# Supplementary material for: A MiR181/Sirtuin1 regulatory circuit modulates drug response in biliary cancers
Source: Springer Nature journal article supplement (doi:10.1007/s10238-024-01332-0), 2024-04-10
Supplement: MOESM3 [file 26963182]

**Table S1. Baseline demographic and clinicopathologic characteristics (n=62).**

| <b>Characteristic</b>             | <b>N (%)</b> |
|-----------------------------------|--------------|
| <b>Age, years (median, range)</b> | 64 (36-88)   |
| <b>Gender</b>                     |              |
| Female                            | 38 (61%)     |
| Male                              | 24 (39%)     |
| <b>ECOG PS</b>                    |              |
| 0-1                               | 45 (73%)     |
| ≥2                                | 17 (27%)     |
| <b>Subtype</b>                    |              |
| iCCA                              | 24 (39%)     |
| eCCA                              | 11 (18%)     |
| GBC                               | 27 (43%)     |
| <b>CA19-9</b>                     |              |
| <37U/mL                           | 42%          |
| >37U/mL                           | 58%          |
| <b>Stage</b>                      |              |
| I-II                              | 41 (66%)     |
| III-IV                            | 21 (34%)     |
| <b>pT</b>                         |              |
| 1                                 | 8 (10%)      |
| 2                                 | 19 (37%)     |
| 3                                 | 23 (42%)     |
| 4                                 | 8 (3%)       |
| x                                 | 4 (8%)       |
| <b>pN</b>                         |              |
| 0                                 | 28 (45%)     |
| 1                                 | 34 (55%)     |
| <b>Resection margins</b>          |              |
| R0                                | 42 (68%)     |
| R1                                | 20 (32%)     |
| <b>Adjuvant chemotherapy</b>      |              |
| Yes                               | 36 (58%)     |
| No                                | 26 (42%)     |
