# Supplementary material for: A MiR181/Sirtuin1 regulatory circuit modulates drug response in biliary cancers
Source: Springer Nature journal article supplement (doi:10.1007/s10238-024-01332-0), 2024-04-10
Supplement: MOESM4 [file 26963182]

Table S2. Differentially expressed genes p-value filtered (<0.05) in BTC patients grouped as miR-181c and miR-181d UP and DOWN expression

| Gene Name  | EnsemblGeneID   | logFC        | pval        | regulation | miRNA    |
|------------|-----------------|--------------|-------------|------------|----------|
| MECR       | ENSG00000116353 | -1,389044062 | 0,007689872 | down       | miR-181d |
| KDM4C      | ENSG00000107077 | -2,050686957 | 0,016832373 | down       | miR-181d |
| CYP27C1    | ENSG00000186684 | -2,24924966  | 0,008813162 | down       | miR-181d |
| FADS1      | ENSG00000149485 | -0,779272244 | 0,004074681 | down       | miR-181d |
| C3orf35    | ENSG00000198590 | -1,941192875 | 0,019466435 | down       | miR-181d |
| PDPN       | ENSG00000162493 | -1,515187778 | 0,014189391 | down       | miR-181d |
| NCKAP5L    | ENSG00000167566 | -1,046800862 | 0,032053621 | down       | miR-181d |
| CENPF      | ENSG00000117724 | -0,888954408 | 0,021763383 | down       | miR-181d |
| CCL23      | ENSG00000274736 | -1,434010996 | 0,0197831   | down       | miR-181d |
| SCN2A      | ENSG00000136531 | -2,825688748 | 0,013625289 | down       | miR-181d |
| NR4A3      | ENSG00000119508 | -2,147319532 | 0,020675382 | down       | miR-181d |
| CCDC181    | ENSG00000117477 | -2,381211214 | 0,010571581 | down       | miR-181d |
| AC109630.1 | ENSG00000259269 | -2,657565157 | 0,015909849 | down       | miR-181d |
| PSCA       | ENSG00000167653 | -3,240834762 | 0,015400496 | down       | miR-181d |
| TRIM29     | ENSG00000137699 | -2,073470681 | 0,014595797 | down       | miR-181d |
| MEDAG      | ENSG00000102802 | -2,254110885 | 0,010276333 | down       | miR-181d |
| ADRB1      | ENSG00000043591 | -2,287767879 | 0,020487323 | down       | miR-181d |
| APOD       | ENSG00000189058 | -1,535373075 | 0,025856188 | down       | miR-181d |
| GLB1L      | ENSG00000163521 | -1,594740384 | 0,044711627 | down       | miR-181d |
| ACOT11     | ENSG00000162390 | -1,467122451 | 0,013796758 | down       | miR-181d |
| BRINP2     | ENSG00000198797 | -2,388096524 | 0,018435059 | down       | miR-181d |
| SUGCT      | ENSG00000175600 | -2,21784532  | 0,006087464 | down       | miR-181d |
| SPON1      | ENSG00000262655 | -1,880624581 | 0,012841413 | down       | miR-181d |
| IFI44L     | ENSG00000137959 | -1,133179962 | 0,037689079 | down       | miR-181d |
| RCS1       | ENSG00000198771 | -1,080254416 | 0,00314633  | down       | miR-181d |
| MRPS9      | ENSG00000135972 | -1,069120983 | 0,005457315 | down       | miR-181d |
| EGR2       | ENSG00000122877 | -2,859630634 | 0,007726673 | down       | miR-181d |
| AUTS2      | ENSG00000158321 | -0,921850769 | 0,011333404 | down       | miR-181d |
| MTRR       | ENSG00000124275 | -0,820153505 | 0,008073447 | down       | miR-181d |
| NFATC1     | ENSG00000131196 | -1,141064045 | 0,004592114 | down       | miR-181d |
| HOTAIRM1   | ENSG00000233429 | -1,115114951 | 0,010606924 | down       | miR-181d |
| CDON       | ENSG00000064309 | -2,481466756 | 0,007635436 | down       | miR-181d |
| RASA3      | ENSG00000185989 | -1,088085945 | 0,03278643  | down       | miR-181d |
| TBL1X      | ENSG00000101849 | -1,130776271 | 0,033809129 | down       | miR-181d |
| ICE2       | ENSG00000128915 | -0,255096898 | 0,042379809 | down       | miR-181d |
| MMP19      | ENSG00000123342 | -1,890627099 | 0,009871606 | down       | miR-181d |
| TBCD       | ENSG00000141556 | -0,664707648 | 0,042545581 | down       | miR-181d |
| GEM        | ENSG00000164949 | -1,84809479  | 0,01567272  | down       | miR-181d |
| DCTN1      | ENSG00000204843 | -0,510545326 | 0,036820498 | down       | miR-181d |
| EGR3       | ENSG00000179388 | -2,3362768   | 0,012323723 | down       | miR-181d |
| CILP       | ENSG00000138615 | -2,181241258 | 0,016032756 | down       | miR-181d |
| SAMSN1     | ENSG00000155307 | -1,690083845 | 0,007561473 | down       | miR-181d |
| TMEM168    | ENSG00000146802 | -1,287805683 | 0,000582023 | down       | miR-181d |
| HAT1       | ENSG00000128708 | -1,254152864 | 0,003090928 | down       | miR-181d |
| SLC39A8    | ENSG00000138821 | -2,101271854 | 0,009424523 | down       | miR-181d |
| ITK        | ENSG00000113263 | -2,329083332 | 0,009231212 | down       | miR-181d |
| GNB4       | ENSG00000114450 | -0,674806707 | 0,005648208 | down       | miR-181d |
| KLHL6      | ENSG00000172578 | -0,960186578 | 0,032734046 | down       | miR-181d |
| AC140912.1 | ENSG00000261227 | -2,969501958 | 0,017360803 | down       | miR-181d |
| GLI3       | ENSG00000106571 | -1,18242312  | 0,049151634 | down       | miR-181d |
| RYR2       | ENSG00000198626 | -1,36265315  | 0,009248721 | down       | miR-181d |
| GATA2      | ENSG00000179348 | -1,761486277 | 0,02578205  | down       | miR-181d |
| SIRT1      | ENSG00000096717 | -0,750072773 | 0,016562038 | down       | miR-181d |
| HSD17B7    | ENSG00000132196 | -1,514767081 | 0,0117744   | down       | miR-181d |
| TLR4       | ENSG00000136869 | -2,388223961 | 0,003093794 | down       | miR-181d |
| ZC3H7A     | ENSG00000122299 | -0,445426554 | 0,042396375 | down       | miR-181d |
| AL133367.1 | ENSG00000260285 | -2,28901696  | 0,018799351 | down       | miR-181d |
| LGI2       | ENSG00000153012 | -2,092297839 | 0,001639299 | down       | miR-181d |
| AC090987.1 | ENSG00000253656 | -2,326820143 | 0,03983113  | down       | miR-181d |
| MAP3K6     | ENSG00000142733 | -1,013917353 | 0,012062501 | down       | miR-181d |
| CAMK1D     | ENSG00000183049 | -1,215026441 | 0,006503006 | down       | miR-181d |
| AC245452.1 | ENSG00000224086 | -3,23443994  | 0,019095607 | down       | miR-181d |
| TESPA1     | ENSG00000135426 | -2,967357068 | 0,016155225 | down       | miR-181d |
| PARM1      | ENSG00000169116 | -2,10373712  | 0,009225932 | down       | miR-181d |
| TFF1       | ENSG00000160182 | -1,847793058 | 0,005877855 | down       | miR-181d |
| EOMES      | ENSG00000163508 | -1,891089228 | 0,007110777 | down       | miR-181d |
| TNNI2      | ENSG00000130598 | -1,759465847 | 0,00892458  | down       | miR-181d |
| AC114760.2 | ENSG00000272211 | -3,087163854 | 0,016111096 | down       | miR-181d |
| CCR4       | ENSG00000183813 | -1,853830345 | 0,007673221 | down       | miR-181d |
| AC092376.2 | ENSG00000277954 | -4,295099966 | 0,047056709 | down       | miR-181d |

|            |                 |              |             |      |          |
|------------|-----------------|--------------|-------------|------|----------|
| GTDC1      | ENSG00000121964 | -1,284680985 | 0,008835978 | down | miR-181d |
| JAKMIP2    | ENSG00000176049 | -2,970187928 | 0,009922132 | down | miR-181d |
| MYH7B      | ENSG00000078814 | -2,779332478 | 0,040395862 | down | miR-181d |
| RHOH       | ENSG00000168421 | -2,204708584 | 0,006618418 | down | miR-181d |
| FLNC       | ENSG00000128591 | -2,257556498 | 0,011033331 | down | miR-181d |
| KLK11      | ENSG00000167757 | -2,691943971 | 0,002430939 | down | miR-181d |
| TENM3      | ENSG00000218336 | -3,016990381 | 0,00013516  | down | miR-181d |
| AL355075.4 | ENSG00000259001 | -2,718006238 | 0,002246227 | down | miR-181d |
| ZNF524     | ENSG00000171443 | -0,991109534 | 0,014317381 | down | miR-181d |
| RBM43      | ENSG00000184898 | -0,967907657 | 0,008459652 | down | miR-181d |
| SPHK1      | ENSG00000176170 | -1,187877183 | 0,004106309 | down | miR-181d |
| LRRC15     | ENSG00000172061 | -2,639618033 | 0,001810049 | down | miR-181d |
| RETN       | ENSG00000104918 | -3,916801104 | 0,014892048 | down | miR-181d |
| LRRC8C     | ENSG00000171488 | -2,531457891 | 0,002120031 | down | miR-181d |
| Z97200.1   | ENSG00000271811 | -1,831707343 | 0,007827952 | down | miR-181d |
| SLC25A14   | ENSG00000102078 | -1,167894681 | 0,01797506  | down | miR-181d |
| RASGEF1A   | ENSG00000198915 | -2,160773328 | 0,012166638 | down | miR-181d |
| THEMIS2    | ENSG00000130775 | -2,452246695 | 0,000209426 | down | miR-181d |
| TNIP3      | ENSG00000050730 | -2,176020875 | 0,010505589 | down | miR-181d |
| AC096677.1 | ENSG00000224536 | -2,83351367  | 0,018664723 | down | miR-181d |
| UQCRHL     | ENSG00000233954 | -2,763274273 | 0,005636748 | down | miR-181d |
| RGS22      | ENSG00000132554 | -4,177895144 | 0,02202901  | down | miR-181d |
| AMBRA1     | ENSG00000110497 | -1,308830418 | 0,003286133 | down | miR-181d |
| AC005899.5 | ENSG00000266385 | -1,91604283  | 0,023481648 | down | miR-181d |
| DMBT1      | ENSG00000187908 | -3,125669845 | 0,021300398 | down | miR-181d |
| ASB11      | ENSG00000165192 | -4,21351673  | 0,015648825 | down | miR-181d |
| CACNA1A    | ENSG00000141837 | -1,202816823 | 0,022405167 | down | miR-181d |
| PLEKHS1    | ENSG00000148735 | -2,355030143 | 0,01178919  | down | miR-181d |
| AC108134.2 | ENSG00000261889 | -2,75627003  | 0,043674242 | down | miR-181d |
| NRROS      | ENSG00000174004 | -2,790646803 | 0,019885957 | down | miR-181d |
| AL031595.2 | ENSG00000280011 | -3,347562871 | 0,024235226 | down | miR-181d |
| AL357033.4 | ENSG00000277496 | -3,201897291 | 0,008226136 | down | miR-181d |
| LMOD3      | ENSG00000163380 | -3,960045781 | 0,030806188 | down | miR-181d |
| RTP1       | ENSG00000175077 | -4,108846051 | 0,02056943  | down | miR-181d |
| ESR2       | ENSG00000140009 | -4,466381624 | 0,021883444 | down | miR-181d |
| AC073352.1 | ENSG00000272662 | -2,778122048 | 0,022309558 | down | miR-181d |
| CDHR4      | ENSG00000187492 | -2,691282318 | 0,001640724 | down | miR-181d |
| TRIM45     | ENSG00000134253 | 2,256918514  | 0,037268881 | up   | miR-181d |
| PHOSPHO2   | ENSG00000144362 | 1,325512444  | 0,040899065 | up   | miR-181d |
| BCL7A      | ENSG00000110987 | 1,998216558  | 0,024989045 | up   | miR-181d |
| PPARGC1A   | ENSG00000109819 | 4,333904643  | 0,015359103 | up   | miR-181d |
| CSTF2T     | ENSG00000177613 | 2,552485886  | 0,046059703 | up   | miR-181d |
| DAB2IP     | ENSG00000136848 | 0,873460826  | 0,016765332 | down | miR-181d |
| CNTNAP1    | ENSG00000108797 | 2,918963373  | 0,040826346 | up   | miR-181d |
| ZNF575     | ENSG00000176472 | 2,593793794  | 0,049967707 | up   | miR-181d |
| NFYC       | ENSG00000066136 | 2,127480652  | 0,026501165 | up   | miR-181d |
| MRV11      | ENSG00000072952 | 1,711823428  | 0,035998168 | up   | miR-181d |
| PTER       | ENSG00000165983 | 0,945653901  | 0,031905006 | down | miR-181d |
| RASA12     | ENSG00000075391 | 0,706314077  | 0,043574446 | down | miR-181d |
| RPP25L     | ENSG00000164967 | 1,496678457  | 0,046723249 | up   | miR-181d |
| ALS2CL     | ENSG00000178038 | 1,105007329  | 0,008550635 | up   | miR-181d |
| PARP6      | ENSG00000137817 | 0,53288589   | 0,044771969 | down | miR-181d |
| BCL3       | ENSG00000069399 | 1,391214832  | 0,017918747 | up   | miR-181d |
| TM2D2      | ENSG00000169490 | 1,64453822   | 0,010852484 | up   | miR-181d |
| SLCGA1     | ENSG00000157103 | 2,986460266  | 0,001299485 | up   | miR-181d |
| ZNF485     | ENSG00000198298 | 1,725657241  | 0,046924573 | up   | miR-181d |
| TPRA1      | ENSG00000163870 | 1,268634367  | 0,042824011 | up   | miR-181d |
| PSMD6      | ENSG00000163636 | 0,892125987  | 0,035149787 | down | miR-181d |
| AC084125.4 | ENSG00000265393 | 2,639747972  | 0,029461563 | up   | miR-181d |
| YEATS4     | ENSG00000127337 | 1,274753251  | 0,023237138 | up   | miR-181d |
| C18orf21   | ENSG00000141428 | 1,901480232  | 0,039267415 | up   | miR-181d |
| C5orf49    | ENSG00000215217 | 1,6263295    | 0,041083226 | up   | miR-181d |
| CREB3L3    | ENSG00000060566 | 2,737110044  | 0,029999326 | up   | miR-181d |
| BAIAP2-DT  | ENSG00000226137 | 1,795194296  | 0,008939771 | up   | miR-181d |
| LENG9      | ENSG00000275183 | 1,355779492  | 0,04172525  | up   | miR-181d |
| SNRK-AS1   | ENSG00000234617 | 2,20352694   | 0,043884694 | up   | miR-181d |
| TMEM61     | ENSG00000143001 | 1,386326218  | 0,025494518 | up   | miR-181d |
| ARMCX6     | ENSG00000198960 | 1,302503711  | 0,034722432 | up   | miR-181d |
| TAS2R19    | ENSG00000212124 | 1,834261109  | 0,012054019 | up   | miR-181d |
| ANXA9      | ENSG00000143412 | 3,748141129  | 0,025978918 | up   | miR-181d |
| FICD       | ENSG00000198855 | 2,469802274  | 0,025472641 | up   | miR-181d |
| CNNM1      | ENSG00000119946 | 3,47253448   | 0,041049436 | up   | miR-181d |
| PHLPP2     | ENSG00000040199 | 2,165199871  | 0,013328483 | up   | miR-181d |
| ACTL10     | ENSG00000182584 | 2,600615693  | 0,002655193 | up   | miR-181d |
| LINC01637  | ENSG00000237476 | 2,125613999  | 0,016873379 | up   | miR-181d |
| AL353194.1 | ENSG00000229539 | 3,280365202  | 0,002146844 | up   | miR-181d |
| CBWD2      | ENSG00000136682 | 1,433875976  | 0,042704156 | up   | miR-181d |

|             |                  |             |             |      |          |
|-------------|------------------|-------------|-------------|------|----------|
| FAM84B      | ENSG00000168672  | 2,533708987 | 0,007746588 | up   | miR-181d |
| TBPL1       | ENSG00000028839  | 1,027620614 | 0,049742833 | up   | miR-181d |
| NR2F1-AS1   | ENSG00000237187  | 2,549786074 | 0,024580861 | up   | miR-181d |
| ZNF253      | ENSG00000256771  | 2,428413971 | 0,014197013 | up   | miR-181d |
| EIF5A11     | ENSG00000253626  | 1,474974397 | 0,03860612  | up   | miR-181d |
| RBM18       | ENSG00000119446  | 1,523189272 | 0,033205701 | up   | miR-181d |
| ZNF304      | ENSG00000131845  | 1,926309309 | 0,006654879 | up   | miR-181d |
| SLC35E2     | ENSG00000189339  | 2,233027399 | 0,033051019 | up   | miR-181d |
| ZNF529      | ENSG00000186020  | 2,090301815 | 0,037493528 | up   | miR-181d |
| RCBTB1      | ENSG00000136144  | 2,766711841 | 0,005944828 | up   | miR-181d |
| PARVB       | ENSG00000188677  | 0,989549438 | 0,032223496 | down | miR-181d |
| FAM35A      | ENSG00000122376  | 1,551330442 | 0,036192392 | up   | miR-181d |
| UCK2        | ENSG00000143179  | 1,624907181 | 0,022918276 | up   | miR-181d |
| FAM111B     | ENSG00000189057  | 3,021709529 | 0,007772145 | up   | miR-181d |
| IPO4        | ENSG00000196497  | 1,554954592 | 0,043115835 | up   | miR-181d |
| RNASEH1-AS1 | ENSG00000234171  | 1,753310432 | 0,018785666 | up   | miR-181d |
| WNK2        | ENSG00000165238  | 4,105612394 | 0,026797435 | up   | miR-181d |
| C16orf59    | ENSG00000162062  | 1,889906388 | 0,023257743 | up   | miR-181d |
| PLCD1       | ENSG00000187091  | 2,143202979 | 0,017326578 | up   | miR-181d |
| N6AMT1      | ENSG00000156239  | 2,183644895 | 0,020157028 | up   | miR-181d |
| SPRY4       | ENSG00000187678  | 1,426628316 | 0,048267929 | up   | miR-181d |
| GALNT18     | ENSG00000110328  | 2,003935862 | 0,021198008 | up   | miR-181d |
| ASB16-AS1   | ENSG00000267080  | 1,768719182 | 0,042851195 | up   | miR-181d |
| NUP50       | ENSG00000093000  | 1,048377292 | 0,01346091  | up   | miR-181d |
| TUBGCP5     | ENSG00000275835  | 1,663477774 | 0,014470355 | up   | miR-181d |
| C9orf156    | ENSG00000136932  | 1,935399422 | 0,04573774  | up   | miR-181d |
| CWF19L1     | ENSG00000095485  | 1,126204034 | 0,017575593 | up   | miR-181d |
| MFSD6       | ENSG00000151690  | 1,634435504 | 0,018494837 | up   | miR-181d |
| SNX33       | ENSG00000173548  | 1,136337207 | 0,028784152 | up   | miR-181d |
| NRAV        | ENSG00000248008  | 2,012576484 | 0,021198568 | up   | miR-181d |
| ZDHHC23     | ENSG00000184307  | 3,064939277 | 0,003142248 | up   | miR-181d |
| CAP2        | ENSG00000112186  | 1,609475762 | 0,013841591 | up   | miR-181d |
| AL162377.1  | ENSG00000231856  | 2,397931811 | 0,016869462 | up   | miR-181d |
| RBM15       | ENSG00000162775  | 0,931751332 | 0,037517128 | down | miR-181d |
| ZNF627      | ENSG00000198551  | 1,184228732 | 0,037029041 | up   | miR-181d |
| ATRN        | ENSG00000088812  | 2,587267981 | 0,000176217 | up   | miR-181d |
| ZNF837      | ENSG00000152475  | 1,66221274  | 0,035187597 | up   | miR-181d |
| DNAL4       | ENSG00000100246  | 2,22350429  | 0,007481258 | up   | miR-181d |
| WBSCR16     | ENSG00000274523  | 1,296563964 | 0,008197354 | up   | miR-181d |
| LIG4        | ENSG00000174405  | 2,801250876 | 0,002536271 | up   | miR-181d |
| RHOA        | ENSG00000116574  | 2,900245297 | 0,00061971  | up   | miR-181d |
| PCCA        | ENSG00000175198  | 1,732233115 | 0,004402983 | up   | miR-181d |
| SOCS5       | ENSG00000171150  | 1,769213684 | 0,017215712 | up   | miR-181d |
| PLIN4       | ENSG00000167676  | 2,494636349 | 0,005978886 | up   | miR-181d |
| PCNA        | ENSG00000132646  | 1,230975926 | 0,034460069 | up   | miR-181d |
| UFM1        | ENSG00000120686  | 1,026294648 | 0,007891384 | up   | miR-181d |
| TBC1D8      | ENSG00000204634  | 1,662387691 | 0,025169241 | up   | miR-181d |
| AC027307.2  | ENSG00000267317  | 2,840142581 | 0,008132519 | up   | miR-181d |
| CGGBP1      | ENSG00000163320  | 0,90073069  | 0,046256761 | down | miR-181d |
| TRMT5       | ENSG00000126814  | 1,592852321 | 0,046603407 | up   | miR-181d |
| RGMB        | ENSG00000174136  | 1,783469403 | 0,020013106 | up   | miR-181d |
| SUPV3L1     | ENSG00000156502  | 1,05387656  | 0,026830249 | up   | miR-181d |
| DBNDD1      | ENSG00000003249  | 3,214967201 | 0,002269341 | up   | miR-181d |
| CRBN        | ENSG00000113851  | 1,497125627 | 0,002708481 | up   | miR-181d |
| SCLY        | ENSG00000132330  | 2,259236551 | 0,039414737 | up   | miR-181d |
| CCNB1IP1    | ENSG00000100814  | 1,599354329 | 0,040038789 | up   | miR-181d |
| PRKAA2      | ENSG00000162409  | 2,660885994 | 0,005235812 | up   | miR-181d |
| SLC38A6     | ENSG00000139974  | 1,017098783 | 0,010195549 | up   | miR-181d |
| IDE         | ENSG00000119912  | 1,169395065 | 0,019881741 | up   | miR-181d |
| SCX         | ENSG00000260428  | 4,242598087 | 0,037532376 | up   | miR-181d |
| CAPN7       | ENSG00000131375  | 0,987408952 | 0,028520738 | down | miR-181d |
| GALNT11     | ENSG00000178234  | 1,342687039 | 0,029623204 | up   | miR-181d |
| ARHGEF17    | ENSG00000110237  | 0,969998743 | 0,046257699 | down | miR-181d |
| KLF13       | ENSG00000169926  | 1,92438861  | 0,003845548 | up   | miR-181d |
| NFYC-AS1    | ENSG00000272145  | 1,991190056 | 0,048916979 | up   | miR-181d |
| SMLR1       | ENSG00000256162  | 1,886352012 | 0,041710519 | up   | miR-181d |
| ING3        | ENSG000000071243 | 2,264649772 | 0,00458029  | up   | miR-181d |
| MRI1        | ENSG00000037757  | 1,597831378 | 0,008282108 | up   | miR-181d |
| MRPL10      | ENSG00000159111  | 1,315928811 | 0,024461747 | up   | miR-181d |
| BCO2        | ENSG00000197580  | 2,703443698 | 0,011182853 | up   | miR-181d |
| AKR1C2      | ENSG00000151632  | 1,595387796 | 0,027120269 | up   | miR-181d |
| RFC2        | ENSG00000049541  | 1,328333128 | 0,013384046 | up   | miR-181d |
| BTBD10      | ENSG00000148925  | 1,636832578 | 0,004522928 | up   | miR-181d |
| CHST4       | ENSG00000140835  | 2,96693419  | 0,029046248 | up   | miR-181d |
| EIF4ENIF1   | ENSG00000184708  | 1,197114536 | 0,041293626 | up   | miR-181d |
| IGFBP4      | ENSG00000141753  | 2,046385521 | 0,04229052  | up   | miR-181d |
| POLI        | ENSG00000101751  | 1,684631162 | 0,031426684 | up   | miR-181d |

|           |                  |             |             |      |          |
|-----------|------------------|-------------|-------------|------|----------|
| COQ5      | ENSG00000110871  | 1,481342554 | 0,008176525 | up   | miR-181d |
| ABL1      | ENSG00000097007  | 0,959675033 | 0,032900667 | down | miR-181d |
| CRTAP     | ENSG00000170275  | 0,881906087 | 0,034660739 | down | miR-181d |
| C9orf106  | ENSG00000179082  | 2,03233222  | 0,041690466 | up   | miR-181d |
| MTX2      | ENSG00000128654  | 2,984351614 | 0,034664021 | up   | miR-181d |
| OSGIN2    | ENSG00000164823  | 1,457698325 | 0,01544277  | up   | miR-181d |
| GATB      | ENSG00000059691  | 2,882482667 | 0,008283652 | up   | miR-181d |
| TPRN      | ENSG00000176058  | 2,519318961 | 0,001153739 | up   | miR-181d |
| TMEM184C  | ENSG00000164168  | 1,891098382 | 0,029858812 | up   | miR-181d |
| AKR7A2    | ENSG00000053371  | 1,373450096 | 0,039444366 | up   | miR-181d |
| MCCC2     | ENSG00000131844  | 1,30529524  | 0,008400549 | up   | miR-181d |
| TMEM14A   | ENSG00000096092  | 1,513122025 | 0,032228696 | up   | miR-181d |
| EXOSC8    | ENSG00000120699  | 1,619042147 | 0,027699971 | up   | miR-181d |
| NCKIP5D   | ENSG00000213672  | 2,314768964 | 0,018772807 | up   | miR-181d |
| ZNF407    | ENSG00000215421  | 1,059274976 | 0,015105226 | up   | miR-181d |
| TSPAN6    | ENSG00000000003  | 0,822209504 | 0,040288251 | down | miR-181d |
| NAB2      | ENSG00000166886  | 1,585154341 | 0,034284988 | up   | miR-181d |
| AASDHPPT  | ENSG00000149313  | 1,126743665 | 0,023787077 | up   | miR-181d |
| MRRF      | ENSG00000148187  | 1,348953443 | 0,024180443 | up   | miR-181d |
| TMTC4     | ENSG00000125247  | 3,415845735 | 0,008418042 | up   | miR-181d |
| PRR7      | ENSG00000131188  | 2,657312844 | 0,048578704 | up   | miR-181d |
| EMC6      | ENSG00000127774  | 1,127573235 | 0,045135069 | up   | miR-181d |
| IPP       | ENSG00000197429  | 1,384257291 | 0,032658802 | up   | miR-181d |
| ZFP30     | ENSG00000120784  | 1,778446805 | 0,00540303  | up   | miR-181d |
| F8        | ENSG00000185010  | 2,387501767 | 0,028296445 | up   | miR-181d |
| AIFM2     | ENSG00000042286  | 1,752021563 | 0,02298551  | up   | miR-181d |
| CYB561D1  | ENSG00000174151  | 1,993808037 | 0,025046435 | up   | miR-181d |
| ANO10     | ENSG00000160746  | 1,18129701  | 0,027005706 | up   | miR-181d |
| MYO1D     | ENSG00000176658  | 1,549796068 | 0,042157936 | up   | miR-181d |
| SETD7     | ENSG00000145391  | 0,950101313 | 0,044394207 | down | miR-181d |
| FBXO31    | ENSG00000103264  | 1,197081083 | 0,045679403 | up   | miR-181d |
| JAG1      | ENSG00000101384  | 1,096133352 | 0,003441332 | up   | miR-181d |
| TMEM242   | ENSG00000215712  | 2,242381373 | 0,03535334  | up   | miR-181d |
| TDG       | ENSG00000139372  | 1,019359568 | 0,016908551 | up   | miR-181d |
| KIAA1191  | ENSG00000122203  | 1,183339069 | 0,049792054 | up   | miR-181d |
| SH2B3     | ENSG00000111252  | 1,384659088 | 0,010134914 | up   | miR-181d |
| FAM174A   | ENSG00000174132  | 1,766126855 | 0,031305897 | up   | miR-181d |
| SCRN3     | ENSG00000144306  | 1,498518413 | 0,049484944 | up   | miR-181d |
| TGFBRAP1  | ENSG00000135966  | 1,236731451 | 0,006277957 | up   | miR-181d |
| KIAA1586  | ENSG00000168116  | 1,812905366 | 0,004644219 | up   | miR-181d |
| LRRC20    | ENSG00000172731  | 1,420630431 | 0,045480427 | up   | miR-181d |
| ELOVL7    | ENSG00000164181  | 3,482958779 | 0,010669775 | up   | miR-181d |
| SWAP70    | ENSG00000133789  | 1,31464456  | 0,032680033 | up   | miR-181d |
| TTL       | ENSG00000114999  | 0,674696091 | 0,04951272  | down | miR-181d |
| VPS26A    | ENSG00000122958  | 0,907434722 | 0,014416156 | down | miR-181d |
| LOXL4     | ENSG00000138131  | 1,847911359 | 0,041050487 | up   | miR-181d |
| MCAT      | ENSG00000100294  | 1,778456163 | 0,034001091 | up   | miR-181d |
| FOXA2     | ENSG00000125798  | 1,373107399 | 0,021915338 | up   | miR-181d |
| SNX10     | ENSG00000086300  | 1,701536024 | 0,025981961 | up   | miR-181d |
| QRICH1    | ENSG00000198218  | 1,348566676 | 0,022736969 | up   | miR-181d |
| NTPCR     | ENSG00000135778  | 1,331346194 | 0,020149061 | up   | miR-181d |
| CHCHD1    | ENSG00000172586  | 1,168980397 | 0,009702085 | up   | miR-181d |
| DDX51     | ENSG00000185163  | 0,922877417 | 0,029625893 | down | miR-181d |
| ZNF625    | ENSG00000257591  | 2,168498216 | 0,033822789 | up   | miR-181d |
| PYGO1     | ENSG00000171016  | 1,866466557 | 0,025700721 | up   | miR-181d |
| RIT1      | ENSG00000143622  | 1,39023089  | 0,00656562  | up   | miR-181d |
| HIST1H2BD | ENSG00000158373  | 1,540348594 | 0,035019008 | up   | miR-181d |
| NDUFAB3   | ENSG00000178057  | 1,196523981 | 0,01711467  | up   | miR-181d |
| ALG1      | ENSG00000033011  | 1,857890661 | 0,011445951 | up   | miR-181d |
| ILKAP     | ENSG00000132323  | 1,915705892 | 0,002509659 | up   | miR-181d |
| ANP32A    | ENSG00000140350  | 0,824951039 | 0,035802598 | down | miR-181d |
| TMCC1     | ENSG00000172765  | 0,983147129 | 0,002447691 | down | miR-181d |
| GOLGA3    | ENSG000000090615 | 1,022232171 | 0,006249461 | up   | miR-181d |
| MICU2     | ENSG00000165487  | 1,225906236 | 0,032310031 | up   | miR-181d |
| ESD       | ENSG00000139684  | 2,072628605 | 0,001174564 | up   | miR-181d |
| PPP3CB    | ENSG00000107758  | 1,210423688 | 0,007927191 | up   | miR-181d |
| BRWD1     | ENSG00000185658  | 0,800872877 | 0,020085283 | down | miR-181d |
| CRYZ      | ENSG00000116791  | 0,862330558 | 0,040584209 | down | miR-181d |
| STIM1     | ENSG00000167323  | 0,91535463  | 0,024802384 | down | miR-181d |
| CLK4      | ENSG00000113240  | 0,818191413 | 0,036218653 | down | miR-181d |
| SRBD1     | ENSG00000068784  | 1,178909787 | 0,032555858 | up   | miR-181d |
| RPL3      | ENSG00000100316  | 2,38309156  | 0,00425697  | up   | miR-181d |
| DNAH5     | ENSG00000039139  | 2,29953768  | 0,009801596 | up   | miR-181d |
| TBC1D5    | ENSG00000131374  | 0,616972807 | 0,034491464 | down | miR-181d |
| EC1       | ENSG00000167969  | 1,935725098 | 0,004325295 | up   | miR-181d |
| TSFM      | ENSG00000123297  | 1,925442326 | 0,016128149 | up   | miR-181d |
| SIAH1     | ENSG00000196470  | 1,872243864 | 0,032598802 | up   | miR-181d |

|            |                  |             |             |      |          |
|------------|------------------|-------------|-------------|------|----------|
| SLC1A7     | ENSG00000162383  | 2,676172678 | 0,036636111 | up   | miR-181d |
| WDR12      | ENSG00000138442  | 1,134918056 | 0,010084574 | up   | miR-181d |
| NSUN4      | ENSG00000117481  | 1,179437838 | 0,034651908 | up   | miR-181d |
| CADM4      | ENSG00000105767  | 3,31349713  | 0,001608745 | up   | miR-181d |
| RBM4       | ENSG00000173933  | 1,490881862 | 0,017449098 | up   | miR-181d |
| GNB2       | ENSG00000172354  | 1,39942658  | 0,02336718  | up   | miR-181d |
| SSSCA1     | ENSG00000173465  | 1,27765195  | 0,045069265 | up   | miR-181d |
| NUDT2      | ENSG00000164978  | 1,726147749 | 0,006541987 | up   | miR-181d |
| UNC5B      | ENSG00000107731  | 1,51770694  | 0,019984102 | up   | miR-181d |
| PIGK       | ENSG00000142892  | 1,186952275 | 0,048364709 | up   | miR-181d |
| AL683813.1 | ENSG00000232611  | 1,539264808 | 0,033473756 | up   | miR-181d |
| HRSP12     | ENSG00000132541  | 2,409581817 | 0,005616278 | up   | miR-181d |
| DFNA5      | ENSG00000105928  | 2,222402752 | 0,015874173 | up   | miR-181d |
| CCDC174    | ENSG00000154781  | 1,223556813 | 0,002593847 | up   | miR-181d |
| THUMPD3    | ENSG000001734077 | 1,758586028 | 0,004612735 | up   | miR-181d |
| NSUN3      | ENSG00000178694  | 2,765748487 | 0,004730239 | up   | miR-181d |
| CHRN1      | ENSG00000170175  | 2,260877562 | 0,034819744 | up   | miR-181d |
| HHEX       | ENSG00000152804  | 2,119642978 | 0,028198279 | up   | miR-181d |
| HGD        | ENSG00000113924  | 2,611673216 | 0,003889469 | up   | miR-181d |
| CRLS1      | ENSG000000088766 | 1,537587087 | 0,018135383 | up   | miR-181d |
| DECR1      | ENSG00000104325  | 1,133305933 | 0,028614898 | up   | miR-181d |
| COQ3       | ENSG00000132423  | 1,685496553 | 0,037757682 | up   | miR-181d |
| TAF1B      | ENSG00000115750  | 1,43557977  | 0,019275685 | up   | miR-181d |
| GEN1       | ENSG00000178295  | 1,472707942 | 0,018901609 | up   | miR-181d |
| HAGH       | ENSG00000063854  | 1,929770124 | 0,000833833 | up   | miR-181d |
| SDSL       | ENSG00000139410  | 2,127222939 | 0,001965345 | up   | miR-181d |
| WDR91      | ENSG00000105875  | 1,433973466 | 0,037391596 | up   | miR-181d |
| GATS       | ENSG00000239521  | 1,396580827 | 0,041166459 | up   | miR-181d |
| IVD        | ENSG00000128928  | 0,92417583  | 0,029232363 | down | miR-181d |
| SMARCD1    | ENSG00000163104  | 1,966855402 | 0,009447747 | up   | miR-181d |
| TM7SF2     | ENSG00000149809  | 1,514060372 | 0,024079199 | up   | miR-181d |
| ELOVL5     | ENSG00000012660  | 1,413259716 | 0,015107328 | up   | miR-181d |
| PAFAH1B1   | ENSG00000007168  | 0,843560438 | 0,019280934 | down | miR-181d |
| GMPR2      | ENSG00000100938  | 1,312648308 | 0,016861183 | up   | miR-181d |
| PTPRS      | ENSG00000105426  | 1,204875904 | 0,01509953  | up   | miR-181d |
| ECSIT      | ENSG00000130159  | 1,094909467 | 0,02105716  | up   | miR-181d |
| UBAP2L     | ENSG00000143569  | 1,133980208 | 0,035974703 | up   | miR-181d |
| UGDH       | ENSG00000109814  | 1,918298271 | 0,00065098  | up   | miR-181d |
| SEC24A     | ENSG00000113615  | 1,424139042 | 0,004741589 | up   | miR-181d |
| SEC14L2    | ENSG00000100003  | 1,421745704 | 0,008239402 | up   | miR-181d |
| MAN2A2     | ENSG00000196547  | 0,849065334 | 0,022837356 | down | miR-181d |
| TYW5       | ENSG00000162971  | 1,127034724 | 0,026404473 | up   | miR-181d |
| GLIS3      | ENSG00000107249  | 0,618372746 | 0,047190816 | down | miR-181d |
| NDUFA7     | ENSG00000267855  | 1,10096073  | 0,049860864 | up   | miR-181d |
| SNRBP2     | ENSG00000125870  | 1,449452527 | 0,012385516 | up   | miR-181d |
| C6orf1     | ENSG00000186577  | 0,867670031 | 0,040438707 | down | miR-181d |
| STAM       | ENSG00000136738  | 1,730848752 | 0,002114626 | up   | miR-181d |
| STOM       | ENSG00000148175  | 1,547388428 | 0,013013269 | up   | miR-181d |
| WRNIP1     | ENSG00000124535  | 1,886534587 | 0,027967202 | up   | miR-181d |
| STX12      | ENSG00000117758  | 0,775134868 | 0,044601278 | down | miR-181d |
| KLHL5      | ENSG00000109790  | 0,828270873 | 0,036801651 | down | miR-181d |
| RPSA       | ENSG00000168028  | 0,871625609 | 0,004912811 | down | miR-181d |
| ZZZ3       | ENSG00000036549  | 0,973990946 | 0,027390975 | down | miR-181d |
| TNKS       | ENSG00000173273  | 0,776801202 | 0,032516082 | down | miR-181d |
| NRAS       | ENSG00000213281  | 1,409297039 | 0,049487326 | up   | miR-181d |
| FBXO42     | ENSG00000037637  | 1,210464005 | 0,006644385 | up   | miR-181d |
| TMTC3      | ENSG00000139324  | 1,236027677 | 0,005261538 | up   | miR-181d |
| POLR2K     | ENSG00000147669  | 1,082971661 | 0,049481673 | up   | miR-181d |
| RPP14      | ENSG00000163684  | 1,365246367 | 0,014305025 | up   | miR-181d |
| PIAS3      | ENSG00000131788  | 1,329370154 | 0,000906666 | up   | miR-181d |
| RAB1A      | ENSG00000138069  | 1,110771665 | 0,008078242 | up   | miR-181d |
| HACD3      | ENSG00000074696  | 1,114008024 | 0,014503142 | up   | miR-181d |
| SLC35C1    | ENSG00000181830  | 1,258352296 | 0,031459699 | up   | miR-181d |
| MMP24-AS1  | ENSG00000126005  | 0,921994201 | 0,020803676 | down | miR-181d |
| PCBD2      | ENSG00000132570  | 1,687548402 | 0,020439217 | up   | miR-181d |
| HN1L       | ENSG00000206053  | 1,53959049  | 0,011760354 | up   | miR-181d |
| SETD6      | ENSG00000103037  | 1,890453843 | 0,007553053 | up   | miR-181d |
| RILPL1     | ENSG00000188026  | 1,566286139 | 0,008547088 | up   | miR-181d |
| DMTN       | ENSG00000158856  | 1,661981656 | 0,029753781 | up   | miR-181d |
| NDFIP1     | ENSG00000131507  | 0,96747991  | 0,026251225 | down | miR-181d |
| SNX4       | ENSG00000114520  | 0,921775027 | 0,028764734 | down | miR-181d |
| ADO        | ENSG00000181915  | 1,857638527 | 0,021689329 | up   | miR-181d |
| TMEM30B    | ENSG00000182107  | 1,666404617 | 0,001720717 | up   | miR-181d |
| EDA2R      | ENSG00000131080  | 3,187239282 | 0,0086757   | up   | miR-181d |
| GTF2F2     | ENSG00000188342  | 1,019609527 | 0,017592222 | up   | miR-181d |
| AC064836.3 | ENSG00000273456  | 1,512755144 | 0,012391139 | up   | miR-181d |
| FGD5-AS1   | ENSG00000225733  | 1,076049527 | 0,008578555 | up   | miR-181d |

|            |                  |             |             |      |          |
|------------|------------------|-------------|-------------|------|----------|
| SECISBP2L  | ENSG00000138593  | 1,107213841 | 0,010676112 | up   | miR-181d |
| PPP6R3     | ENSG00000110075  | 0,67526495  | 0,03897229  | down | miR-181d |
| SLC1A1     | ENSG00000106688  | 3,440465137 | 0,011317701 | up   | miR-181d |
| AFG3L2     | ENSG00000141385  | 1,030477587 | 0,002362253 | up   | miR-181d |
| ACLY       | ENSG00000131473  | 0,926175079 | 0,00295562  | down | miR-181d |
| PTGFRN     | ENSG00000134247  | 1,26262975  | 0,035102842 | up   | miR-181d |
| C19orf12   | ENSG00000131943  | 1,30354789  | 0,014064028 | up   | miR-181d |
| TMEM109    | ENSG00000110108  | 0,784791743 | 0,047335962 | down | miR-181d |
| DDX56      | ENSG00000136271  | 0,895451042 | 0,01288196  | down | miR-181d |
| METTL2B    | ENSG00000165055  | 0,770064955 | 0,020768643 | down | miR-181d |
| THEM4      | ENSG00000159445  | 1,363124145 | 0,019271394 | up   | miR-181d |
| PNP        | ENSG00000198805  | 1,410263556 | 0,008368638 | up   | miR-181d |
| ZFX        | ENSG00000005889  | 1,085688057 | 0,017905433 | up   | miR-181d |
| HNRNPA0    | ENSG00000177733  | 1,740169115 | 0,000131049 | up   | miR-181d |
| GTF3C3     | ENSG00000119041  | 1,009584402 | 0,020240952 | up   | miR-181d |
| ATP9A      | ENSG000000054793 | 1,214736756 | 0,021153375 | up   | miR-181d |
| TP53       | ENSG00000141510  | 1,454809834 | 0,012281195 | up   | miR-181d |
| C2orf15    | ENSG00000273045  | 3,516718609 | 0,009610455 | up   | miR-181d |
| ITGA2      | ENSG0000022237   | 2,33522237  | 0,018366566 | up   | miR-181d |
| FAAH2      | ENSG00000165591  | 2,580077807 | 0,035410535 | up   | miR-181d |
| ZNF766     | ENSG00000196214  | 1,282803693 | 0,032488802 | up   | miR-181d |
| METTL15    | ENSG00000169519  | 1,372154095 | 0,016565271 | up   | miR-181d |
| TMPPRS2    | ENSG00000184012  | 2,421700341 | 0,033539757 | up   | miR-181d |
| HCFC1      | ENSG00000172534  | 0,793050845 | 0,047072773 | down | miR-181d |
| ORC4       | ENSG00000115947  | 1,402825518 | 0,026175898 | up   | miR-181d |
| GSK3B      | ENSG000000082701 | 0,873243446 | 0,007453936 | down | miR-181d |
| RPL17      | ENSG00000265681  | 1,956472383 | 0,005830573 | up   | miR-181d |
| SNRPD3     | ENSG00000100028  | 0,973012556 | 0,009175951 | down | miR-181d |
| PRPF19     | ENSG00000110107  | 1,110174072 | 0,001971482 | up   | miR-181d |
| ATF1       | ENSG00000123268  | 1,324650249 | 0,036435481 | up   | miR-181d |
| ETNK2      | ENSG00000143845  | 2,542574408 | 0,029604716 | up   | miR-181d |
| HIST1H4E   | ENSG00000276966  | 3,206229513 | 0,004585905 | up   | miR-181d |
| AC008771.1 | ENSG00000249042  | 2,564570709 | 0,016843003 | up   | miR-181d |
| NENF       | ENSG00000117691  | 0,982831992 | 0,009996937 | down | miR-181d |
| BUD31      | ENSG00000106245  | 1,286156907 | 0,003881524 | up   | miR-181d |
| ZNF25      | ENSG00000175395  | 2,125398584 | 0,008340135 | up   | miR-181d |
| SMYD2      | ENSG00000143499  | 1,363047341 | 0,027671983 | up   | miR-181d |
| DMXL1      | ENSG00000172869  | 0,851311122 | 0,008945257 | down | miR-181d |
| ZNF678     | ENSG00000181450  | 1,685145477 | 0,01324189  | up   | miR-181d |
| RBM41      | ENSG000000089682 | 1,258252874 | 0,000306741 | up   | miR-181d |
| NDUFB10    | ENSG00000140990  | 1,116613223 | 0,028943468 | up   | miR-181d |
| GGA2       | ENSG00000103365  | 1,209362358 | 0,023488961 | up   | miR-181d |
| KEAP1      | ENSG00000079999  | 1,140182449 | 0,023796794 | up   | miR-181d |
| COG5       | ENSG00000164597  | 1,396951426 | 0,015021477 | up   | miR-181d |
| DNMBP      | ENSG00000107554  | 1,377132335 | 0,010159771 | up   | miR-181d |
| AKR1B10    | ENSG00000198074  | 2,22691802  | 0,014777786 | up   | miR-181d |
| C18orf32   | ENSG00000177576  | 1,437024401 | 0,035982003 | up   | miR-181d |
| NAGLU      | ENSG00000108784  | 1,035227274 | 0,026781724 | up   | miR-181d |
| NOL4L      | ENSG00000197183  | 0,996187115 | 0,048622763 | down | miR-181d |
| PAK2       | ENSG00000180370  | 1,36922565  | 0,027565674 | up   | miR-181d |
| FAM32A     | ENSG00000105058  | 1,706565549 | 0,001407477 | up   | miR-181d |
| MAP4K5     | ENSG00000012983  | 0,930669137 | 0,01690977  | down | miR-181d |
| ELAVL1     | ENSG00000066044  | 1,028899421 | 0,025714839 | up   | miR-181d |
| AKIRIN2    | ENSG00000135334  | 2,11822972  | 0,005655993 | up   | miR-181d |
| NOL6       | ENSG00000165271  | 1,439576453 | 0,02018583  | up   | miR-181d |
| CCNG1      | ENSG00000113328  | 2,038189484 | 0,012254813 | up   | miR-181d |
| ZNF219     | ENSG00000165804  | 2,98379874  | 0,009039568 | up   | miR-181d |
| RAPH1      | ENSG00000173166  | 1,685081012 | 0,002278506 | up   | miR-181d |
| FBXO25     | ENSG00000147364  | 1,719361488 | 0,013764951 | up   | miR-181d |
| FAM102A    | ENSG00000167106  | 1,126963554 | 0,017907286 | up   | miR-181d |
| TSTD1      | ENSG00000215845  | 1,620312363 | 0,003524534 | up   | miR-181d |
| RNF169     | ENSG00000166439  | 1,256306733 | 0,012735885 | up   | miR-181d |
| SPOPL      | ENSG00000144228  | 1,780424306 | 0,02071346  | up   | miR-181d |
| POLR3H     | ENSG00000100413  | 1,568241128 | 0,002517659 | up   | miR-181d |
| SPG11      | ENSG00000104133  | 0,9762998   | 0,018204474 | down | miR-181d |
| DNAJC27    | ENSG00000115137  | 2,343795878 | 0,028744966 | up   | miR-181d |
| SOC5       | ENSG00000274211  | 1,520781363 | 0,016439519 | up   | miR-181d |
| MRPL24     | ENSG00000143314  | 1,211374365 | 0,00508307  | up   | miR-181d |
| ATG2B      | ENSG00000066739  | 1,54603773  | 0,03205266  | up   | miR-181d |
| PIM3       | ENSG00000198355  | 3,156485575 | 0,022370922 | up   | miR-181d |
| SHMT2      | ENSG00000182199  | 1,260494467 | 0,005670872 | up   | miR-181d |
| BLVRA      | ENSG00000106605  | 1,290485978 | 0,019870259 | up   | miR-181d |
| PGGT1B     | ENSG00000164219  | 0,68695849  | 0,027444056 | down | miR-181d |
| SLC15A1    | ENSG00000088386  | 3,060545057 | 0,020428828 | up   | miR-181d |
| PLEKHA3    | ENSG00000116095  | 2,181457858 | 0,008906573 | up   | miR-181d |
| TUBB4B     | ENSG00000188229  | 2,072664333 | 0,004372911 | up   | miR-181d |
| GNPTG      | ENSG00000090581  | 0,988265298 | 0,027809337 | down | miR-181d |

|              |                  |             |             |      |          |
|--------------|------------------|-------------|-------------|------|----------|
| PPP4R2       | ENSG00000163605  | 1,666906832 | 0,009909376 | up   | miR-181d |
| DLD          | ENSG000000091140 | 1,197450482 | 0,011416125 | up   | miR-181d |
| YY1AP1       | ENSG00000163374  | 2,001917751 | 0,000208328 | up   | miR-181d |
| URI1         | ENSG00000105176  | 1,088643581 | 0,010681219 | up   | miR-181d |
| CD101        | ENSG00000134256  | 2,495503978 | 0,028544665 | up   | miR-181d |
| STXBP3       | ENSG00000116266  | 1,316679437 | 0,018881831 | up   | miR-181d |
| LINC02256    | ENSG00000289083  | 3,129886321 | 0,015538652 | up   | miR-181d |
| TRAPPC9      | ENSG00000167632  | 1,954581326 | 0,01003787  | up   | miR-181d |
| ETS2         | ENSG00000157557  | 3,464348672 | 0,002908378 | up   | miR-181d |
| RAD50        | ENSG00000113522  | 0,387932149 | 0,031560392 | down | miR-181d |
| EAPP         | ENSG00000129518  | 1,260002452 | 0,008258692 | up   | miR-181d |
| TSN          | ENSG00000211460  | 1,421818333 | 0,008060775 | up   | miR-181d |
| MRPS18C      | ENSG00000163319  | 1,192528544 | 0,033255274 | up   | miR-181d |
| CMTM8        | ENSG00000170293  | 1,955001221 | 0,012049135 | up   | miR-181d |
| COPS5        | ENSG00000121022  | 0,862816807 | 0,038395373 | down | miR-181d |
| UQCRQ        | ENSG00000164405  | 1,225326197 | 0,017549945 | up   | miR-181d |
| BAG5         | ENSG00000166170  | 1,093129779 | 0,025611563 | up   | miR-181d |
| TMEM59       | ENSG00000116209  | 1,183676435 | 0,000893231 | up   | miR-181d |
| EPN2         | ENSG00000072134  | 1,265223181 | 0,008633823 | up   | miR-181d |
| XPO7         | ENSG00000130227  | 1,309769705 | 0,000667841 | up   | miR-181d |
| ZDHHC7       | ENSG00000153786  | 1,022148954 | 0,039961681 | up   | miR-181d |
| ATP5C1       | ENSG00000165629  | 1,234903743 | 0,04496031  | up   | miR-181d |
| PRKE         | ENSG00000171132  | 1,659806169 | 0,000715375 | up   | miR-181d |
| CCDC90B      | ENSG00000137500  | 1,111910649 | 0,029100755 | up   | miR-181d |
| MAGED2       | ENSG00000102316  | 2,273854997 | 0,016687504 | up   | miR-181d |
| GORASP2      | ENSG00000115806  | 0,87410278  | 0,009537366 | down | miR-181d |
| HNRNPUL2     | ENSG00000214753  | 1,693531822 | 0,025693773 | up   | miR-181d |
| LMNTD2       | ENSG00000185522  | 1,58967002  | 0,007486077 | up   | miR-181d |
| NKRF         | ENSG00000186416  | 2,342015755 | 0,024045738 | up   | miR-181d |
| YBX1         | ENSG00000065978  | 1,594475673 | 0,007533535 | up   | miR-181d |
| MXD4         | ENSG00000123933  | 0,672136179 | 0,044149528 | down | miR-181d |
| ZNF559       | ENSG00000188321  | 1,434213429 | 0,045951304 | up   | miR-181d |
| RSAD1        | ENSG00000136444  | 2,233728786 | 0,036454509 | up   | miR-181d |
| EPB41L4A-AS1 | ENSG00000224032  | 1,285515309 | 0,040704471 | up   | miR-181d |
| HOOK1        | ENSG00000134709  | 1,393524897 | 0,034336886 | up   | miR-181d |
| SNX5         | ENSG00000089006  | 2,295238929 | 0,046590335 | up   | miR-181d |
| STAU2        | ENSG00000040341  | 0,880014297 | 0,008551756 | down | miR-181d |
| RNF208       | ENSG00000212864  | 1,39477123  | 0,034524933 | up   | miR-181d |
| RECQL        | ENSG00000004700  | 0,671896856 | 0,023093454 | down | miR-181d |
| C16orf87     | ENSG00000155330  | 2,016209693 | 0,004061021 | up   | miR-181d |
| TXNDC17      | ENSG00000129235  | 1,660779376 | 0,002393075 | up   | miR-181d |
| NUDC         | ENSG00000090273  | 0,986730104 | 0,006783604 | down | miR-181d |
| NDUFV2       | ENSG00000178127  | 1,036364927 | 0,016895529 | up   | miR-181d |
| CDH1         | ENSG00000039068  | 1,886384943 | 0,03562583  | up   | miR-181d |
| RNPS1        | ENSG00000205937  | 0,950594221 | 0,019675908 | down | miR-181d |
| C19orf53     | ENSG00000104979  | 1,685785051 | 0,030537614 | up   | miR-181d |
| HSD17B8      | ENSG00000204228  | 1,502666519 | 0,007218316 | up   | miR-181d |
| NCOA3        | ENSG00000124151  | 1,524622333 | 0,027723509 | up   | miR-181d |
| PRKAB2       | ENSG00000131791  | 1,076270702 | 0,00880945  | up   | miR-181d |
| NRD1         | ENSG00000078618  | 2,174710581 | 0,025869913 | up   | miR-181d |
| TRMT10C      | ENSG00000174173  | 1,019103409 | 0,049904587 | up   | miR-181d |
| PMF1         | ENSG00000160783  | 1,215647987 | 0,011158878 | up   | miR-181d |
| NINJ1        | ENSG00000131669  | 1,202320692 | 0,022898152 | up   | miR-181d |
| HNMT         | ENSG00000150540  | 1,365755171 | 0,017609379 | up   | miR-181d |
| ITPR3        | ENSG00000096433  | 1,511393604 | 0,001971078 | up   | miR-181d |
| EXOSC6       | ENSG00000223496  | 0,89386962  | 0,033356802 | down | miR-181d |
| CARS2        | ENSG00000134905  | 1,339070855 | 0,001737814 | up   | miR-181d |
| PFKFB3       | ENSG00000170525  | 1,183828065 | 0,033188536 | up   | miR-181d |
| RPL29        | ENSG00000162244  | 1,20188787  | 0,040612455 | up   | miR-181d |
| PHF20        | ENSG00000025293  | 0,997284442 | 0,039562387 | down | miR-181d |
| FASTKD2      | ENSG00000118246  | 1,522488982 | 0,016781654 | up   | miR-181d |
| SNRPE        | ENSG00000182004  | 1,167824995 | 0,045238438 | up   | miR-181d |
| ZNF317       | ENSG00000130803  | 2,600614034 | 0,00646461  | up   | miR-181d |
| ZBTB10       | ENSG00000205189  | 1,125870003 | 0,006849642 | up   | miR-181d |
| COA4         | ENSG00000181924  | 1,476203698 | 0,004867328 | up   | miR-181d |
| ACAA1        | ENSG00000060971  | 0,844038095 | 0,014191564 | down | miR-181d |
| IPO8         | ENSG00000133704  | 1,631538424 | 0,000513529 | up   | miR-181d |
| DAG1         | ENSG00000173402  | 1,084680423 | 0,044154039 | up   | miR-181d |
| RRP8         | ENSG00000132275  | 1,105752666 | 0,034950634 | up   | miR-181d |
| IDH1         | ENSG00000138413  | 1,026079649 | 0,010285815 | up   | miR-181d |
| JADE1        | ENSG00000077684  | 1,342435267 | 0,000612444 | up   | miR-181d |
| ZNHIT2       | ENSG00000174276  | 1,770995708 | 0,038158423 | up   | miR-181d |
| TOMM70A      | ENSG00000154174  | 2,201705943 | 4,87458E-05 | up   | miR-181d |
| MTIF3        | ENSG00000122033  | 0,640564859 | 0,033022732 | down | miR-181d |
| EIF2S2       | ENSG00000125977  | 1,059916752 | 0,023893879 | up   | miR-181d |
| ATP6V1A      | ENSG00000114573  | 1,362390977 | 0,007865431 | up   | miR-181d |
| PEX13        | ENSG00000162928  | 1,92112596  | 0,001995668 | up   | miR-181d |

|            |                 |             |             |      |          |
|------------|-----------------|-------------|-------------|------|----------|
| TMEM8A     | ENSG00000129925 | 0,819603309 | 0,029860199 | down | miR-181d |
| KIAA0753   | ENSG00000198920 | 1,461071532 | 0,003657583 | up   | miR-181d |
| NUP88      | ENSG00000108559 | 1,093427745 | 0,045579406 | up   | miR-181d |
| HIST1H2BG  | ENSG00000273802 | 2,744652894 | 0,023118589 | up   | miR-181d |
| NCOA4      | ENSG00000266412 | 1,053136972 | 0,04142315  | up   | miR-181d |
| ZNF3       | ENSG00000166526 | 1,823474315 | 0,001497371 | up   | miR-181d |
| SPIN1      | ENSG00000106723 | 0,815264514 | 0,030147965 | down | miR-181d |
| TMEM263    | ENSG00000151135 | 1,139023329 | 0,008568334 | up   | miR-181d |
| CSAD       | ENSG00000139631 | 0,84834237  | 0,00269149  | down | miR-181d |
| BCL9       | ENSG00000116128 | 1,333479369 | 0,033879445 | up   | miR-181d |
| RPS3A      | ENSG00000145425 | 2,938957134 | 0,036897773 | up   | miR-181d |
| TTC38      | ENSG00000075234 | 1,524090503 | 0,017713305 | up   | miR-181d |
| MARVELD1   | ENSG00000155254 | 1,173479459 | 0,030586474 | up   | miR-181d |
| FAM8A1     | ENSG00000137414 | 2,27428261  | 5,43864E-05 | up   | miR-181d |
| CFAP97     | ENSG00000164323 | 0,403022274 | 0,03815118  | down | miR-181d |
| NCBP2-AS2  | ENSG00000270170 | 2,183211476 | 0,004671635 | up   | miR-181d |
| GJB1       | ENSG00000169562 | 1,233484328 | 0,047648383 | up   | miR-181d |
| CHERP      | ENSG00000085872 | 1,549235817 | 0,0007597   | up   | miR-181d |
| WDR76      | ENSG00000092470 | 2,748487484 | 0,027349805 | up   | miR-181d |
| UXS1       | ENSG00000115652 | 1,063308229 | 0,008771475 | up   | miR-181d |
| PYROXD1    | ENSG00000121350 | 2,021420907 | 0,005718512 | up   | miR-181d |
| PPP1R18    | ENSG00000146112 | 1,5820762   | 0,019169695 | up   | miR-181d |
| ICAM1      | ENSG00000090339 | 0,991707097 | 0,032589959 | down | miR-181d |
| PCDHGA10   | ENSG00000253846 | 2,162794536 | 0,040514268 | up   | miR-181d |
| TDP2       | ENSG00000111802 | 0,921862733 | 0,046087841 | down | miR-181d |
| PYGO2      | ENSG00000163348 | 1,003794132 | 0,023414472 | up   | miR-181d |
| THUMPD1    | ENSG00000066654 | 0,674702034 | 0,033810697 | down | miR-181d |
| HNF4A      | ENSG00000101076 | 1,816826545 | 0,031052861 | up   | miR-181d |
| PSMB1      | ENSG00000080818 | 0,725687796 | 0,0103958   | down | miR-181d |
| MIB1       | ENSG00000101752 | 1,012855202 | 0,001322894 | up   | miR-181d |
| ATIC       | ENSG00000138363 | 0,749941497 | 0,009867319 | down | miR-181d |
| POLR1D     | ENSG00000186184 | 1,169275837 | 0,004470172 | up   | miR-181d |
| GNG12      | ENSG00000172380 | 0,931260796 | 0,018408579 | down | miR-181d |
| EBLN3P     | ENSG00000281649 | 0,81178768  | 0,008076102 | down | miR-181d |
| INTS7      | ENSG00000143493 | 2,242887554 | 0,033421192 | up   | miR-181d |
| CNN3       | ENSG00000117519 | 1,437560586 | 0,044330311 | up   | miR-181d |
| TANC1      | ENSG00000115183 | 0,944724735 | 0,001539519 | down | miR-181d |
| PRDX6      | ENSG00000117592 | 1,298873039 | 0,026416143 | up   | miR-181d |
| TRABD      | ENSG00000170638 | 2,256245514 | 0,010520166 | up   | miR-181d |
| LMOD1      | ENSG00000163431 | 2,00642921  | 0,029724888 | up   | miR-181d |
| TMEM204    | ENSG00000131634 | 2,192311811 | 0,014462883 | up   | miR-181d |
| CCDC25     | ENSG00000147419 | 0,802761708 | 0,033497915 | down | miR-181d |
| AADAC      | ENSG00000114771 | 2,345135066 | 0,046051262 | up   | miR-181d |
| GFM1       | ENSG00000168827 | 1,220188556 | 0,006067231 | up   | miR-181d |
| MRPL43     | ENSG00000055950 | 1,263454071 | 0,018672884 | up   | miR-181d |
| FOSL2      | ENSG00000075426 | 3,312270672 | 0,032021154 | up   | miR-181d |
| EGLN2      | ENSG00000269858 | 1,002650114 | 0,033974097 | up   | miR-181d |
| B4GALT4    | ENSG00000121578 | 1,807379354 | 0,048536141 | up   | miR-181d |
| FLT1       | ENSG00000102755 | 1,253408562 | 0,001864042 | up   | miR-181d |
| GSTO1      | ENSG00000148834 | 0,83136107  | 0,042514866 | down | miR-181d |
| TMEM9      | ENSG00000116857 | 1,077878908 | 0,008792786 | up   | miR-181d |
| ALKBH5     | ENSG00000091542 | 2,038597193 | 0,002316866 | up   | miR-181d |
| RAB8A      | ENSG00000167461 | 0,662372876 | 0,037061639 | down | miR-181d |
| AC107068.1 | ENSG00000259959 | 2,207749126 | 0,031636727 | up   | miR-181d |
| VEZF1      | ENSG00000136451 | 0,69363828  | 0,013088321 | down | miR-181d |
| ADCY9      | ENSG00000162104 | 1,638454098 | 0,044598849 | up   | miR-181d |
| ZUFSP      | ENSG00000153975 | 2,128195745 | 0,015330007 | up   | miR-181d |
| FAM65A     | ENSG00000039523 | 1,733105354 | 0,025490277 | up   | miR-181d |
| MLH3       | ENSG00000119684 | 0,873120622 | 0,00152708  | down | miR-181d |
| LRRC42     | ENSG00000116212 | 2,041157322 | 0,021786944 | up   | miR-181d |
| TTPA       | ENSG00000137561 | 2,366006915 | 0,04773851  | up   | miR-181d |
| HTRA2      | ENSG00000115317 | 1,564657329 | 0,007746304 | up   | miR-181d |
| IGFBP3     | ENSG00000146674 | 1,562212369 | 0,025904152 | up   | miR-181d |
| PLLP       | ENSG00000102934 | 1,715617419 | 0,002356252 | up   | miR-181d |
| ALDH3A2    | ENSG00000072210 | 1,66509191  | 0,001666844 | up   | miR-181d |
| MARVELD2   | ENSG00000152939 | 1,902185182 | 0,013807422 | up   | miR-181d |
| PDE9A      | ENSG00000160191 | 1,596500266 | 0,008812323 | up   | miR-181d |
| CYLD       | ENSG00000083799 | 1,200517329 | 0,001001691 | up   | miR-181d |
| MYLK       | ENSG00000065534 | 1,50375813  | 0,001520737 | up   | miR-181d |
| HIPK1      | ENSG00000163349 | 0,988254896 | 0,04637244  | down | miR-181d |
| ANGEL2     | ENSG00000174606 | 1,466815869 | 0,007801306 | up   | miR-181d |
| CYP4V2     | ENSG00000145476 | 2,559470391 | 0,001409872 | up   | miR-181d |
| CHP1       | ENSG00000187446 | 1,557167796 | 0,005460359 | up   | miR-181d |
| GBAS       | ENSG00000146729 | 1,093683092 | 0,012154957 | up   | miR-181d |
| SPPL2B     | ENSG00000005206 | 0,742351303 | 0,032428263 | down | miR-181d |
| SNX6       | ENSG00000129515 | 1,731572144 | 0,007913146 | up   | miR-181d |
| UBQLN1     | ENSG00000135018 | 1,565879243 | 0,000147662 | up   | miR-181d |



|              |                 |              |             |      |          |
|--------------|-----------------|--------------|-------------|------|----------|
| RBMXL1       | ENSG00000213516 | 1,368865139  | 0,036109531 | up   | miR-181d |
| UBE2V2       | ENSG00000169139 | 0,827763119  | 0,038959945 | down | miR-181d |
| RNF181       | ENSG00000168894 | 1,438330204  | 0,000394106 | up   | miR-181d |
| RALB         | ENSG00000144118 | 1,370235615  | 0,011166367 | up   | miR-181d |
| PRKCDBP      | ENSG00000170955 | 1,649852599  | 0,013756523 | up   | miR-181d |
| TPP2         | ENSG00000134900 | 1,063160211  | 0,003212825 | up   | miR-181d |
| CBR1         | ENSG00000159228 | 1,663192653  | 0,010065655 | up   | miR-181d |
| FH           | ENSG00000091483 | 2,027039142  | 0,00784401  | up   | miR-181d |
| ZBTB4        | ENSG00000174282 | 1,125345618  | 0,014060068 | up   | miR-181d |
| GPR108       | ENSG00000125734 | 0,941933382  | 0,017850816 | down | miR-181d |
| VPS4A        | ENSG00000132612 | 1,151830191  | 0,029278332 | up   | miR-181d |
| PDHA1        | ENSG00000131828 | 1,206179554  | 0,01044099  | up   | miR-181d |
| SP3          | ENSG00000172845 | 1,596179051  | 0,008034138 | up   | miR-181d |
| SOCS6        | ENSG00000170677 | 1,455930592  | 0,007315852 | up   | miR-181d |
| SNAP25       | ENSG00000132639 | 4,088488853  | 0,020512031 | up   | miR-181d |
| WASL         | ENSG00000106299 | 0,879617498  | 0,022786217 | down | miR-181d |
| MLYCD        | ENSG00000103150 | 1,387927506  | 0,007391048 | up   | miR-181d |
| NDUFAB1      | ENSG00000004779 | 0,696859049  | 0,023484666 | down | miR-181d |
| PDLIM1       | ENSG00000107438 | 2,748748457  | 0,005785915 | up   | miR-181d |
| PSMF1        | ENSG00000125818 | 0,945850058  | 0,019131325 | down | miR-181d |
| AARS         | ENSG00000090861 | 1,124099094  | 0,009246908 | up   | miR-181d |
| CNOT1        | ENSG00000125107 | 1,333569449  | 0,020432922 | up   | miR-181d |
| FGFR2        | ENSG00000066468 | 2,023913079  | 0,003260822 | up   | miR-181d |
| FAM161B      | ENSG00000156050 | 2,773434129  | 0,024760345 | up   | miR-181d |
| RABL2A       | ENSG00000144134 | 1,794564611  | 0,010069147 | up   | miR-181d |
| FRK          | ENSG00000111816 | 2,316547478  | 0,009277824 | up   | miR-181d |
| SLC35F6      | ENSG00000213699 | 1,03411582   | 0,008551281 | up   | miR-181d |
| ARID1A       | ENSG00000117713 | 1,723546146  | 0,041413824 | up   | miR-181d |
| ASXL2        | ENSG00000143970 | 0,720186475  | 0,016995167 | down | miR-181d |
| MMADHC       | ENSG00000168288 | 0,912100235  | 0,012898338 | down | miR-181d |
| CSNK1D       | ENSG00000141551 | 0,9847214    | 0,002564869 | down | miR-181d |
| CLK1         | ENSG00000013441 | 1,065763266  | 0,002166509 | up   | miR-181d |
| SH3BGRL      | ENSG00000131171 | 1,936229004  | 0,003017975 | up   | miR-181d |
| UPF1         | ENSG00000005007 | 1,627399165  | 0,009516235 | up   | miR-181d |
| RFFL         | ENSG00000092871 | 1,154708936  | 0,011162624 | up   | miR-181d |
| PIGF         | ENSG00000151665 | 2,447818255  | 0,043664639 | up   | miR-181d |
| LOC100996717 | ENSG00000271383 | 1,480428338  | 0,023845324 | up   | miR-181d |
| CCDC125      | ENSG00000183323 | 1,606411832  | 0,001072215 | up   | miR-181d |
| ADI1         | ENSG00000182551 | 1,807924806  | 0,002852647 | up   | miR-181d |
| BAG3         | ENSG00000151929 | 1,861782802  | 0,007946259 | up   | miR-181d |
| FKBP4        | ENSG00000004478 | 1,219121783  | 0,017548775 | up   | miR-181d |
| FBXO17       | ENSG00000269190 | 1,731364821  | 0,033658156 | up   | miR-181d |
| CERS6        | ENSG00000172292 | 1,324454705  | 0,025710601 | up   | miR-181d |
| ELMO3        | ENSG00000102890 | 2,419434017  | 0,020354791 | up   | miR-181d |
| SLIRP        | ENSG00000119705 | 1,267650614  | 0,006348542 | up   | miR-181d |
| CCDC58       | ENSG00000160124 | 1,73954935   | 0,023314021 | up   | miR-181d |
| P4HTM        | ENSG00000178467 | 1,139556713  | 0,041704308 | up   | miR-181d |
| SHMT1        | ENSG00000176974 | 1,974897195  | 0,018380155 | up   | miR-181d |
| AP1G1        | ENSG00000166747 | 1,029345081  | 0,012723669 | up   | miR-181d |
| GPR137B      | ENSG00000077585 | 1,462237874  | 0,023511208 | up   | miR-181d |
| FAM63B       | ENSG00000128923 | 0,839485648  | 0,048669462 | down | miR-181d |
| ETFB         | ENSG00000105379 | 1,046259975  | 0,006339732 | up   | miR-181d |
| KDM3A        | ENSG00000115548 | 1,47854336   | 0,031912684 | up   | miR-181d |
| CYB561       | ENSG00000008283 | 1,986196099  | 0,00232097  | up   | miR-181d |
| ECHDC1       | ENSG00000093144 | 1,109317549  | 0,017132362 | up   | miR-181d |
| TMC4         | ENSG00000167608 | 1,348267086  | 0,004694983 | up   | miR-181d |
| SGCB         | ENSG00000163069 | 1,292019367  | 0,009346623 | up   | miR-181d |
| CS           | ENSG00000062485 | 0,850152105  | 0,016901983 | down | miR-181d |
| SENP3        | ENSG00000161956 | 0,770634304  | 0,024260157 | down | miR-181d |
| ZBTB33       | ENSG00000177485 | 2,353883874  | 5,94909E-05 | up   | miR-181d |
| PLXNB1       | ENSG00000164050 | 1,477813195  | 0,020712866 | up   | miR-181d |
| LYPLA2       | ENSG00000011009 | 1,179963917  | 0,010634491 | up   | miR-181d |
| PPP1CB       | ENSG00000213639 | 0,968640088  | 0,026999055 | down | miR-181d |
| SEMA5B       | ENSG00000082684 | 2,890546595  | 0,023230343 | up   | miR-181d |
| GOT2         | ENSG00000125166 | 0,874809179  | 0,031062855 | down | miR-181d |
| MYEOV2       | ENSG00000172428 | 0,930400034  | 0,036016145 | down | miR-181d |
| HIBCH        | ENSG00000198130 | 0,864986951  | 0,004356442 | down | miR-181d |
| FBXO11       | ENSG00000138081 | 0,311252844  | 0,048852543 | down | miR-181d |
| STX3         | ENSG00000166900 | 0,769986871  | 0,020581892 | down | miR-181d |
| RNF145       | ENSG00000145860 | 2,545386919  | 0,000406507 | up   | miR-181d |
| SYNJ2BP      | ENSG00000213463 | 0,975643716  | 0,006708645 | down | miR-181d |
| BRK1         | ENSG00000254999 | 1,402544477  | 0,014245828 | up   | miR-181d |
| CCL3         | ENSG00000277632 | -0,974773859 | 0,035920541 | down | miR-181d |
| NAA50        | ENSG00000121579 | 1,277316418  | 0,009339194 | up   | miR-181d |
| SAP18        | ENSG00000150459 | 1,114836347  | 0,011902974 | up   | miR-181d |
| TMEM177      | ENSG00000144120 | 1,47220369   | 0,013058613 | up   | miR-181d |
| NBR1         | ENSG00000188554 | 0,809179283  | 0,014775598 | down | miR-181d |

|            |                 |             |             |      |          |
|------------|-----------------|-------------|-------------|------|----------|
| ARMC1      | ENSG00000104442 | 0,761623778 | 0,033531454 | down | miR-181d |
| UBAC2      | ENSG00000134882 | 1,175227963 | 0,040749366 | up   | miR-181d |
| HOOK2      | ENSG00000095066 | 0,791205576 | 0,034741403 | down | miR-181d |
| GCN1       | ENSG00000089154 | 0,76429846  | 0,025159917 | down | miR-181d |
| YES1       | ENSG00000176105 | 1,019035675 | 0,015320535 | up   | miR-181d |
| HAUS6      | ENSG00000147874 | 1,208610793 | 0,025413104 | up   | miR-181d |
| RIOK1      | ENSG00000124784 | 0,735534478 | 0,042003799 | down | miR-181d |
| SERPINA5   | ENSG00000188488 | 3,403559681 | 0,021293696 | up   | miR-181d |
| ACAD9      | ENSG00000177646 | 1,587223715 | 0,005991056 | up   | miR-181d |
| FAM103A1   | ENSG00000169612 | 1,580294531 | 0,043252466 | up   | miR-181d |
| STX6       | ENSG00000135823 | 1,366216508 | 0,008151731 | up   | miR-181d |
| BLOC1S1    | ENSG00000135441 | 1,178574474 | 0,030454659 | up   | miR-181d |
| SMAD4      | ENSG00000141646 | 1,614826174 | 0,006680703 | up   | miR-181d |
| ATP6AP1    | ENSG00000071553 | 6,114678798 | 0,029274583 | up   | miR-181d |
| NUCB2      | ENSG00000070081 | 1,40488331  | 0,002300154 | up   | miR-181d |
| NR2F6      | ENSG00000160113 | 0,833268763 | 0,010603953 | down | miR-181d |
| DCTPP1     | ENSG00000179958 | 1,409149112 | 0,017179932 | up   | miR-181d |
| KIAA1804   | ENSG00000143674 | 1,833947404 | 0,009526103 | up   | miR-181d |
| SLC39A6    | ENSG00000141424 | 0,7452337   | 0,034001914 | down | miR-181d |
| PTEN       | ENSG00000171862 | 0,847670346 | 0,02344528  | down | miR-181d |
| ZER1       | ENSG00000160445 | 1,16992298  | 0,029744935 | up   | miR-181d |
| LRCH3      | ENSG00000186001 | 0,801547572 | 0,009280485 | down | miR-181d |
| MAL2       | ENSG00000147676 | 1,396501347 | 0,006713001 | up   | miR-181d |
| ZNF581     | ENSG00000171425 | 1,575320992 | 0,010362108 | up   | miR-181d |
| GLO1       | ENSG00000124767 | 1,193980093 | 0,027634209 | up   | miR-181d |
| MAP3K1     | ENSG00000095015 | 1,019763664 | 0,036984888 | up   | miR-181d |
| RNF10      | ENSG00000022840 | 1,340161288 | 0,014207028 | up   | miR-181d |
| RAP2C      | ENSG00000123728 | 1,685632268 | 0,009493148 | up   | miR-181d |
| PARG       | ENSG00000227345 | 1,84387664  | 0,014508616 | up   | miR-181d |
| BCAR1      | ENSG00000050820 | 1,362659066 | 0,006774395 | up   | miR-181d |
| DIEXF      | ENSG00000117597 | 1,15445577  | 0,031795495 | up   | miR-181d |
| NPTN       | ENSG00000156642 | 1,223402563 | 0,030390971 | up   | miR-181d |
| FZR1       | ENSG00000105325 | 1,39467975  | 0,006862886 | up   | miR-181d |
| ATP6V1E2   | ENSG00000250565 | 1,796134646 | 0,010735182 | up   | miR-181d |
| NMD3       | ENSG00000169251 | 0,972903786 | 0,013189919 | down | miR-181d |
| ERI2       | ENSG00000196678 | 1,592548703 | 0,022603402 | up   | miR-181d |
| CDIPT      | ENSG00000103502 | 1,189665318 | 0,004017982 | up   | miR-181d |
| CNIH4      | ENSG00000143771 | 1,292783298 | 0,013148455 | up   | miR-181d |
| CDYL2      | ENSG00000166446 | 1,323684939 | 0,031110865 | up   | miR-181d |
| TSNAX      | ENSG00000116918 | 1,056306444 | 0,005607754 | up   | miR-181d |
| TKFC       | ENSG00000149476 | 1,463453718 | 0,011144778 | up   | miR-181d |
| TMEM126B   | ENSG00000171204 | 1,283853919 | 0,030679409 | up   | miR-181d |
| FAM83H     | ENSG00000180921 | 1,284067415 | 0,001746915 | up   | miR-181d |
| MRPL55     | ENSG00000162910 | 1,097950528 | 0,001166808 | up   | miR-181d |
| TET2       | ENSG00000168769 | 0,894571328 | 0,013634668 | down | miR-181d |
| CHMP4C     | ENSG00000164695 | 2,381640669 | 0,000688363 | up   | miR-181d |
| ACOX1      | ENSG00000161533 | 0,930369197 | 0,002058269 | down | miR-181d |
| LBR        | ENSG00000143815 | 1,510599868 | 0,001264822 | up   | miR-181d |
| LRP6       | ENSG00000070018 | 0,903867363 | 0,043194597 | down | miR-181d |
| FKBP5      | ENSG00000096060 | 1,493276804 | 0,028871754 | up   | miR-181d |
| SLC27A5    | ENSG00000083807 | 4,047579633 | 0,013315607 | up   | miR-181d |
| ASUN       | ENSG00000064102 | 1,229237207 | 0,003461351 | up   | miR-181d |
| TANC2      | ENSG00000170921 | 1,096431856 | 0,014934456 | up   | miR-181d |
| ASAP2      | ENSG00000151693 | 1,872246979 | 0,000752394 | up   | miR-181d |
| SH3BP5L    | ENSG00000175137 | 1,787435732 | 0,016843229 | up   | miR-181d |
| SMAD2      | ENSG00000175387 | 0,535722458 | 0,045210057 | down | miR-181d |
| PPM1B      | ENSG00000138032 | 1,422389572 | 0,005349114 | up   | miR-181d |
| P3H2       | ENSG00000090530 | 1,428914386 | 0,048854404 | up   | miR-181d |
| CPSF6      | ENSG00000111605 | 1,14651594  | 0,017926739 | up   | miR-181d |
| SCOC       | ENSG00000153130 | 0,753353926 | 0,028895367 | down | miR-181d |
| RBBP5      | ENSG00000117222 | 1,459953204 | 0,007242247 | up   | miR-181d |
| ZNF189     | ENSG00000136870 | 1,641544121 | 0,04157333  | up   | miR-181d |
| CARD10     | ENSG00000100065 | 0,940077679 | 0,037044496 | down | miR-181d |
| FAM127B    | ENSG00000203950 | 1,70064262  | 0,017725539 | up   | miR-181d |
| ATG9A      | ENSG00000198925 | 1,024572466 | 0,00737135  | up   | miR-181d |
| SNRNP48    | ENSG00000168566 | 1,038062316 | 0,003726746 | up   | miR-181d |
| GAS2L1     | ENSG00000185340 | 1,21534984  | 0,031807129 | up   | miR-181d |
| MED6       | ENSG00000133997 | 1,135001431 | 0,014472465 | up   | miR-181d |
| ARHGAP32   | ENSG00000134909 | 1,012587245 | 0,048452286 | up   | miR-181d |
| CHKB       | ENSG00000100288 | 2,123559122 | 0,002670186 | up   | miR-181d |
| EIF4EBP3   | ENSG00000243056 | 1,006570965 | 0,037324498 | up   | miR-181d |
| METTL7B    | ENSG00000170439 | 1,628760566 | 0,043306216 | up   | miR-181d |
| C17orf89   | ENSG00000224877 | 1,15066987  | 0,001561775 | up   | miR-181d |
| MAPK6      | ENSG00000069956 | 1,021136348 | 0,00990017  | up   | miR-181d |
| CNOT11     | ENSG00000158435 | 1,201958906 | 0,002126188 | up   | miR-181d |
| GPALPP1    | ENSG00000133114 | 1,234410554 | 0,016195347 | up   | miR-181d |
| AC011498.4 | ENSG00000267385 | 2,841186127 | 0,026526439 | up   | miR-181d |

|            |                 |             |             |      |          |
|------------|-----------------|-------------|-------------|------|----------|
| CACFD1     | ENSG00000160325 | 0,985001894 | 0,039479126 | down | miR-181d |
| YWHAG      | ENSG00000170027 | 0,227675137 | 0,009293421 | down | miR-181d |
| EIF2AK1    | ENSG00000086232 | 1,075334586 | 0,014071533 | up   | miR-181d |
| PGRMC1     | ENSG00000101856 | 0,625219883 | 0,006217419 | down | miR-181d |
| TMEM176B   | ENSG00000106565 | 1,352713532 | 0,038647137 | up   | miR-181d |
| ING5       | ENSG00000168395 | 1,335014103 | 0,006374599 | up   | miR-181d |
| FOXM1      | ENSG00000111206 | 2,256096142 | 0,016601083 | up   | miR-181d |
| SENP5      | ENSG00000119231 | 1,302806201 | 0,022814803 | up   | miR-181d |
| CUL3       | ENSG00000036257 | 0,76874823  | 0,041337063 | down | miR-181d |
| SLC25A5    | ENSG00000005022 | 1,269002515 | 0,023459749 | up   | miR-181d |
| FXYD5      | ENSG00000089327 | 1,415728084 | 0,009626006 | up   | miR-181d |
| CETN2      | ENSG00000147400 | 1,388200952 | 0,002610313 | up   | miR-181d |
| PFKP       | ENSG00000067057 | 1,187134979 | 0,002454359 | up   | miR-181d |
| DNPEP      | ENSG00000123992 | 0,771005283 | 0,022014815 | down | miR-181d |
| ETV4       | ENSG00000175832 | 2,222030713 | 0,00085083  | up   | miR-181d |
| PSEN2      | ENSG00000143801 | 1,978025611 | 0,00345363  | up   | miR-181d |
| C1orf115   | ENSG00000162817 | 1,412800654 | 0,041637643 | up   | miR-181d |
| COPZ1      | ENSG00000111481 | 1,872440325 | 0,000883075 | up   | miR-181d |
| PCYOX1     | ENSG00000116005 | 1,044143322 | 0,005786289 | up   | miR-181d |
| PPP2CA     | ENSG00000113575 | 1,973049231 | 0,000329428 | up   | miR-181d |
| MFAP1      | ENSG00000140259 | 0,927827697 | 0,02705952  | down | miR-181d |
| ATOX1      | ENSG00000177556 | 0,797053274 | 0,034313631 | down | miR-181d |
| FAM168B    | ENSG00000152102 | 1,90878369  | 0,000608487 | up   | miR-181d |
| FAM161A    | ENSG00000170264 | 1,464841686 | 0,026404169 | up   | miR-181d |
| ACSS3      | ENSG00000111058 | 2,198207971 | 0,025243308 | up   | miR-181d |
| CYP4F11    | ENSG00000171903 | 1,559630652 | 0,048788437 | up   | miR-181d |
| FAM195A    | ENSG00000172366 | 1,21422653  | 0,041111041 | up   | miR-181d |
| QTRTD1     | ENSG00000151576 | 1,186535088 | 0,007727855 | up   | miR-181d |
| TMEM74B    | ENSG00000125895 | 2,787605035 | 0,033357218 | up   | miR-181d |
| AC093726.1 | ENSG00000272760 | 1,969440682 | 0,010281965 | up   | miR-181d |
| ID1        | ENSG00000067064 | 1,626562994 | 0,010719444 | up   | miR-181d |
| FAM73B     | ENSG00000148343 | 1,413220759 | 0,012192592 | up   | miR-181d |
| DEDD       | ENSG00000158796 | 1,622753499 | 0,002331102 | up   | miR-181d |
| PLS1       | ENSG00000120756 | 1,167770489 | 0,014264694 | up   | miR-181d |
| LPCAT1     | ENSG00000153395 | 2,01073532  | 0,00507144  | up   | miR-181d |
| POLR2I     | ENSG00000105258 | 1,323845869 | 0,009407056 | up   | miR-181d |
| ZBED6      | ENSG00000257315 | 0,922858542 | 0,020549691 | down | miR-181d |
| PPP4R1     | ENSG00000154845 | 1,371752586 | 0,027868332 | up   | miR-181d |
| ZXDB       | ENSG00000198455 | 2,964140824 | 0,034085334 | up   | miR-181d |
| POLDIP2    | ENSG00000004142 | 0,992173446 | 0,007861699 | down | miR-181d |
| ZNF43      | ENSG00000198521 | 1,169635202 | 0,040788717 | up   | miR-181d |
| CLDN12     | ENSG00000157224 | 1,189737039 | 0,020125253 | up   | miR-181d |
| BPHL       | ENSG00000137274 | 1,445550034 | 0,016383202 | up   | miR-181d |
| GATM       | ENSG00000171766 | 1,697961132 | 0,012527295 | up   | miR-181d |
| HADH       | ENSG00000138796 | 1,782433604 | 0,048967057 | up   | miR-181d |
| PCBD1      | ENSG00000166228 | 1,164695316 | 0,009288563 | up   | miR-181d |
| DAPK3      | ENSG00000167657 | 1,245865984 | 0,00453236  | up   | miR-181d |
| YIPF2      | ENSG00000130733 | 0,965686875 | 0,005277664 | down | miR-181d |
| DCAKD      | ENSG00000172992 | 1,349911527 | 0,011095597 | up   | miR-181d |
| WAC-AS1    | ENSG00000254635 | 1,398703983 | 0,001908847 | up   | miR-181d |
| COA5       | ENSG00000183513 | 0,9897671   | 0,03325429  | down | miR-181d |
| TIMM23     | ENSG00000265354 | 1,251556672 | 0,02309299  | up   | miR-181d |
| DCUN1D1    | ENSG00000043093 | 1,418321923 | 0,009348452 | up   | miR-181d |
| KCNK1      | ENSG00000135750 | 1,326411115 | 0,049174558 | up   | miR-181d |
| LRRC16A    | ENSG00000079691 | 1,247435646 | 0,007072645 | up   | miR-181d |
| EFHD2      | ENSG00000142634 | 5,980755605 | 0,011956144 | up   | miR-181d |
| PSMB5      | ENSG00000100804 | 1,211489544 | 0,001619353 | up   | miR-181d |
| GUCY1A2    | ENSG00000152402 | 1,496202695 | 0,047757357 | up   | miR-181d |
| BCOR       | ENSG00000183337 | 2,049522507 | 0,000293342 | up   | miR-181d |
| UXT        | ENSG00000126756 | 1,359673524 | 0,017248471 | up   | miR-181d |
| ATXN1L     | ENSG00000224470 | 1,564146818 | 0,049388681 | up   | miR-181d |
| FLVCR1     | ENSG00000162769 | 3,222126364 | 0,001009783 | up   | miR-181d |
| ATP2C1     | ENSG0000017260  | 1,25267688  | 0,02643113  | up   | miR-181d |
| NMT2       | ENSG00000152465 | 1,181291416 | 0,042295936 | up   | miR-181d |
| MRPS35     | ENSG00000061794 | 0,851362553 | 0,022164111 | down | miR-181d |
| BOK        | ENSG00000176720 | 1,345634283 | 0,046772381 | up   | miR-181d |
| TBC1D15    | ENSG00000121749 | 1,798143701 | 0,002778386 | up   | miR-181d |
| ZNF37A     | ENSG00000075407 | 1,097810795 | 0,014646677 | up   | miR-181d |
| ADCK3      | ENSG00000163050 | 2,127198907 | 0,009303019 | up   | miR-181d |
| C4orf3     | ENSG00000164096 | 1,039037661 | 0,009743621 | up   | miR-181d |
| NVL        | ENSG00000143748 | 0,90218791  | 0,001758954 | down | miR-181d |
| KIF3A      | ENSG00000131437 | 0,736836513 | 0,041510858 | down | miR-181d |
| LANCL2     | ENSG00000132434 | 2,850264152 | 0,002115982 | up   | miR-181d |
| ALG10B     | ENSG00000175548 | 2,700927538 | 0,020805593 | up   | miR-181d |
| IPO5       | ENSG00000065150 | 1,000686183 | 0,011706232 | up   | miR-181d |
| ABHD2      | ENSG00000140526 | 1,211093139 | 0,018040649 | up   | miR-181d |
| MTL5       | ENSG00000132749 | 1,81692538  | 0,034150297 | up   | miR-181d |

|            |                  |             |             |      |          |
|------------|------------------|-------------|-------------|------|----------|
| DGCR8      | ENSG00000128191  | 1,167524455 | 0,040229455 | up   | miR-181d |
| POMP       | ENSG00000132963  | 1,999001666 | 0,002292922 | up   | miR-181d |
| FTCD       | ENSG00000160282  | 4,259564626 | 0,02409988  | up   | miR-181d |
| ARL6IP6    | ENSG00000177917  | 2,909583443 | 0,013889766 | up   | miR-181d |
| SLC39A9    | ENSG0000029364   | 1,017033513 | 0,026894581 | up   | miR-181d |
| NOXA1      | ENSG00000188747  | 2,935458907 | 0,003642664 | up   | miR-181d |
| RANBP10    | ENSG00000141084  | 1,60684905  | 0,03636765  | up   | miR-181d |
| IFT172     | ENSG00000138002  | 2,02245675  | 0,027682489 | up   | miR-181d |
| HIST1H2AC  | ENSG00000180573  | 1,585973361 | 0,008164463 | up   | miR-181d |
| MYH14      | ENSG00000105357  | 1,381021409 | 0,012321143 | up   | miR-181d |
| KIAA1147   | ENSG00000257093  | 0,968263189 | 0,045174366 | down | miR-181d |
| C2orf54    | ENSG00000172478  | 2,770351109 | 0,031216883 | up   | miR-181d |
| PAFAH2     | ENSG00000158006  | 1,7361959   | 0,031582497 | up   | miR-181d |
| INO80B     | ENSG00000115274  | 1,436098763 | 0,026084474 | up   | miR-181d |
| CEP295     | ENSG00000166004  | 0,800232089 | 0,008461892 | down | miR-181d |
| SMS        | ENSG00000102172  | 1,360468894 | 0,037978456 | up   | miR-181d |
| TLE1       | ENSG00000196781  | 1,760868941 | 0,001660547 | up   | miR-181d |
| CCDC71     | ENSG00000177352  | 2,522663857 | 0,026558644 | up   | miR-181d |
| RAB3GAP1   | ENSG00000115839  | 1,129624691 | 0,022901379 | up   | miR-181d |
| NPM2       | ENSG00000158806  | 2,827801684 | 0,007095591 | up   | miR-181d |
| RILP       | ENSG00000167705  | 1,893405612 | 0,023685291 | up   | miR-181d |
| S100A16    | ENSG00000188643  | 0,687264579 | 0,034418597 | down | miR-181d |
| FAM214B    | ENSG00000005238  | 2,088617603 | 0,005633086 | up   | miR-181d |
| ILVLB      | ENSG00000105135  | 1,416941249 | 0,0389949   | up   | miR-181d |
| AKR1A1     | ENSG00000117448  | 3,650890005 | 0,008477016 | up   | miR-181d |
| PPTC7      | ENSG00000196850  | 1,245184889 | 0,018239068 | up   | miR-181d |
| DNM1L      | ENSG000000087470 | 1,326624527 | 0,005076844 | up   | miR-181d |
| PAXIP1-AS1 | ENSG00000273344  | 2,632845522 | 0,034028157 | up   | miR-181d |
| PTPN3      | ENSG00000070159  | 1,193343241 | 0,043940488 | up   | miR-181d |
| TSPAN15    | ENSG00000099282  | 1,830147036 | 0,01896983  | up   | miR-181d |
| EPHX1      | ENSG00000143819  | 1,160828235 | 0,018663184 | up   | miR-181d |
| LGR4       | ENSG00000205213  | 1,894868976 | 0,001687751 | up   | miR-181d |
| SNX20      | ENSG00000167208  | 1,607893552 | 0,046521766 | up   | miR-181d |
| GSPT2      | ENSG00000189369  | 2,28254518  | 0,000939272 | up   | miR-181d |
| NUDT5      | ENSG00000165609  | 1,02853537  | 0,046445369 | up   | miR-181d |
| PAAF1      | ENSG00000175575  | 1,283323302 | 0,040628618 | up   | miR-181d |
| STK16      | ENSG00000115661  | 1,311834408 | 0,032586216 | up   | miR-181d |
| ANKHD1     | ENSG00000131503  | 1,978170323 | 0,00379399  | up   | miR-181d |
| EPB41L5    | ENSG00000115109  | 2,104739587 | 0,00521256  | up   | miR-181d |
| C19orf70   | ENSG00000174917  | 2,336770395 | 0,000396666 | up   | miR-181d |
| GPRIN1     | ENSG00000169258  | 1,500695797 | 0,04161825  | up   | miR-181d |
| ZNF136     | ENSG00000196646  | 1,351294774 | 0,042142485 | up   | miR-181d |
| ZNF785     | ENSG00000197162  | 1,264160541 | 0,029966742 | up   | miR-181d |
| DPY19L3    | ENSG00000178904  | 2,299425149 | 0,008060218 | up   | miR-181d |
| UGT2B15    | ENSG00000196620  | 5,107280648 | 0,009359291 | up   | miR-181d |
| SNAP23     | ENSG00000092531  | 0,963136082 | 0,032500436 | down | miR-181d |
| FNDCA      | ENSG00000115226  | 2,767793555 | 0,017934871 | up   | miR-181d |
| MAP1LC3A   | ENSG00000101460  | 1,500006139 | 0,015848255 | up   | miR-181d |
| SLC35C2    | ENSG00000080189  | 1,227414897 | 0,005780229 | up   | miR-181d |
| TOR4A      | ENSG00000198113  | 1,402942423 | 0,002326462 | up   | miR-181d |
| TMEM185B   | ENSG00000226479  | 2,788251591 | 0,005061664 | up   | miR-181d |
| SELENBP1   | ENSG00000143416  | 1,247856849 | 0,027500199 | up   | miR-181d |
| MPND       | ENSG00000008382  | 1,101122    | 0,03884098  | up   | miR-181d |
| ACD        | ENSG00000102977  | 1,297137833 | 0,043187094 | up   | miR-181d |
| C12orf75   | ENSG00000235162  | 2,294201931 | 0,014470063 | up   | miR-181d |
| RPH3AL     | ENSG00000181031  | 2,004851876 | 0,02296749  | up   | miR-181d |
| MST1       | ENSG00000173531  | 2,402831545 | 0,002611091 | up   | miR-181d |
| TMEM44     | ENSG00000145014  | 1,410767246 | 0,033058505 | up   | miR-181d |
| NADK2      | ENSG00000152620  | 1,610034602 | 0,006139488 | up   | miR-181d |
| FCN3       | ENSG00000142748  | 3,996147053 | 0,022884934 | up   | miR-181d |
| FBXL4      | ENSG00000112234  | 2,299904154 | 0,009351038 | up   | miR-181d |
| ARSE       | ENSG00000157399  | 2,592612113 | 0,014478371 | up   | miR-181d |
| ZNF593     | ENSG00000142684  | 1,421504045 | 0,015711746 | up   | miR-181d |
| AL451165.2 | ENSG00000272288  | 3,524663667 | 0,027005112 | up   | miR-181d |
| AP000253.1 | ENSG00000234509  | 2,011206123 | 0,020331465 | up   | miR-181d |
| USP49      | ENSG00000164663  | 1,803424246 | 0,009396919 | up   | miR-181d |
| FAM66C     | ENSG00000226711  | 2,826426147 | 0,025871951 | up   | miR-181d |
| C6orf141   | ENSG00000197261  | 2,722048184 | 0,018186057 | up   | miR-181d |
| ARHGFE5    | ENSG00000050327  | 1,475173138 | 0,00519372  | up   | miR-181d |
| E2F6       | ENSG00000169016  | 2,613199678 | 0,012698672 | up   | miR-181d |
| SRP9       | ENSG00000143742  | 2,208405984 | 0,004978933 | up   | miR-181d |
| BEND3      | ENSG00000178409  | 2,733026039 | 0,031759733 | up   | miR-181d |
| IRX3       | ENSG00000177508  | 3,368409169 | 0,026088529 | up   | miR-181d |
| PRELID2    | ENSG00000186314  | 2,420905083 | 0,042898762 | up   | miR-181d |
| SYBU       | ENSG00000147642  | 2,399854954 | 0,046017766 | up   | miR-181d |
| TMEM92     | ENSG00000167105  | 2,652941798 | 0,00925936  | up   | miR-181d |
| CCER2      | ENSG00000262484  | 2,136252983 | 0,018019918 | up   | miR-181d |

|            |                  |              |             |      |          |
|------------|------------------|--------------|-------------|------|----------|
| AC099518.2 | ENSG00000261357  | 2,873612886  | 0,041231811 | up   | miR-181d |
| AC007938.3 | ENSG00000270953  | 1,645936042  | 0,035896685 | up   | miR-181d |
| IGFBP1     | ENSG00000146678  | 3,493989558  | 0,043314798 | up   | miR-181d |
| AMY2B      | ENSG00000240038  | 3,007226928  | 0,022498535 | up   | miR-181d |
| ZNF256     | ENSG00000152454  | 1,902589131  | 0,030992526 | up   | miR-181d |
| IRX2       | ENSG00000170561  | -2,219227689 | 0,027127374 | down | miR-181d |
| NDUFAF1    | ENSG00000137806  | -1,749292937 | 0,028868975 | down | miR-181d |
| UBR7       | ENSG00000012963  | -0,943443378 | 0,044063877 | down | miR-181d |
| TRMT13     | ENSG00000122435  | 1,014936289  | 0,00262015  | up   | miR-181d |
| HKR1       | ENSG00000181666  | 1,074937757  | 0,036616697 | up   | miR-181d |
| SLC25A46   | ENSG00000164209  | 0,821755905  | 0,036866508 | down | miR-181d |
| AHDC1      | ENSG00000126705  | 1,096615908  | 0,043832093 | up   | miR-181d |
| SCRIB      | ENSG00000180900  | 1,229440381  | 0,01484774  | up   | miR-181d |
| TGFBR1     | ENSG00000106799  | 0,898099058  | 0,03820927  | down | miR-181d |
| FAM188A    | ENSG00000148481  | 1,469486971  | 0,032149856 | up   | miR-181d |
| ZNF865     | ENSG00000261221  | 1,609226956  | 0,030975863 | up   | miR-181d |
| SFXN4      | ENSG00000183605  | 0,938373199  | 0,025382742 | down | miR-181d |
| TMEM258    | ENSG00000134825  | 2,174157197  | 0,005717558 | up   | miR-181d |
| NTAN1      | ENSG00000157045  | 1,390392133  | 0,032144365 | up   | miR-181d |
| MEDC29     | ENSG00000006322  | 0,968362018  | 0,030341336 | down | miR-181d |
| DAZAP2     | ENSG00000183283  | 0,958624585  | 0,022334843 | down | miR-181d |
| TM7SF3     | ENSG00000064115  | 1,027963618  | 0,037565886 | up   | miR-181d |
| KLHL29     | ENSG00000119771  | 1,380776688  | 0,039905282 | up   | miR-181d |
| NCOA2      | ENSG00000140396  | 1,209885083  | 0,008193269 | up   | miR-181d |
| COX6A1     | ENSG00000111775  | 1,860986504  | 0,004583172 | up   | miR-181d |
| PROSER2    | ENSG00000148426  | 2,695253738  | 0,013925986 | up   | miR-181d |
| C11orf54   | ENSG00000182919  | 0,91623587   | 0,019654729 | down | miR-181d |
| RAB3D      | ENSG00000105514  | 1,28904312   | 0,007153195 | up   | miR-181d |
| RNF7       | ENSG00000114125  | 0,940364122  | 0,0238932   | down | miR-181d |
| FAM199X    | ENSG00000123575  | 1,500812218  | 0,032450952 | up   | miR-181d |
| ATF2       | ENSG00000115966  | 0,860793232  | 0,016677902 | down | miR-181d |
| IQCK       | ENSG00000174628  | 1,633558685  | 0,018579507 | up   | miR-181d |
| AKAP6      | ENSG00000151320  | -1,931772052 | 0,027162879 | down | miR-181c |
| PRNCR1     | ENSG00000282961  | -2,009969631 | 0,045485028 | down | miR-181c |
| AC104653.1 | ENSG00000228857  | -2,005209213 | 0,02356805  | down | miR-181c |
| FANCD2     | ENSG00000144554  | -1,083069618 | 0,016078332 | down | miR-181c |
| HOXA10     | ENSG00000253293  | -2,111729969 | 0,004235417 | down | miR-181c |
| RGMA       | ENSG00000182175  | -2,049181329 | 0,004453382 | down | miR-181c |
| MECR       | ENSG00000116353  | -1,021514705 | 0,03388029  | down | miR-181c |
| HEATR3     | ENSG00000155393  | -1,355498802 | 0,009713255 | down | miR-181c |
| MICAL3     | ENSG00000243156  | -0,634310385 | 0,034267878 | down | miR-181c |
| MRFAP1     | ENSG00000179010  | 1,589747492  | 0,001908633 | up   | miR-181c |
| DAZAP2     | ENSG00000183283  | 1,177683559  | 0,008961337 | up   | miR-181c |
| ZMYND15    | ENSG00000141497  | -1,981098697 | 0,000490311 | down | miR-181c |
| AC007336.1 | ENSG00000261997  | -1,574796703 | 0,032491248 | down | miR-181c |
| GPRC5A     | ENSG00000013588  | -3,023103224 | 0,008361812 | down | miR-181c |
| NCKAP1L    | ENSG00000123338  | -0,676263194 | 0,005158316 | down | miR-181c |
| FADS1      | ENSG00000149485  | -0,530335714 | 0,003615083 | down | miR-181c |
| ZC3H3      | ENSG00000014164  | -1,124686709 | 0,025581964 | down | miR-181c |
| TMEM106B   | ENSG00000106460  | 0,470828107  | 0,026168789 | down | miR-181c |
| UNC13D     | ENSG000000092929 | -1,043729666 | 0,028825832 | down | miR-181c |
| MAGI1      | ENSG00000151276  | -0,359885459 | 0,036449192 | down | miR-181c |
| PPP2R5B    | ENSG00000068971  | -1,194434435 | 0,00185214  | down | miR-181c |
| SGK223     | ENSG00000275342  | -1,044053374 | 0,012152841 | down | miR-181c |
| WWOX       | ENSG00000186153  | -0,874084524 | 0,021923647 | down | miR-181c |
| TAF1A      | ENSG00000143498  | -1,580541364 | 0,038319446 | down | miR-181c |
| GLI3       | ENSG00000106571  | -1,239844838 | 0,005600817 | down | miR-181c |
| SIRT1      | ENSG00000096717  | -0,820927497 | 0,049736872 | down | miR-181c |
| TACC2      | ENSG00000138162  | -1,442901785 | 0,000351475 | down | miR-181c |
| ZNF714     | ENSG00000160352  | -0,866379648 | 0,027641781 | down | miR-181c |
| AL133367.1 | ENSG00000260285  | -2,358449073 | 0,002149438 | down | miR-181c |
| TUBE1      | ENSG00000074935  | -1,258350823 | 0,036317702 | down | miR-181c |
| ADCY4      | ENSG00000129467  | -0,878453697 | 0,023560913 | down | miR-181c |
| AC109466.1 | ENSG00000241956  | -2,424501671 | 0,030773224 | down | miR-181c |
| TOP3A      | ENSG00000177302  | -0,845879788 | 0,0054525   | down | miR-181c |
| ZCCHC8     | ENSG00000033030  | -0,579175195 | 0,033177819 | down | miR-181c |
| NEK8       | ENSG00000160602  | -0,928802524 | 0,021164068 | down | miR-181c |
| LINC00971  | ENSG00000242641  | -1,8427385   | 0,039451674 | down | miR-181c |
| FAM84A     | ENSG00000162981  | -1,152845728 | 0,009610163 | down | miR-181c |
| JAKMIP2    | ENSG00000176049  | -1,544124787 | 0,032779682 | down | miR-181c |
| KCNK3      | ENSG00000171303  | -2,507245912 | 0,016327473 | down | miR-181c |
| AC005523.2 | ENSG00000269604  | -2,770808653 | 0,041631778 | down | miR-181c |
| AC003986.2 | ENSG00000232821  | -3,408963642 | 0,02579972  | down | miR-181c |
| TENM3      | ENSG00000218336  | -1,756877978 | 0,018506512 | down | miR-181c |
| LRRC15     | ENSG00000172061  | -1,625396363 | 0,032070807 | down | miR-181c |
| TSPAN1     | ENSG00000117472  | -1,741085035 | 0,043496501 | down | miR-181c |
| CBLC       | ENSG00000142273  | -2,04555127  | 0,002658917 | down | miR-181c |

|            |                 |              |             |      |          |
|------------|-----------------|--------------|-------------|------|----------|
| RIMS2      | ENSG00000176406 | -2,221890397 | 0,04843935  | down | miR-181c |
| MUC16      | ENSG00000181143 | -4,798299211 | 0,001827155 | down | miR-181c |
| DEFB118    | ENSG00000131068 | -2,95222908  | 0,022199375 | down | miR-181c |
| AL158163.2 | ENSG00000278601 | -1,107177751 | 0,029401311 | down | miR-181c |
| UQCRHL     | ENSG00000233954 | -1,671239692 | 0,039003095 | down | miR-181c |
| AL137786.1 | ENSG00000258702 | -3,371800499 | 0,019774283 | down | miR-181c |
| MAEL       | ENSG00000143194 | -3,584388044 | 0,018088178 | down | miR-181c |
| VILL       | ENSG00000136059 | -1,939889012 | 0,011391523 | down | miR-181c |
| MORN3      | ENSG00000139714 | -1,661031952 | 0,019080468 | down | miR-181c |
| CDC42EP5   | ENSG00000167617 | -1,236592403 | 0,018920004 | down | miR-181c |
| SCIN       | ENSG00000006747 | -2,015351453 | 0,009921003 | down | miR-181c |
| CLUU1      | ENSG00000257127 | -2,711221354 | 0,01712959  | down | miR-181c |
| PLEKHS1    | ENSG00000148735 | -1,670477352 | 0,02078108  | down | miR-181c |
| PPP6       | ENSG00000130226 | -2,784443422 | 0,009599699 | down | miR-181c |
| Z95114.1   | ENSG00000279217 | -2,639662619 | 0,01719844  | down | miR-181c |
| SLC4A8     | ENSG00000050438 | -1,806151802 | 0,038444767 | down | miR-181c |
| AC025048.4 | ENSG00000267416 | -2,853321644 | 0,006923565 | down | miR-181c |
| C1orf110   | ENSG00000185860 | -2,095906422 | 0,020450634 | down | miR-181c |
| AL031595.2 | ENSG00000280011 | -2,615938612 | 0,042148623 | down | miR-181c |
| SLC35G3    | ENSG00000164729 | -2,394023856 | 0,04965902  | down | miR-181c |
| SLC6A20    | ENSG00000163817 | -2,003173189 | 0,017234117 | down | miR-181c |
| NOS1       | ENSG00000089250 | -2,537581969 | 0,005706949 | down | miR-181c |
| LINC01224  | ENSG00000269416 | -3,214687305 | 0,010385083 | down | miR-181c |
| POU2F3     | ENSG00000137709 | -1,720588777 | 0,044913341 | down | miR-181c |
| CTCF1      | ENSG00000124092 | -1,468795522 | 0,013227429 | down | miR-181c |
| DLGAP1     | ENSG00000170579 | -2,657488175 | 0,034976374 | down | miR-181c |
| EML5       | ENSG00000165521 | -3,036695407 | 0,004981814 | down | miR-181c |
| GABRB1     | ENSG00000163288 | -3,3786742   | 0,018328048 | down | miR-181c |
| MIR133A1HG | ENSG00000265142 | -3,174186367 | 0,044761409 | down | miR-181c |
| SH3BGR     | ENSG00000185437 | 1,168872703  | 0,010345268 | up   | miR-181c |
| CSTA       | ENSG00000121552 | 1,319066229  | 0,032235251 | up   | miR-181c |
| PPP1R1C    | ENSG00000150722 | 1,840250703  | 0,047295573 | up   | miR-181c |
| APOBEC3H   | ENSG00000100298 | 1,395897118  | 0,023922939 | up   | miR-181c |
| KLLN       | ENSG00000227268 | 1,100700228  | 0,020042371 | up   | miR-181c |
| INTS12     | ENSG00000138785 | 2,642006933  | 0,000272122 | up   | miR-181c |
| E2F7       | ENSG00000165891 | 3,469250952  | 0,042485381 | up   | miR-181c |
| SYNGR1     | ENSG00000100321 | 1,814415566  | 0,008906679 | up   | miR-181c |
| TAS2R19    | ENSG00000212124 | 2,237434245  | 0,000180253 | up   | miR-181c |
| VSIG8      | ENSG00000243284 | 1,312748323  | 0,037371744 | up   | miR-181c |
| AC104964.4 | ENSG00000272505 | 0,929444699  | 0,029584945 | down | miR-181c |
| LINC02015  | ENSG00000231574 | 2,408889579  | 0,049592627 | up   | miR-181c |
| LOH12CR2   | ENSG00000205791 | 1,06456623   | 0,008487958 | up   | miR-181c |
| LM07-AS1   | ENSG00000261105 | 1,048936883  | 0,04410998  | up   | miR-181c |
| RTN4RL1    | ENSG00000185924 | 3,148875288  | 0,004245395 | up   | miR-181c |
| PPM1J      | ENSG00000155367 | 1,77771223   | 0,005940734 | up   | miR-181c |
| AC078846.1 | ENSG00000273329 | 2,18852378   | 0,004498879 | up   | miR-181c |
| BTBD1      | ENSG00000064726 | 2,235387324  | 0,002103204 | up   | miR-181c |
| TMEM132E   | ENSG00000181291 | 2,217725909  | 0,035827056 | up   | miR-181c |
| ACTL10     | ENSG00000288649 | 2,109266139  | 0,010690187 | up   | miR-181c |
| TAF9B      | ENSG00000187325 | 2,056732934  | 0,029111533 | up   | miR-181c |
| PCDHGA7    | ENSG00000253537 | 1,386686454  | 0,01595457  | up   | miR-181c |
| NHEJ1      | ENSG00000187736 | 1,273473518  | 0,049642316 | up   | miR-181c |
| CDK5R1     | ENSG00000176749 | 1,513174471  | 0,030984195 | up   | miR-181c |
| BATF3      | ENSG00000123685 | 2,095370643  | 0,002528503 | up   | miR-181c |
| LINC01637  | ENSG00000237476 | 1,893004336  | 0,011985432 | up   | miR-181c |
| COQ10A     | ENSG00000135469 | 1,206655755  | 0,022714394 | up   | miR-181c |
| SHC4       | ENSG00000185634 | 1,452713352  | 0,015600377 | up   | miR-181c |
| NR2F1-AS1  | ENSG00000237187 | 1,158457196  | 0,03575727  | up   | miR-181c |
| ZNF253     | ENSG00000256771 | 1,951511282  | 0,007892454 | up   | miR-181c |
| CSF2RB     | ENSG00000100368 | 1,122698693  | 0,045813077 | up   | miR-181c |
| ZNF175     | ENSG00000105497 | 1,886486335  | 0,001658427 | up   | miR-181c |
| DEFB1      | ENSG00000164825 | 3,069023485  | 0,000852893 | up   | miR-181c |
| GCLC       | ENSG00000001084 | 1,866997594  | 0,000153393 | up   | miR-181c |
| NAP1L2     | ENSG00000186462 | 1,206743368  | 0,008650437 | up   | miR-181c |
| AMOTL1     | ENSG00000166025 | 0,734630646  | 0,046112195 | down | miR-181c |
| SHANK2     | ENSG00000162105 | 1,183851707  | 0,020293612 | up   | miR-181c |
| RBAK       | ENSG00000146587 | 0,767192931  | 0,026480424 | down | miR-181c |
| PARVB      | ENSG00000188677 | 0,933573094  | 0,009572233 | down | miR-181c |
| NGFR       | ENSG00000064300 | 1,794103295  | 0,011639756 | up   | miR-181c |
| HIST1H3E   | ENSG00000274750 | 2,113251721  | 0,024049233 | up   | miR-181c |
| KLHL12     | ENSG00000117153 | 1,850639991  | 0,000950324 | up   | miR-181c |
| KRT86      | ENSG00000170442 | 2,031906648  | 0,008678888 | up   | miR-181c |
| C16orf59   | ENSG00000162062 | 1,133297042  | 0,036696775 | up   | miR-181c |
| N6AMT1     | ENSG00000156239 | 3,135352006  | 4,89297E-06 | up   | miR-181c |
| SPRY4      | ENSG00000187678 | 1,064719363  | 0,014941911 | up   | miR-181c |
| AC008105.1 | ENSG00000233175 | 1,159237     | 0,014506648 | up   | miR-181c |
| GALNT18    | ENSG00000110328 | 2,150593493  | 0,003572127 | up   | miR-181c |

|            |                 |             |             |      |          |
|------------|-----------------|-------------|-------------|------|----------|
| NABP1      | ENSG00000173559 | 0,729993809 | 0,014822309 | down | miR-181c |
| PAK6       | ENSG00000137843 | 1,560978772 | 0,034469602 | up   | miR-181c |
| AC245884.8 | ENSG00000267838 | 1,417927885 | 0,020915521 | up   | miR-181c |
| ASB16-AS1  | ENSG00000267080 | 1,47370079  | 0,013590075 | up   | miR-181c |
| NUAK2      | ENSG00000163545 | 1,915644711 | 0,016303748 | up   | miR-181c |
| PREX2      | ENSG00000046889 | 1,650033045 | 0,002348074 | up   | miR-181c |
| PHOSPHO2   | ENSG00000144362 | 1,173808251 | 0,033342765 | up   | miR-181c |
| HCFC2      | ENSG00000111727 | 1,754181317 | 0,000136361 | up   | miR-181c |
| MDF1C      | ENSG00000135272 | 1,522030297 | 0,002477971 | up   | miR-181c |
| NUP50      | ENSG00000093000 | 1,536189049 | 0,000109255 | up   | miR-181c |
| LINC01671  | ENSG00000225431 | 2,034024422 | 0,017996565 | up   | miR-181c |
| AC020915.3 | ENSG00000268516 | 2,142281557 | 0,001252332 | up   | miR-181c |
| METR1      | ENSG00000103260 | 1,182537195 | 0,025958301 | up   | miR-181c |
| ZNF92      | ENSG00000146757 | 1,465954282 | 0,010617876 | up   | miR-181c |
| MDP1       | ENSG00000213920 | 1,461254766 | 0,006775865 | up   | miR-181c |
| TNFRSF10B  | ENSG00000120889 | 0,983724795 | 0,021484854 | down | miR-181c |
| C9orf156   | ENSG00000136932 | 1,590272586 | 0,000747791 | up   | miR-181c |
| RMND5A     | ENSG00000153561 | 1,246724784 | 0,012438535 | up   | miR-181c |
| ZNF781     | ENSG00000196381 | 1,646704636 | 0,002228179 | up   | miR-181c |
| DGCR5      | ENSG00000237517 | 2,072556397 | 0,022247517 | up   | miR-181c |
| ISG20      | ENSG00000172183 | 1,841753239 | 0,001689456 | up   | miR-181c |
| SNX33      | ENSG00000173548 | 0,934487868 | 0,006522482 | down | miR-181c |
| NRAV       | ENSG00000248008 | 2,240405139 | 0,015293455 | up   | miR-181c |
| SNAI3      | ENSG00000185669 | 1,299120116 | 0,01570163  | up   | miR-181c |
| HYLS1      | ENSG00000198331 | 2,111608562 | 0,013455981 | up   | miR-181c |
| DRAM1      | ENSG00000136048 | 1,017323859 | 0,02848422  | up   | miR-181c |
| NOB1       | ENSG00000141101 | 1,145734168 | 0,009130755 | up   | miR-181c |
| ZNF837     | ENSG00000152475 | 1,611495092 | 0,006125673 | up   | miR-181c |
| DNAL4      | ENSG00000100246 | 1,943155329 | 0,000871214 | up   | miR-181c |
| FAM173A    | ENSG00000103254 | 1,051038371 | 0,022489832 | up   | miR-181c |
| PLCB1      | ENSG00000182621 | 2,018285272 | 0,000965616 | up   | miR-181c |
| AC107464.3 | ENSG00000272927 | 2,313161025 | 0,00198097  | up   | miR-181c |
| RHO1       | ENSG00000116574 | 1,417437898 | 0,003764219 | up   | miR-181c |
| RPUSD3     | ENSG00000156990 | 1,354416533 | 0,007780699 | up   | miR-181c |
| TP53TG1    | ENSG00000182165 | 1,100166344 | 0,027112182 | up   | miR-181c |
| AC027307.2 | ENSG00000267317 | 1,402957805 | 0,024067711 | up   | miR-181c |
| USP32      | ENSG00000170832 | 1,068163382 | 0,039125541 | up   | miR-181c |
| OXSM       | ENSG00000151093 | 2,188987314 | 0,000108272 | up   | miR-181c |
| SUPV3L1    | ENSG00000156502 | 0,987924844 | 0,011298021 | down | miR-181c |
| TRAPP4     | ENSG00000196655 | 0,918410787 | 0,033574709 | down | miR-181c |
| RBM12B     | ENSG00000183808 | 0,80397881  | 0,020804803 | down | miR-181c |
| THBD       | ENSG00000178726 | 1,457969794 | 0,015770507 | up   | miR-181c |
| TMEM38B    | ENSG00000095209 | 1,534948106 | 0,015869904 | up   | miR-181c |
| PRKAA2     | ENSG00000162409 | 1,354213939 | 0,023400494 | up   | miR-181c |
| GALNT11    | ENSG00000178234 | 0,717224687 | 0,042215311 | down | miR-181c |
| ARHGEF17   | ENSG00000110237 | 1,186430743 | 0,001157408 | up   | miR-181c |
| KLF13      | ENSG00000169926 | 1,186339949 | 0,010130229 | up   | miR-181c |
| PNMAL1     | ENSG00000182013 | 3,198008717 | 0,012338925 | up   | miR-181c |
| HACD4      | ENSG00000188921 | 1,807701807 | 0,000859644 | up   | miR-181c |
| MRPL10     | ENSG00000159111 | 0,819035894 | 0,024284198 | down | miR-181c |
| CHST4      | ENSG00000140835 | 4,308850737 | 0,018516166 | up   | miR-181c |
| CREB5      | ENSG00000146592 | 1,447907493 | 0,001004646 | up   | miR-181c |
| GJA4       | ENSG00000187513 | 1,923819305 | 8,95417E-05 | up   | miR-181c |
| RFX7       | ENSG00000181827 | 0,935681398 | 0,049750812 | down | miR-181c |
| COA1       | ENSG00000106603 | 1,139610178 | 0,021610268 | up   | miR-181c |
| HEXIM2     | ENSG00000168517 | 0,978420326 | 0,040991698 | down | miR-181c |
| SREBF2     | ENSG00000198911 | 0,896280288 | 0,009130299 | down | miR-181c |
| PHC3       | ENSG00000173889 | 1,118767651 | 2,48489E-05 | up   | miR-181c |
| C9orf106   | ENSG00000179082 | 2,142576394 | 0,005897241 | up   | miR-181c |
| MTX2       | ENSG00000128654 | 1,721045425 | 0,006678669 | up   | miR-181c |
| RAB23      | ENSG00000112210 | 1,456864214 | 0,015168855 | up   | miR-181c |
| NEO1       | ENSG00000067141 | 1,562782447 | 0,003595494 | up   | miR-181c |
| GEMIN4     | ENSG00000179409 | 1,08555383  | 0,028269922 | up   | miR-181c |
| RGL1       | ENSG00000143344 | 0,67234784  | 0,047700094 | down | miR-181c |
| EVC2       | ENSG00000173040 | 1,513627716 | 0,033493362 | up   | miR-181c |
| CCND2      | ENSG00000118971 | 0,963410543 | 0,019795462 | down | miR-181c |
| MIF4GD     | ENSG00000125457 | 1,402838836 | 0,006319858 | up   | miR-181c |
| AL513329.1 | ENSG00000227740 | 1,586413301 | 0,0191156   | up   | miR-181c |
| TMEM129    | ENSG00000168936 | 1,170056104 | 0,005007301 | up   | miR-181c |
| POC1A      | ENSG00000164087 | 1,643227333 | 0,011538509 | up   | miR-181c |
| PTAR1      | ENSG00000188647 | 0,815870963 | 0,00563268  | down | miR-181c |
| MAP2K1     | ENSG00000169032 | 3,401726977 | 0,000221033 | up   | miR-181c |
| TGFB3      | ENSG00000069702 | 0,872929896 | 0,03868919  | down | miR-181c |
| AIFM2      | ENSG00000042286 | 1,563173902 | 0,001475557 | up   | miR-181c |
| MORF4L1    | ENSG00000185787 | 1,014676374 | 0,034703547 | up   | miR-181c |
| CSTF2T     | ENSG00000177613 | 1,210897373 | 0,011276023 | up   | miR-181c |
| TMEM42     | ENSG00000169964 | 1,128485633 | 0,025655934 | up   | miR-181c |

|             |                  |             |             |      |          |
|-------------|------------------|-------------|-------------|------|----------|
| SVBP        | ENSG00000177868  | 1,501089107 | 0,001252838 | up   | miR-181c |
| ITGBL1      | ENSG00000198542  | 1,566970602 | 0,003412452 | up   | miR-181c |
| TSC22D3     | ENSG00000157514  | 0,77227675  | 0,047346978 | down | miR-181c |
| SCTR        | ENSG00000080293  | 2,465271611 | 0,029702737 | up   | miR-181c |
| MYO1D       | ENSG00000176658  | 1,303448009 | 0,016469671 | up   | miR-181c |
| SETD7       | ENSG00000145391  | 0,598594209 | 0,030825604 | down | miR-181c |
| JAG1        | ENSG00000101384  | 0,880820406 | 0,028913744 | down | miR-181c |
| CD8B        | ENSG00000172116  | 1,715853855 | 0,017665717 | up   | miR-181c |
| HEG1        | ENSG00000173706  | 0,993134253 | 0,013579433 | down | miR-181c |
| KRBA1       | ENSG00000133619  | 1,613862145 | 0,037148843 | up   | miR-181c |
| ADAMTS16    | ENSG00000145536  | 2,628288721 | 0,038427568 | up   | miR-181c |
| HIPK3       | ENSG00000110422  | 3,131293348 | 6,52496E-08 | up   | miR-181c |
| SURF4       | ENSG00000148248  | 0,634558683 | 0,005796746 | down | miR-181c |
| TDG         | ENSG00000139372  | 0,985667676 | 0,00307206  | down | miR-181c |
| KIAA1191    | ENSG00000122203  | 1,525294613 | 0,000267805 | up   | miR-181c |
| CSorf45     | ENSG00000161010  | 1,15826288  | 0,024408246 | up   | miR-181c |
| RPUSD2      | ENSG00000166133  | 2,189815465 | 0,002168348 | up   | miR-181c |
| FAM174A     | ENSG00000174132  | 1,993733441 | 0,002686274 | up   | miR-181c |
| ZNF823      | ENSG00000197933  | 1,407120782 | 0,017428468 | up   | miR-181c |
| AGPS        | ENSG00000018510  | 1,326368476 | 0,002620616 | up   | miR-181c |
| GZMK        | ENSG00000113088  | 2,288369911 | 0,019898528 | up   | miR-181c |
| FAM50B      | ENSG00000145945  | 2,016927207 | 0,003952831 | up   | miR-181c |
| KIAA1586    | ENSG00000168116  | 1,533350661 | 0,001443363 | up   | miR-181c |
| VTCN1       | ENSG00000134258  | 2,772931722 | 0,03011763  | up   | miR-181c |
| ITFG1       | ENSG00000129636  | 0,639942648 | 0,041221996 | down | miR-181c |
| ZNF529-AS1  | ENSG00000233527  | 1,891904226 | 0,029483376 | up   | miR-181c |
| ZNF90       | ENSG00000213988  | 1,457654773 | 0,009498982 | up   | miR-181c |
| ZKSCAN4     | ENSG00000187626  | 2,090697324 | 0,00797692  | up   | miR-181c |
| SNU13       | ENSG00000100138  | 0,75858761  | 0,000610824 | down | miR-181c |
| TNFAIP8L3   | ENSG00000183578  | 1,450911691 | 0,015757584 | up   | miR-181c |
| KLIF7       | ENSG00000118263  | 0,702819949 | 0,008888813 | down | miR-181c |
| LOXL4       | ENSG00000138131  | 1,84140893  | 0,034137394 | up   | miR-181c |
| TRAFD1      | ENSG00000135148  | 1,024020603 | 0,044739877 | up   | miR-181c |
| ATP5H       | ENSG00000167863  | 1,224451308 | 0,003822939 | up   | miR-181c |
| AMIGO1      | ENSG00000181754  | 1,775084581 | 0,020311658 | up   | miR-181c |
| RNMTL1      | ENSG00000171861  | 1,583919267 | 0,003359491 | up   | miR-181c |
| RAP2A       | ENSG00000125249  | 1,173659866 | 0,037028851 | up   | miR-181c |
| LINC01238_1 | ENSG00000237940  | 1,360430425 | 0,020599735 | up   | miR-181c |
| NTPCR       | ENSG00000135778  | 1,64540089  | 0,001150449 | up   | miR-181c |
| HAAO        | ENSG00000162882  | 1,769002913 | 0,008772395 | up   | miR-181c |
| WBP1        | ENSG00000239779  | 1,202181175 | 0,021254925 | up   | miR-181c |
| PANK3       | ENSG00000120137  | 0,87316538  | 0,006717475 | down | miR-181c |
| ZNF625      | ENSG00000257591  | 1,422406674 | 0,023046406 | up   | miR-181c |
| NIPSNAP1    | ENSG00000184117  | 0,98295666  | 0,016557526 | down | miR-181c |
| ZSCAN23     | ENSG00000187987  | 2,130156184 | 0,018065846 | up   | miR-181c |
| KRT10       | ENSG00000186395  | 1,59191813  | 0,005506047 | up   | miR-181c |
| NDUFAF3     | ENSG00000178057  | 1,012976417 | 0,002945903 | up   | miR-181c |
| CPTP        | ENSG00000224051  | 2,281608871 | 2,83014E-05 | up   | miR-181c |
| GMEB2       | ENSG00000101216  | 1,110759316 | 0,019797142 | up   | miR-181c |
| C1GALT1C1   | ENSG00000171155  | 2,245800124 | 0,000811043 | up   | miR-181c |
| MOSPD3      | ENSG00000106330  | 1,080318621 | 0,009601163 | up   | miR-181c |
| SDF2        | ENSG00000132581  | 1,169743538 | 0,000421476 | up   | miR-181c |
| PPAN        | ENSG00000130810  | 0,913345912 | 0,002867285 | down | miR-181c |
| GNP3        | ENSG00000111231  | 1,98593854  | 0,00854973  | up   | miR-181c |
| FIP1L1      | ENSG00000145216  | 0,59569442  | 0,019977232 | down | miR-181c |
| PRDX3       | ENSG00000165672  | 1,454384524 | 0,004136898 | up   | miR-181c |
| ANP32A      | ENSG00000140350  | 1,023105319 | 0,001211677 | up   | miR-181c |
| TNFSF14     | ENSG00000125735  | 1,660378764 | 0,023587281 | up   | miR-181c |
| CBX2        | ENSG00000173894  | 2,005935515 | 0,040858075 | up   | miR-181c |
| AC006213.2  | ENSG00000267058  | 1,494934185 | 0,03967533  | up   | miR-181c |
| NID2        | ENSG000000087303 | 1,403564355 | 0,006519141 | up   | miR-181c |
| TCAF2       | ENSG00000170379  | 2,224649326 | 0,007264653 | up   | miR-181c |
| PPP1R14A    | ENSG00000167641  | 1,551714132 | 0,008415868 | up   | miR-181c |
| ZNF449      | ENSG00000173275  | 1,652764197 | 0,001072457 | up   | miR-181c |
| SMDT1       | ENSG00000183172  | 1,056566275 | 0,004748055 | up   | miR-181c |
| LCORL       | ENSG00000178177  | 0,972340019 | 0,036221838 | down | miR-181c |
| EC1         | ENSG00000167969  | 0,882119445 | 0,030619824 | down | miR-181c |
| FBXO28      | ENSG00000143756  | 1,377605996 | 0,018902901 | up   | miR-181c |
| LRRC47      | ENSG00000130764  | 1,20924009  | 0,000808423 | up   | miR-181c |
| HBP1        | ENSG00000105856  | 0,906532347 | 0,00113319  | down | miR-181c |
| TMEM121     | ENSG00000184986  | 2,36651558  | 0,008892667 | up   | miR-181c |
| SEC61B      | ENSG00000106803  | 0,839136227 | 0,039927481 | down | miR-181c |
| EPHX3       | ENSG00000105131  | 1,425928323 | 0,01344715  | up   | miR-181c |
| NDUFB9      | ENSG00000147684  | 1,008650228 | 0,003502431 | up   | miR-181c |
| RBM4        | ENSG00000173933  | 1,021505596 | 0,02978876  | up   | miR-181c |
| PLD1        | ENSG00000075651  | 0,912433276 | 0,027074577 | down | miR-181c |
| SSC5D       | ENSG00000179954  | 0,891904764 | 0,019523918 | down | miR-181c |



|            |                 |             |             |      |          |
|------------|-----------------|-------------|-------------|------|----------|
| UPRT       | ENSG00000094841 | 2,257047529 | 0,000439054 | up   | miR-181c |
| ST7-AS1    | ENSG00000227199 | 0,768049753 | 0,021191718 | down | miR-181c |
| GNB2       | ENSG00000172354 | 0,9626323   | 0,017450814 | down | miR-181c |
| NUDT2      | ENSG00000164978 | 1,384616258 | 0,001314697 | up   | miR-181c |
| UNC5B      | ENSG00000107731 | 1,560072656 | 0,000268142 | up   | miR-181c |
| ANKRD54    | ENSG00000100124 | 1,146284509 | 0,012649272 | up   | miR-181c |
| NDUFA4     | ENSG00000189043 | 0,75125458  | 0,012035374 | down | miR-181c |
| ASTN2      | ENSG00000148219 | 1,255174779 | 0,011914147 | up   | miR-181c |
| KCMF1      | ENSG00000176407 | 0,634901404 | 0,045922933 | down | miR-181c |
| HRSP12     | ENSG00000132541 | 1,3638828   | 0,034733479 | up   | miR-181c |
| TRIB3      | ENSG00000101255 | 1,648253946 | 0,031562051 | up   | miR-181c |
| REPIN1     | ENSG00000214022 | 0,856841826 | 0,027443549 | down | miR-181c |
| CHRN1      | ENSG00000170175 | 2,235855118 | 0,005441042 | up   | miR-181c |
| MON2       | ENSG00000061987 | 0,778303252 | 0,01739367  | down | miR-181c |
| HGD        | ENSG00000113924 | 1,518575656 | 0,030979013 | up   | miR-181c |
| RANGRF     | ENSG00000108961 | 1,587981329 | 0,002253841 | up   | miR-181c |
| ATG4C      | ENSG00000125703 | 1,990618815 | 0,000334497 | up   | miR-181c |
| TMEM127    | ENSG00000135956 | 0,959305218 | 0,000719845 | down | miR-181c |
| C5orf24    | ENSG00000181904 | 0,795201912 | 0,016747098 | down | miR-181c |
| PXDC1      | ENSG00000168994 | 1,255207522 | 0,022129114 | up   | miR-181c |
| TEX9       | ENSG00000151575 | 2,02714384  | 0,003200002 | up   | miR-181c |
| CHMP5      | ENSG00000086065 | 1,948965082 | 4,02856E-05 | up   | miR-181c |
| C11orf73   | ENSG00000149196 | 0,927979972 | 0,024532117 | down | miR-181c |
| F2R        | ENSG00000181104 | 1,513759228 | 0,002533531 | up   | miR-181c |
| SNRK       | ENSG00000163788 | 1,272406341 | 0,000482098 | up   | miR-181c |
| IVD        | ENSG00000128928 | 0,736171024 | 0,033492708 | down | miR-181c |
| SMARCA1    | ENSG00000163104 | 0,887433988 | 0,006487204 | down | miR-181c |
| GUCY1A3    | ENSG00000164116 | 1,069308896 | 0,016577155 | up   | miR-181c |
| FECH       | ENSG00000066926 | 1,515139532 | 0,010489396 | up   | miR-181c |
| PAFAH1B1   | ENSG00000007168 | 0,727842038 | 0,027881243 | down | miR-181c |
| C19orf38   | ENSG00000214212 | 1,342341999 | 0,036128611 | up   | miR-181c |
| SHISA9     | ENSG00000237515 | 3,879327112 | 0,017591057 | up   | miR-181c |
| WASF3      | ENSG00000132970 | 1,631334232 | 0,008061677 | up   | miR-181c |
| ODF3B      | ENSG00000177989 | 2,223919278 | 0,000296047 | up   | miR-181c |
| SCAMP1     | ENSG00000085365 | 0,848468321 | 0,021716094 | down | miR-181c |
| CENPP      | ENSG00000188312 | 2,129630561 | 0,001711099 | up   | miR-181c |
| SZRD1      | ENSG00000055070 | 0,835791649 | 0,042522704 | down | miR-181c |
| UGDH       | ENSG00000109814 | 1,230773774 | 0,000779307 | up   | miR-181c |
| SEC24A     | ENSG00000113615 | 1,146060801 | 0,025368581 | up   | miR-181c |
| ADPRHL2    | ENSG00000116863 | 1,655436576 | 0,002667414 | up   | miR-181c |
| SMG7       | ENSG00000116698 | 0,697728787 | 0,035271952 | down | miR-181c |
| CCR2       | ENSG00000121807 | 2,789341113 | 0,002918921 | up   | miR-181c |
| XBP1       | ENSG00000100219 | 1,011698523 | 0,016438842 | up   | miR-181c |
| PITPNB     | ENSG00000180957 | 0,677298559 | 0,026681174 | down | miR-181c |
| FOXJ3      | ENSG00000198815 | 1,183846092 | 0,000740444 | up   | miR-181c |
| SPG21      | ENSG00000090487 | 1,079668104 | 0,010430568 | up   | miR-181c |
| ITGB2      | ENSG00000160255 | 1,226805021 | 0,003553102 | up   | miR-181c |
| GLIS3      | ENSG00000107249 | 0,782304383 | 0,001013325 | down | miR-181c |
| NDUFA7     | ENSG00000267855 | 2,509032876 | 1,33206E-05 | up   | miR-181c |
| SCNM1      | ENSG00000163156 | 0,783959167 | 0,02277139  | down | miR-181c |
| SNRPB2     | ENSG00000125870 | 0,918814402 | 0,017915011 | down | miR-181c |
| NSUN6      | ENSG00000241058 | 0,862893463 | 0,038837003 | down | miR-181c |
| CUL4A      | ENSG00000139842 | 0,673885911 | 0,03449122  | down | miR-181c |
| DOK1       | ENSG00000115325 | 1,804276237 | 0,002699005 | up   | miR-181c |
| IFNAR1     | ENSG00000142166 | 0,590236013 | 0,026773906 | down | miR-181c |
| RPL39L     | ENSG00000163923 | 1,602685197 | 0,022578942 | up   | miR-181c |
| TBC1D2     | ENSG00000095383 | 2,721136071 | 0,016895377 | up   | miR-181c |
| IL1RAP     | ENSG00000196083 | 1,427273441 | 0,006032225 | up   | miR-181c |
| RPSA       | ENSG00000168028 | 0,54747837  | 0,048416432 | down | miR-181c |
| SRPRB      | ENSG00000144867 | 0,959784349 | 0,002954075 | down | miR-181c |
| SESN2      | ENSG00000130766 | 0,962803286 | 0,008928025 | down | miR-181c |
| NRAS       | ENSG00000213281 | 0,981420506 | 0,014752491 | down | miR-181c |
| NDUFC2     | ENSG00000151366 | 0,76573168  | 0,011703622 | down | miR-181c |
| ATAD1      | ENSG00000138138 | 0,78902149  | 0,016364792 | down | miR-181c |
| OSTC       | ENSG00000198856 | 1,696527052 | 4,59981E-05 | up   | miR-181c |
| TMTC3      | ENSG00000139324 | 0,80692316  | 0,022467133 | down | miR-181c |
| ARPC5      | ENSG00000162704 | 0,523810999 | 0,024904889 | down | miR-181c |
| PPP2R2C    | ENSG00000074211 | 3,173328458 | 0,003450038 | up   | miR-181c |
| ANO8       | ENSG00000074855 | 1,463941015 | 0,032910401 | up   | miR-181c |
| GOLPH3     | ENSG00000113384 | 1,473470913 | 0,001810712 | up   | miR-181c |
| OSCP1      | ENSG00000116885 | 1,759418242 | 0,023320979 | up   | miR-181c |
| RAB1A      | ENSG00000138069 | 0,874558075 | 0,015392894 | down | miR-181c |
| HACD3      | ENSG00000074696 | 0,82764358  | 0,003662778 | down | miR-181c |
| AJUBA      | ENSG00000129474 | 1,063676047 | 0,048937671 | up   | miR-181c |
| UBE211     | ENSG00000198833 | 0,760376097 | 0,004535213 | down | miR-181c |
| PCBD2      | ENSG00000132570 | 1,381194233 | 0,006396676 | up   | miR-181c |
| AL355488.1 | ENSG00000273373 | 2,641013685 | 2,46866E-05 | up   | miR-181c |

|            |                  |             |             |      |          |
|------------|------------------|-------------|-------------|------|----------|
| TINF2      | ENSG00000092330  | 1,319666569 | 0,004722751 | up   | miR-181c |
| TXNDC11    | ENSG00000153066  | 2,050116128 | 4,27834E-05 | up   | miR-181c |
| SHB        | ENSG00000107338  | 1,130657763 | 0,016715611 | up   | miR-181c |
| RPE        | ENSG00000197713  | 1,063651841 | 0,010769312 | up   | miR-181c |
| GAMT       | ENSG00000130005  | 2,207617734 | 0,00506754  | up   | miR-181c |
| NDFIP1     | ENSG00000131507  | 0,656482861 | 0,013329699 | down | miR-181c |
| ADO        | ENSG00000181915  | 1,628454138 | 0,000441174 | up   | miR-181c |
| ZNF768     | ENSG00000169957  | 0,929388515 | 0,02326451  | down | miR-181c |
| CBX4       | ENSG00000141582  | 0,920025547 | 0,005047114 | down | miR-181c |
| EDA2R      | ENSG00000131080  | 2,325697696 | 0,001664498 | up   | miR-181c |
| LNPEP      | ENSG00000113441  | 0,70282519  | 0,002819633 | down | miR-181c |
| KIAA1429   | ENSG00000164944  | 0,671813537 | 0,011800581 | down | miR-181c |
| ADNP       | ENSG00000101126  | 0,910974018 | 0,001475451 | down | miR-181c |
| DHX9       | ENSG00000135829  | 0,988246126 | 0,006707488 | down | miR-181c |
| CLYBL      | ENSG00000125246  | 1,591660154 | 0,034379595 | up   | miR-181c |
| FBXO18     | ENSG00000134452  | 0,679611732 | 0,016842718 | down | miR-181c |
| CFI        | ENSG00000205403  | 0,990766081 | 0,020004761 | down | miR-181c |
| MRPL34     | ENSG00000130312  | 3,073815687 | 0,000534828 | up   | miR-181c |
| PARL       | ENSG00000175193  | 0,782719532 | 0,009080289 | down | miR-181c |
| C4orf19    | ENSG00000154274  | 2,121703039 | 0,00354884  | up   | miR-181c |
| AFG3L2     | ENSG00000141385  | 1,059019427 | 0,001600875 | up   | miR-181c |
| ACLY       | ENSG00000131473  | 0,528717584 | 0,029826637 | down | miR-181c |
| TMEM109    | ENSG00000110108  | 0,974787747 | 0,001964439 | down | miR-181c |
| PLK2       | ENSG00000145632  | 1,017915238 | 0,016914319 | up   | miR-181c |
| ZNF598     | ENSG00000167962  | 0,729889086 | 0,039270164 | down | miR-181c |
| METTL2B    | ENSG00000165055  | 0,948787841 | 0,006116266 | down | miR-181c |
| TMEM140    | ENSG00000146859  | 1,147966125 | 0,020802065 | up   | miR-181c |
| PSMD13     | ENSG00000185627  | 0,859787612 | 0,00385757  | down | miR-181c |
| ETF1       | ENSG00000120705  | 0,638582022 | 0,0237397   | down | miR-181c |
| AC010503.4 | ENSG00000275234  | 1,645735274 | 0,013423401 | up   | miR-181c |
| BCL2       | ENSG00000171791  | 1,020729308 | 0,012914207 | up   | miR-181c |
| PPP2CB     | ENSG00000104695  | 0,67911617  | 0,024745159 | down | miR-181c |
| EPT1       | ENSG00000138018  | 1,195541798 | 0,004931779 | up   | miR-181c |
| FIBIN      | ENSG00000176971  | 1,651179778 | 0,001326116 | up   | miR-181c |
| IFNGR1     | ENSG00000027697  | 1,458078434 | 0,006014319 | up   | miR-181c |
| FAAH2      | ENSG00000165591  | 2,086137556 | 0,00858262  | up   | miR-181c |
| AGL        | ENSG00000162688  | 1,316883579 | 0,000963464 | up   | miR-181c |
| SNRPD1     | ENSG00000167088  | 0,587696941 | 0,029163814 | down | miR-181c |
| RABEP1     | ENSG00000029725  | 0,693360526 | 0,006359637 | down | miR-181c |
| GSK3B      | ENSG00000082701  | 0,49606785  | 0,034041915 | down | miR-181c |
| RPL17      | ENSG00000265681  | 1,305729029 | 0,036413273 | up   | miR-181c |
| SNRPD3     | ENSG00000100028  | 0,454341146 | 0,028635136 | down | miR-181c |
| GLT8D1     | ENSG00000016864  | 0,978800829 | 0,003295694 | down | miR-181c |
| VPS33B     | ENSG00000184056  | 1,256377044 | 0,046728585 | up   | miR-181c |
| PRPF19     | ENSG00000110107  | 0,478305678 | 0,044858268 | down | miR-181c |
| BAX        | ENSG00000087088  | 0,843536525 | 0,006161342 | down | miR-181c |
| CREG1      | ENSG00000143162  | 0,820450699 | 0,012145292 | down | miR-181c |
| LYPLA1     | ENSG00000120992  | 1,182384782 | 0,003478491 | up   | miR-181c |
| MRO        | ENSG00000134042  | 0,485385533 | 0,036846645 | down | miR-181c |
| NAA25      | ENSG00000111300  | 0,880768368 | 0,01489335  | down | miR-181c |
| TUSC1      | ENSG00000198680  | 1,360090728 | 0,034280498 | up   | miR-181c |
| HIST1H4E   | ENSG00000276966  | 2,57838533  | 0,044399456 | up   | miR-181c |
| LTN1       | ENSG00000198862  | 0,659688813 | 0,019243598 | down | miR-181c |
| OSBPL8     | ENSG00000091039  | 1,70277565  | 0,015381729 | up   | miR-181c |
| RRP1B      | ENSG00000160208  | 0,635328382 | 0,048207254 | down | miR-181c |
| ICE1       | ENSG00000164151  | 0,713087425 | 0,023333735 | down | miR-181c |
| LPGAT1     | ENSG00000123684  | 0,795283051 | 0,010917054 | down | miR-181c |
| AKR1B10    | ENSG00000198074  | 1,835752017 | 0,018288725 | up   | miR-181c |
| C18orf32   | ENSG00000177576  | 1,280766841 | 0,01380719  | up   | miR-181c |
| RPS7       | ENSG00000171863  | 0,854483576 | 0,034589716 | down | miR-181c |
| GNL2       | ENSG00000134697  | 1,00907688  | 0,031918064 | up   | miR-181c |
| NAT6       | ENSG00000243477  | 2,051652304 | 0,001029632 | up   | miR-181c |
| FBXW2      | ENSG00000119402  | 0,738326911 | 0,003616096 | down | miR-181c |
| CDKN2AIP   | ENSG00000168564  | 0,930450607 | 0,004110783 | down | miR-181c |
| LDLRAD3    | ENSG00000179241  | 1,158146116 | 0,014368757 | up   | miR-181c |
| RFNG       | ENSG00000169733  | 0,686942508 | 0,031247272 | down | miR-181c |
| ELAVL1     | ENSG000000066044 | 0,786577567 | 0,009965691 | down | miR-181c |
| NOL6       | ENSG00000165271  | 1,084696944 | 0,02569426  | up   | miR-181c |
| CAMSAP2    | ENSG00000118200  | 1,067630954 | 0,044255394 | up   | miR-181c |
| METTL13    | ENSG00000010165  | 1,481088364 | 0,005796174 | up   | miR-181c |
| RPS6KC1    | ENSG00000136643  | 1,649853199 | 0,000359257 | up   | miR-181c |
| TSTD1      | ENSG00000215845  | 0,947422476 | 0,001020247 | down | miR-181c |
| SPOPL      | ENSG00000144228  | 0,896104537 | 0,048247358 | down | miR-181c |
| TMEM9B     | ENSG00000175348  | 0,98595838  | 0,009491759 | down | miR-181c |
| INPP5E     | ENSG00000148384  | 1,382716264 | 0,046601864 | up   | miR-181c |
| AC106869.1 | ENSG00000234690  | 1,423763744 | 0,025066551 | up   | miR-181c |
| ZNF839     | ENSG00000022976  | 0,818664834 | 0,03688849  | down | miR-181c |

|              |                   |             |             |      |          |
|--------------|-------------------|-------------|-------------|------|----------|
| SLC30A9      | ENSG00000014824   | 0,821448813 | 0,006098096 | down | miR-181c |
| GSK3A        | ENSG000000105723  | 1,376598265 | 0,000281762 | up   | miR-181c |
| MRPL24       | ENSG000000143314  | 1,201479536 | 0,002580482 | up   | miR-181c |
| PCNP         | ENSG000000081154  | 0,648681744 | 0,008516944 | down | miR-181c |
| CHMP2A       | ENSG000000130724  | 0,604354258 | 0,029861508 | down | miR-181c |
| PSMB2        | ENSG000000126067  | 0,6298803   | 0,00220477  | down | miR-181c |
| RASSF8       | ENSG000000123094  | 0,757497776 | 0,003819053 | down | miR-181c |
| TMEM230      | ENSG000000089063  | 1,335292323 | 0,020343259 | up   | miR-181c |
| SIRPA        | ENSG000000198053  | 1,060563031 | 0,010301445 | up   | miR-181c |
| EPS15        | ENSG000000085832  | 0,667726483 | 0,007095458 | down | miR-181c |
| FZD5         | ENSG000000163251  | 1,55911023  | 0,006557651 | up   | miR-181c |
| MTF1         | ENSG000000188786  | 1,031479851 | 0,014005515 | up   | miR-181c |
| CSNK1G3      | ENSG000000151292  | 0,794967401 | 0,01599736  | down | miR-181c |
| KLHL9        | ENSG000000198642  | 1,028164494 | 0,01033395  | up   | miR-181c |
| PIKFYVE      | ENSG000000115020  | 0,618682531 | 0,014531387 | down | miR-181c |
| PUM2         | ENSG000000055917  | 0,784558833 | 0,007734495 | down | miR-181c |
| ACMSD        | ENSG000000153086  | 2,754294931 | 0,008454669 | up   | miR-181c |
| MBNL3        | ENSG000000076770  | 2,123028988 | 0,009518915 | up   | miR-181c |
| GNPTG        | ENSG000000090581  | 0,863182921 | 0,003436803 | down | miR-181c |
| RRP15        | ENSG000000067533  | 0,745152817 | 0,026875528 | down | miR-181c |
| ATMIN        | ENSG000000166454  | 0,699900616 | 0,041764849 | down | miR-181c |
| DENR         | ENSG000000139726  | 0,645190468 | 0,013035565 | down | miR-181c |
| WWC1         | ENSG000000113645  | 0,904936603 | 0,006634873 | down | miR-181c |
| PON1         | ENSG000000005421  | 4,25991881  | 0,016463118 | up   | miR-181c |
| DIABLO       | ENSG000000184047  | 1,238359607 | 0,003819991 | up   | miR-181c |
| URI1         | ENSG000000105176  | 0,757111973 | 0,01825245  | down | miR-181c |
| MRPL11       | ENSG000000174547  | 1,340829165 | 0,000504976 | up   | miR-181c |
| ASCC1        | ENSG000000138303  | 1,249804487 | 0,014549026 | up   | miR-181c |
| CKB          | ENSG000000166165  | 1,136884032 | 0,016379885 | up   | miR-181c |
| SNRNP27      | ENSG000000124380  | 2,195126156 | 0,000448564 | up   | miR-181c |
| TMA16        | ENSG000000198498  | 0,816121448 | 0,008748163 | down | miR-181c |
| KCNJ11       | ENSG000000187486  | 2,15328337  | 0,014434046 | up   | miR-181c |
| MED27        | ENSG000000160563  | 0,82763762  | 0,011928093 | down | miR-181c |
| MRPS18C      | ENSG000000163319  | 1,523374265 | 0,000136432 | up   | miR-181c |
| KLHL8        | ENSG000000145332  | 0,721883789 | 0,034388655 | down | miR-181c |
| CLSTN2       | ENSG000000158258  | 1,863322872 | 0,000362078 | up   | miR-181c |
| ANAPC11      | ENSG000000141552  | 1,157094931 | 0,016764512 | up   | miR-181c |
| RAD54B       | ENSG000000197275  | 1,17980347  | 0,008298324 | up   | miR-181c |
| LINC02027    | ENSG000000243694  | 1,140810996 | 0,011112111 | up   | miR-181c |
| USP1         | ENSG000000162607  | 1,119053712 | 0,000259297 | up   | miR-181c |
| TMEM59       | ENSG000000116209  | 0,838446191 | 0,000959525 | down | miR-181c |
| SH3YL1       | ENSG000000035115  | 1,003327322 | 0,001632616 | up   | miR-181c |
| BICD2        | ENSG000000185963  | 0,725166622 | 0,024117609 | down | miR-181c |
| KLHDC3       | ENSG000000124702  | 0,892455076 | 0,004871339 | down | miR-181c |
| HKDC1        | ENSG000000156510  | 1,398468692 | 0,008457857 | up   | miR-181c |
| EPN2         | ENSG000000072134  | 0,628532614 | 0,026399901 | down | miR-181c |
| XPO7         | ENSG000000130227  | 0,828963089 | 0,004903676 | down | miR-181c |
| ZDHHC7       | ENSG000000153786  | 1,075420971 | 0,003282486 | up   | miR-181c |
| ULK1         | ENSG000000177169  | 0,750253181 | 0,049958178 | down | miR-181c |
| CX3CR1       | ENSG000000168329  | 1,303259091 | 0,032545921 | up   | miR-181c |
| ATP5C1       | ENSG000000165629  | 0,912526421 | 0,028056434 | down | miR-181c |
| IGSF8        | ENSG000000162729  | 2,584644921 | 6,04912E-05 | up   | miR-181c |
| TIGD1        | ENSG000000221944  | 1,596512477 | 0,030538728 | up   | miR-181c |
| DSE          | ENSG000000111817  | 0,776221505 | 0,018921152 | down | miR-181c |
| ILF2         | ENSG000000143621  | 0,833395953 | 0,035563722 | down | miR-181c |
| CAPRIN1      | ENSG000000135387  | 0,657669553 | 0,011965143 | down | miR-181c |
| AIP          | ENSG000000110711  | 1,137202508 | 0,025452314 | up   | miR-181c |
| BMS1         | ENSG000000165733  | 1,725357216 | 0,000112929 | up   | miR-181c |
| COX14        | ENSG000000178449  | 0,891458329 | 0,031025656 | down | miR-181c |
| TMEM11       | ENSG000000178307  | 0,915999598 | 0,010296299 | down | miR-181c |
| RBBP8        | ENSG000000101773  | 0,718594962 | 0,017927593 | down | miR-181c |
| OTUD5        | ENSG000000068308  | 0,340254483 | 0,032214161 | down | miR-181c |
| MMP2         | ENSG000000087245  | 1,45889872  | 0,0209354   | up   | miR-181c |
| TOP2B        | ENSG000000077097  | 0,817557805 | 0,006390374 | down | miR-181c |
| LRRC58       | ENSG000000163428  | 0,736933617 | 0,008816901 | down | miR-181c |
| CLPTM1L      | ENSG000000049656  | 0,658922387 | 0,004039268 | down | miR-181c |
| EPB41L4A-AS1 | ENSG0000000224032 | 0,880323977 | 0,03712194  | down | miR-181c |
| E1F1AX       | ENSG000000173674  | 0,846535863 | 0,002251485 | down | miR-181c |
| HOOK1        | ENSG000000134709  | 1,119813546 | 0,01267395  | up   | miR-181c |
| FHOD1        | ENSG000000135723  | 1,450158748 | 0,004601641 | up   | miR-181c |
| CDK4         | ENSG000000135446  | 0,645018455 | 0,016174184 | down | miR-181c |
| TAF1         | ENSG000000147133  | 1,002994731 | 0,0051369   | up   | miR-181c |
| AC007541.1   | ENSG000000260329  | 1,749951095 | 0,009342662 | up   | miR-181c |
| TXNDC17      | ENSG000000129235  | 1,043926732 | 0,001892767 | up   | miR-181c |
| NUDC         | ENSG000000090273  | 1,04959518  | 0,000443882 | up   | miR-181c |
| SNRPC        | ENSG000000124562  | 0,476154125 | 0,046313441 | down | miR-181c |
| C19orf53     | ENSG000000104979  | 1,248947354 | 0,001929881 | up   | miR-181c |

|            |                  |             |             |      |          |
|------------|------------------|-------------|-------------|------|----------|
| LRRCA9     | ENSG00000137821  | 1,614962023 | 0,0069544   | up   | miR-181c |
| HOMER3     | ENSG000000051128 | 0,804595578 | 0,019942754 | down | miR-181c |
| MYDGF      | ENSG00000074842  | 0,730974501 | 0,027521025 | down | miR-181c |
| TMEM14B    | ENSG00000137210  | 1,99204885  | 0,000879297 | up   | miR-181c |
| USP3       | ENSG00000140455  | 0,735153516 | 0,01350979  | down | miR-181c |
| FAM172A    | ENSG00000113391  | 0,56039455  | 0,042547437 | down | miR-181c |
| MRPS21     | ENSG00000266472  | 0,974601554 | 0,006617802 | down | miR-181c |
| HNMT       | ENSG00000150540  | 1,120940105 | 0,008893781 | up   | miR-181c |
| PTGDR      | ENSG00000168229  | 1,547803354 | 0,019791501 | up   | miR-181c |
| EXOSC6     | ENSG00000223496  | 0,803674712 | 0,010729112 | down | miR-181c |
| PFKFB3     | ENSG00000170525  | 1,296723443 | 0,000834925 | up   | miR-181c |
| TSPAN12    | ENSG00000106025  | 1,483879363 | 0,018685314 | up   | miR-181c |
| AC018797.2 | ENSG00000246560  | 1,21584706  | 0,038680244 | up   | miR-181c |
| FASTKD2    | ENSG00000118246  | 0,920224024 | 0,042596711 | down | miR-181c |
| NT5C3B     | ENSG00000141698  | 1,095028063 | 0,019464702 | up   | miR-181c |
| POLR2G     | ENSG00000168002  | 0,83403239  | 0,008371832 | down | miR-181c |
| PHC2       | ENSG00000134686  | 0,925073522 | 0,005020636 | down | miR-181c |
| ZBTB10     | ENSG00000205189  | 1,042442966 | 0,011008071 | up   | miR-181c |
| NFX1       | ENSG00000086102  | 0,755816951 | 0,026260437 | down | miR-181c |
| NECAP2     | ENSG00000157191  | 1,35208594  | 0,005537784 | up   | miR-181c |
| LARP4      | ENSG00000161813  | 0,79435085  | 0,018557562 | down | miR-181c |
| FBXO7      | ENSG00000100225  | 0,945544583 | 0,008188791 | down | miR-181c |
| ACAA1      | ENSG00000060971  | 0,751586219 | 0,042201201 | down | miR-181c |
| CDH24      | ENSG00000139880  | 2,154707502 | 0,010327053 | up   | miR-181c |
| CWC22      | ENSG00000163510  | 0,793567961 | 0,003945489 | down | miR-181c |
| MAGOHB     | ENSG00000111196  | 0,976575234 | 0,025136952 | down | miR-181c |
| AHCTF1     | ENSG00000153207  | 0,655890443 | 0,047589947 | down | miR-181c |
| SLC22A17   | ENSG00000092096  | 1,850408584 | 0,002065417 | up   | miR-181c |
| UBE2B      | ENSG00000119048  | 0,801728955 | 0,008486589 | down | miR-181c |
| PPP1R8     | ENSG00000117751  | 0,680290962 | 0,038406801 | down | miR-181c |
| IDH1       | ENSG00000138413  | 0,704847606 | 0,023886116 | down | miR-181c |
| TOMM70A    | ENSG00000154174  | 0,825589339 | 0,010911693 | down | miR-181c |
| SEPHS1     | ENSG00000086475  | 0,754193017 | 0,014469953 | down | miR-181c |
| VDAC1      | ENSG00000213585  | 0,881727708 | 0,009713735 | down | miR-181c |
| UCHL5      | ENSG00000116750  | 0,690645422 | 0,032211507 | down | miR-181c |
| RAB2B      | ENSG00000129472  | 1,726003943 | 0,000158493 | up   | miR-181c |
| GAPVD1     | ENSG00000165219  | 1,226379749 | 0,000669459 | up   | miR-181c |
| PARP6      | ENSG00000137817  | 0,818550125 | 0,003153265 | down | miR-181c |
| STK24      | ENSG00000102572  | 1,003126492 | 0,004461142 | up   | miR-181c |
| RALGAPB    | ENSG00000170471  | 0,626550966 | 0,020746403 | down | miR-181c |
| GNE        | ENSG00000159921  | 1,496507272 | 0,016306374 | up   | miR-181c |
| ASCC2      | ENSG00000100325  | 1,035045112 | 0,006116869 | up   | miR-181c |
| CTDNEP1    | ENSG00000175826  | 0,609564415 | 0,021905337 | down | miR-181c |
| ZNF772     | ENSG00000197128  | 1,50212768  | 0,005867924 | up   | miR-181c |
| ARPP19     | ENSG00000128989  | 1,132871926 | 0,002252486 | up   | miR-181c |
| RANBP2     | ENSG00000153201  | 0,559933957 | 0,004000137 | down | miR-181c |
| TOR1AIP1   | ENSG00000143337  | 0,767086215 | 0,02742346  | down | miR-181c |
| STRBP      | ENSG00000165209  | 0,802277805 | 0,0494053   | down | miR-181c |
| TCTN2      | ENSG00000168778  | 1,517973771 | 0,008773882 | up   | miR-181c |
| ST14       | ENSG00000149418  | 0,713768707 | 0,028728654 | down | miR-181c |
| TTC38      | ENSG00000075234  | 0,861403828 | 0,021470399 | down | miR-181c |
| STK33      | ENSG00000130413  | 2,450424294 | 0,004529161 | up   | miR-181c |
| FAM8A1     | ENSG00000137414  | 1,215326965 | 0,002507775 | up   | miR-181c |
| YPEL5      | ENSG00000119801  | 0,999737714 | 0,000972471 | down | miR-181c |
| KIF16B     | ENSG00000089177  | 0,645930813 | 0,029850974 | down | miR-181c |
| MBD2       | ENSG00000134046  | 0,76154472  | 0,003701221 | down | miR-181c |
| MSRB3      | ENSG00000174099  | 1,70103013  | 0,000753006 | up   | miR-181c |
| PYGO2      | ENSG00000163348  | 1,6402251   | 1,55262E-05 | up   | miR-181c |
| HNF4A      | ENSG00000101076  | 2,348040544 | 0,000733927 | up   | miR-181c |
| UBE2Q1     | ENSG00000160714  | 0,684245325 | 0,006181952 | down | miR-181c |
| FNIP1      | ENSG00000217128  | 0,892432698 | 0,008007742 | down | miR-181c |
| MIB1       | ENSG00000101752  | 0,766006626 | 0,001004619 | down | miR-181c |
| ZFAS1      | ENSG00000177410  | 0,47229587  | 0,029009464 | down | miR-181c |
| CCSER2     | ENSG00000107771  | 0,745703178 | 0,01541347  | down | miR-181c |
| PIP4K2A    | ENSG00000150867  | 0,783456663 | 0,027715418 | down | miR-181c |
| EBLN3P     | ENSG00000281649  | 0,981134056 | 0,000461896 | down | miR-181c |
| RAB29      | ENSG00000117280  | 1,004920549 | 0,002865154 | up   | miR-181c |
| CNN3       | ENSG00000117519  | 2,060439847 | 6,25434E-05 | up   | miR-181c |
| CEP70      | ENSG00000114107  | 0,861283726 | 0,040573731 | down | miR-181c |
| WDR31      | ENSG00000148225  | 1,170856761 | 0,038300963 | up   | miR-181c |
| PAK4       | ENSG00000130669  | 0,657365944 | 0,014669425 | down | miR-181c |
| CFTR       | ENSG00000001626  | 1,360754609 | 0,035502567 | up   | miR-181c |
| ASF1A      | ENSG00000111875  | 0,802465141 | 0,031393201 | down | miR-181c |
| SNRPN      | ENSG00000128739  | 1,61300959  | 0,001862279 | up   | miR-181c |
| NDUFB8     | ENSG00000166136  | 0,732234407 | 0,016689383 | down | miR-181c |
| SFXN1      | ENSG00000164466  | 0,515594824 | 0,048024146 | down | miR-181c |
| ABI1       | ENSG00000136754  | 0,81616014  | 0,0168999   | down | miR-181c |

|            |                 |             |             |      |          |
|------------|-----------------|-------------|-------------|------|----------|
| ACTR1B     | ENSG00000115073 | 0,453836227 | 0,003397216 | down | miR-181c |
| AEN        | ENSG00000181026 | 1,374251073 | 0,000518756 | up   | miR-181c |
| DUSP22     | ENSG00000112679 | 0,866307146 | 0,002200995 | down | miR-181c |
| MRPL43     | ENSG00000055950 | 0,892355535 | 0,014630281 | down | miR-181c |
| IDH2       | ENSG00000182054 | 0,763841949 | 0,020598934 | down | miR-181c |
| ATP6V1E1   | ENSG00000131100 | 1,047834874 | 0,001014633 | up   | miR-181c |
| SLC37A4    | ENSG00000137700 | 1,117277538 | 0,012726585 | up   | miR-181c |
| SF3A1      | ENSG00000099995 | 0,602466812 | 0,031053437 | down | miR-181c |
| TMEM106C   | ENSG00000134291 | 1,052531136 | 0,010412875 | up   | miR-181c |
| RGN        | ENSG00000130988 | 2,012696952 | 0,030660077 | up   | miR-181c |
| ALKBH5     | ENSG00000091542 | 0,700029688 | 0,043473299 | down | miR-181c |
| BORCS7     | ENSG00000166275 | 1,099348435 | 0,013138438 | up   | miR-181c |
| ACP5       | ENSG00000102575 | 1,412063899 | 0,017922252 | up   | miR-181c |
| RAB8A      | ENSG00000167461 | 0,578660124 | 0,015286229 | down | miR-181c |
| TMEM62     | ENSG00000137842 | 1,59322925  | 0,001534675 | up   | miR-181c |
| TRADD      | ENSG00000102871 | 0,637931189 | 0,048750181 | down | miR-181c |
| VEZF1      | ENSG00000136451 | 0,692674956 | 0,008011486 | down | miR-181c |
| ESYT1      | ENSG00000139641 | 0,783829384 | 0,01914778  | down | miR-181c |
| FRG1       | ENSG00000109536 | 0,648415258 | 0,010608907 | down | miR-181c |
| TJP1       | ENSG00000104067 | 0,810822892 | 0,035348758 | down | miR-181c |
| IFFO1      | ENSG00000010295 | 1,095182586 | 0,003920833 | up   | miR-181c |
| LRRC42     | ENSG00000116212 | 2,060010144 | 0,000150181 | up   | miR-181c |
| SDCBP2-AS1 | ENSG00000234684 | 1,602406123 | 0,00350947  | up   | miR-181c |
| LRRC41     | ENSG00000132128 | 1,0977108   | 0,015190402 | up   | miR-181c |
| TEX2       | ENSG00000136478 | 0,843444728 | 0,036670734 | down | miR-181c |
| PLSCR1     | ENSG00000188313 | 1,314231357 | 0,002284515 | up   | miR-181c |
| HTRA2      | ENSG00000115317 | 1,251340727 | 0,002038029 | up   | miR-181c |
| FBXL5      | ENSG00000118564 | 0,652040045 | 0,005767755 | down | miR-181c |
| CDC42      | ENSG00000070831 | 1,181320611 | 0,000681978 | up   | miR-181c |
| COA6       | ENSG00000168275 | 1,743070629 | 0,012059945 | up   | miR-181c |
| COPS2      | ENSG00000166200 | 0,583435327 | 0,012236692 | down | miR-181c |
| AP3S1      | ENSG00000177879 | 0,786059245 | 0,038650354 | down | miR-181c |
| VT11B      | ENSG00000100568 | 0,723262644 | 0,027364431 | down | miR-181c |
| RCOR3      | ENSG00000117625 | 0,939818824 | 0,001676828 | down | miR-181c |
| EIF3H      | ENSG00000147677 | 0,808612491 | 0,002528339 | down | miR-181c |
| STARD7     | ENSG00000084090 | 0,642208117 | 0,03613028  | down | miR-181c |
| FAM98B     | ENSG00000171262 | 1,301247117 | 0,000875717 | up   | miR-181c |
| DGUOK      | ENSG00000114956 | 1,351647595 | 0,001288792 | up   | miR-181c |
| G3BP2      | ENSG00000138757 | 0,64590111  | 0,008609108 | down | miR-181c |
| FCGR3A     | ENSG00000203747 | 0,658995061 | 0,034159605 | down | miR-181c |
| ZNF280D    | ENSG00000137871 | 0,631420196 | 0,00773141  | down | miR-181c |
| TMEM248    | ENSG00000106609 | 0,700177461 | 0,037635578 | down | miR-181c |
| GBAS       | ENSG00000146729 | 0,890595856 | 0,027530748 | down | miR-181c |
| PIK3CA     | ENSG00000121879 | 0,30003865  | 0,039702114 | down | miR-181c |
| AAMP       | ENSG00000127837 | 0,868630532 | 0,012159337 | down | miR-181c |
| UBQLN1     | ENSG00000135018 | 1,174104286 | 9,67416E-05 | up   | miR-181c |
| IFT46      | ENSG00000118096 | 1,12804399  | 0,011072615 | up   | miR-181c |
| CENPC      | ENSG00000145241 | 0,778791093 | 0,023744223 | down | miR-181c |
| IER3IP1    | ENSG00000134049 | 1,394841037 | 0,001549178 | up   | miR-181c |
| TMEM245    | ENSG00000106771 | 0,427971824 | 0,013395647 | down | miR-181c |
| RNF181     | ENSG00000168894 | 0,830109428 | 0,009218751 | down | miR-181c |
| NOP10      | ENSG00000182117 | 1,291865675 | 0,02008773  | up   | miR-181c |
| FKBP3      | ENSG00000100442 | 0,572405652 | 0,013792409 | down | miR-181c |
| TPP2       | ENSG00000134900 | 0,725914569 | 0,000597105 | down | miR-181c |
| ATP11C     | ENSG00000101974 | 0,573063245 | 0,005881963 | down | miR-181c |
| SLC25A36   | ENSG00000114120 | 0,47654089  | 0,029718191 | down | miR-181c |
| CBR1       | ENSG00000159228 | 1,33474373  | 0,002131245 | up   | miR-181c |
| FH         | ENSG00000091483 | 1,513643765 | 0,002923517 | up   | miR-181c |
| KANK3      | ENSG00000186994 | 1,315000665 | 0,009504494 | up   | miR-181c |
| SNAP25     | ENSG00000132639 | 2,630025676 | 0,011592185 | up   | miR-181c |
| SMIM6      | ENSG00000259120 | 1,430528933 | 0,034195444 | up   | miR-181c |
| TRIM26     | ENSG00000234127 | 1,154532158 | 0,003241088 | up   | miR-181c |
| PSMB4      | ENSG00000159377 | 1,116788619 | 0,00476923  | up   | miR-181c |
| ATL3       | ENSG00000184743 | 0,768023333 | 0,021836281 | down | miR-181c |
| BUB3       | ENSG00000154473 | 1,331190663 | 0,000106834 | up   | miR-181c |
| NDUFAB1    | ENSG00000004779 | 0,880738298 | 0,002667513 | down | miR-181c |
| PSMF1      | ENSG00000125818 | 0,976049114 | 0,003714966 | down | miR-181c |
| C11orf68   | ENSG00000175573 | 0,342234128 | 0,016850458 | down | miR-181c |
| PLIN2      | ENSG00000147872 | 1,047744825 | 0,009106048 | up   | miR-181c |
| EBNA1BP2   | ENSG00000117395 | 0,960836079 | 0,006863005 | down | miR-181c |
| LAD1       | ENSG00000159166 | 1,318297206 | 0,003539023 | up   | miR-181c |
| CCDC43     | ENSG00000180329 | 0,605693578 | 0,029183786 | down | miR-181c |
| RABL2A     | ENSG00000144134 | 1,240027797 | 0,022573884 | up   | miR-181c |
| SLC35F6    | ENSG00000213699 | 1,081167887 | 0,000823176 | up   | miR-181c |
| TBC1D2B    | ENSG00000167202 | 0,750026059 | 0,014724522 | down | miR-181c |
| ASXL2      | ENSG00000143970 | 0,698227491 | 0,011024039 | down | miR-181c |
| MMP7       | ENSG00000137673 | 1,583824219 | 0,014078636 | up   | miR-181c |

|            |                 |             |             |      |          |
|------------|-----------------|-------------|-------------|------|----------|
| C5NK1D     | ENSG00000141551 | 0,565102235 | 0,033295793 | down | miR-181c |
| CLK1       | ENSG00000013441 | 1,222228737 | 0,000301173 | up   | miR-181c |
| VAPB       | ENSG00000124164 | 0,753586912 | 0,012696428 | down | miR-181c |
| SGPL1      | ENSG00000166224 | 0,545714139 | 0,024453163 | down | miR-181c |
| UPF1       | ENSG00000005007 | 1,111408204 | 0,00251538  | up   | miR-181c |
| SOS1       | ENSG00000115904 | 0,649147123 | 0,011718157 | down | miR-181c |
| ASPN       | ENSG00000106819 | 0,742331394 | 0,035066871 | down | miR-181c |
| ADI1       | ENSG00000182551 | 0,879472628 | 0,022366423 | down | miR-181c |
| ETFA       | ENSG00000140374 | 0,895120157 | 0,019833562 | down | miR-181c |
| RYK        | ENSG00000163785 | 0,625907154 | 0,007019859 | down | miR-181c |
| THAP11     | ENSG00000168286 | 1,464644877 | 0,010897298 | up   | miR-181c |
| CPPED1     | ENSG00000103381 | 1,427820775 | 0,0006914   | up   | miR-181c |
| MZT2A      | ENSG00000173272 | 0,718727685 | 0,033163202 | down | miR-181c |
| DNAJC13    | ENSG00000138246 | 0,938263753 | 0,010296376 | down | miR-181c |
| CCDC58     | ENSG00000160124 | 2,694300452 | 3,49834E-07 | up   | miR-181c |
| TEFM       | ENSG00000172171 | 1,654295996 | 0,002099501 | up   | miR-181c |
| TRPM7      | ENSG00000092439 | 1,423717132 | 0,006124118 | up   | miR-181c |
| ZNF770     | ENSG00000198146 | 0,624318052 | 0,007833197 | down | miR-181c |
| ZSWIM8     | ENSG00000214655 | 0,608849385 | 0,011650882 | down | miR-181c |
| PMFBP1     | ENSG00000118557 | 1,183278784 | 0,031072139 | up   | miR-181c |
| SECISBP2   | ENSG00000187742 | 0,875226202 | 0,006543175 | down | miR-181c |
| EMC4       | ENSG00000128463 | 1,615648559 | 0,000127137 | up   | miR-181c |
| DCAF8      | ENSG00000132716 | 1,0143908   | 0,014784681 | up   | miR-181c |
| EIF2A      | ENSG00000144895 | 0,358446265 | 0,047259493 | down | miR-181c |
| NT5C       | ENSG00000125458 | 1,514033988 | 0,001428201 | up   | miR-181c |
| PSMB9      | ENSG00000240065 | 0,799270923 | 0,022271307 | down | miR-181c |
| TMEM150A   | ENSG00000168890 | 1,290558135 | 0,044297099 | up   | miR-181c |
| FAM234A    | ENSG00000167930 | 0,782605139 | 0,001835252 | down | miR-181c |
| AGA        | ENSG00000038002 | 1,093324837 | 0,037681622 | up   | miR-181c |
| AQR        | ENSG00000021776 | 0,524739196 | 0,012519766 | down | miR-181c |
| ZBTB33     | ENSG00000177485 | 0,981917224 | 0,001718328 | down | miR-181c |
| MRPS15     | ENSG00000116898 | 0,89010976  | 0,009795633 | down | miR-181c |
| CPEB2      | ENSG00000137449 | 1,004212299 | 0,049210537 | up   | miR-181c |
| LYPLA2     | ENSG00000011009 | 0,587776206 | 0,027213682 | down | miR-181c |
| PPP1CB     | ENSG00000213639 | 0,632950318 | 0,023490177 | down | miR-181c |
| TRIA1      | ENSG00000170855 | 1,08271917  | 0,00968091  | up   | miR-181c |
| CASP8A2    | ENSG00000118412 | 0,637018125 | 0,036108524 | down | miR-181c |
| SEMA5B     | ENSG00000082684 | 2,230090939 | 0,001107105 | up   | miR-181c |
| FAM122B    | ENSG00000156504 | 0,921936608 | 0,024065165 | down | miR-181c |
| KIAA2018   | ENSG00000176542 | 0,974027672 | 0,003112329 | down | miR-181c |
| SRPR       | ENSG00000182934 | 0,437710753 | 0,032698575 | down | miR-181c |
| AMFR       | ENSG00000159461 | 0,88406511  | 0,023657073 | down | miR-181c |
| APPL1      | ENSG00000157500 | 0,832574142 | 0,011003059 | down | miR-181c |
| SYNJ2BP    | ENSG00000213463 | 0,661233112 | 0,007143692 | down | miR-181c |
| SEL1L3     | ENSG00000091490 | 0,909477706 | 0,002917603 | down | miR-181c |
| ASGR1      | ENSG00000141505 | 2,184532281 | 0,022533011 | up   | miR-181c |
| NAA50      | ENSG00000121579 | 0,770533616 | 0,023191176 | down | miR-181c |
| GNPDA1     | ENSG00000113552 | 0,986325942 | 0,018872304 | down | miR-181c |
| MRPL41     | ENSG00000182154 | 0,725293184 | 0,036193791 | down | miR-181c |
| PDE8A      | ENSG00000073417 | 0,872342457 | 0,025162626 | down | miR-181c |
| EIF3M      | ENSG00000149100 | 0,546231437 | 0,017550316 | down | miR-181c |
| PPP2R1A    | ENSG00000105568 | 0,795217224 | 0,010452746 | down | miR-181c |
| DDX19B     | ENSG00000157349 | 0,761154784 | 0,007021819 | down | miR-181c |
| TCTN1      | ENSG00000204852 | 1,428651987 | 0,00116305  | up   | miR-181c |
| NBR1       | ENSG00000188554 | 0,989209502 | 0,009728663 | down | miR-181c |
| ARMC1      | ENSG00000104442 | 0,687507234 | 0,012287839 | down | miR-181c |
| THOC7      | ENSG00000163634 | 0,821025097 | 0,007508858 | down | miR-181c |
| PNPLA7     | ENSG00000130653 | 1,081950973 | 0,047475306 | up   | miR-181c |
| ERP44      | ENSG00000023318 | 1,431476592 | 0,000274696 | up   | miR-181c |
| YES1       | ENSG00000176105 | 1,339518282 | 5,83301E-05 | up   | miR-181c |
| SLC12A6    | ENSG00000140199 | 0,741494767 | 0,033942895 | down | miR-181c |
| IRAK1      | ENSG00000184216 | 0,549062252 | 0,011748631 | down | miR-181c |
| PLEKH01    | ENSG00000023902 | 1,426974556 | 0,019923029 | up   | miR-181c |
| HDHD2      | ENSG00000167220 | 0,714763313 | 0,0381357   | down | miR-181c |
| EIF4EBP2   | ENSG00000148730 | 0,941124953 | 0,009204802 | down | miR-181c |
| PCNT       | ENSG00000160299 | 0,807128467 | 0,044958708 | down | miR-181c |
| APLF       | ENSG00000169621 | 1,102198152 | 0,012724046 | up   | miR-181c |
| COMMD4     | ENSG00000140365 | 1,376960281 | 0,003117421 | up   | miR-181c |
| GLDC       | ENSG00000178445 | 1,892366625 | 0,02615648  | up   | miR-181c |
| AC005899.6 | ENSG00000274341 | 2,025835217 | 0,029126887 | up   | miR-181c |
| AL512306.3 | ENSG00000240710 | 1,061667689 | 0,032408877 | up   | miR-181c |
| SMAD4      | ENSG00000141646 | 1,018797641 | 0,007453907 | up   | miR-181c |
| COX7B      | ENSG00000131174 | 1,495653053 | 0,002430076 | up   | miR-181c |
| MRPL3      | ENSG00000114686 | 1,176153926 | 0,009315568 | up   | miR-181c |
| TMEM44-AS1 | ENSG00000231770 | 1,875750318 | 0,011224437 | up   | miR-181c |
| NUCB2      | ENSG00000070081 | 1,284094964 | 0,008037567 | up   | miR-181c |
| AL356356.1 | ENSG00000237781 | 1,5633124   | 0,014466793 | up   | miR-181c |

|            |                  |             |             |      |          |
|------------|------------------|-------------|-------------|------|----------|
| KANSL3     | ENSG00000114982  | 1,360251679 | 0,005954405 | up   | miR-181c |
| MYRIP      | ENSG00000170011  | 1,459026159 | 0,017316576 | up   | miR-181c |
| TLR1       | ENSG00000174125  | 1,447282749 | 0,016799356 | up   | miR-181c |
| DCTPP1     | ENSG00000179958  | 1,597665017 | 0,000392891 | up   | miR-181c |
| KIAA1804   | ENSG00000143674  | 1,546558241 | 0,028911062 | up   | miR-181c |
| NDUFS1     | ENSG00000023228  | 0,677502298 | 0,026960182 | down | miR-181c |
| ERH        | ENSG00000100632  | 1,733504905 | 0,000189683 | up   | miR-181c |
| F7         | ENSG00000057593  | 4,592656496 | 0,027452041 | up   | miR-181c |
| PTEN       | ENSG00000171862  | 0,604020509 | 0,007519752 | down | miR-181c |
| ABHD5      | ENSG00000011198  | 1,747762076 | 0,003403081 | up   | miR-181c |
| PCYOX1L    | ENSG00000145882  | 2,144723536 | 0,001048608 | up   | miR-181c |
| TMEM107    | ENSG00000179029  | 1,085631068 | 0,019232888 | up   | miR-181c |
| MAL2       | ENSG00000147676  | 1,414925504 | 0,003153023 | up   | miR-181c |
| HMG1       | ENSG00000205581  | 1,370588814 | 0,008235136 | up   | miR-181c |
| GLO1       | ENSG00000124767  | 1,28824984  | 0,002277747 | up   | miR-181c |
| NDUFA1     | ENSG00000125356  | 0,688934211 | 0,012737508 | down | miR-181c |
| C11orf31   | ENSG00000211450  | 0,956488103 | 0,005263103 | down | miR-181c |
| IDH3G      | ENSG00000067829  | 0,702782723 | 0,024990789 | down | miR-181c |
| NPTN       | ENSG00000156642  | 0,789861782 | 0,013274004 | down | miR-181c |
| ERI2       | ENSG00000196678  | 1,603781626 | 0,0024221   | up   | miR-181c |
| CDYL2      | ENSG00000166446  | 1,208310381 | 0,011833611 | up   | miR-181c |
| TKFC       | ENSG00000149476  | 0,930396304 | 0,029890711 | down | miR-181c |
| DEGS1      | ENSG00000119529  | 1,101195299 | 0,002386462 | up   | miR-181c |
| MRPL55     | ENSG00000162910  | 0,814664559 | 0,005724855 | down | miR-181c |
| KCNJ5      | ENSG00000120457  | 1,110654285 | 0,030883875 | up   | miR-181c |
| SUCLG2     | ENSG00000172340  | 1,05932621  | 0,021022346 | up   | miR-181c |
| HINT2      | ENSG00000137133  | 0,703026611 | 0,037710656 | down | miR-181c |
| PBX1       | ENSG00000185630  | 0,913536195 | 0,048939336 | down | miR-181c |
| PNPLA2     | ENSG00000177666  | 0,825299131 | 0,019524423 | down | miR-181c |
| CEP104     | ENSG00000116198  | 0,603784938 | 0,02038594  | down | miR-181c |
| ARHGEF10L  | ENSG00000074964  | 0,579901046 | 0,036451636 | down | miR-181c |
| LBR        | ENSG00000143815  | 1,126133313 | 0,001863082 | up   | miR-181c |
| SPSB1      | ENSG00000171621  | 0,864936535 | 0,042661851 | down | miR-181c |
| SLC27A5    | ENSG00000083807  | 3,515041593 | 0,016275347 | up   | miR-181c |
| ZNF506     | ENSG00000081665  | 1,55566133  | 0,005298698 | up   | miR-181c |
| PER1       | ENSG00000179094  | 1,150875722 | 0,035451492 | up   | miR-181c |
| SMAD2      | ENSG00000175387  | 0,659114599 | 0,020922846 | down | miR-181c |
| PPM1B      | ENSG00000138032  | 1,083616789 | 0,000668042 | up   | miR-181c |
| CPSF6      | ENSG00000111605  | 0,994618174 | 0,00125541  | down | miR-181c |
| RPL26L1    | ENSG00000037241  | 1,250574403 | 0,007429438 | up   | miR-181c |
| ATG9A      | ENSG00000198925  | 0,449711211 | 0,041865783 | down | miR-181c |
| ZNF747     | ENSG00000169955  | 1,762532155 | 0,002222824 | up   | miR-181c |
| GAS2L1     | ENSG00000185340  | 1,43824448  | 0,002048884 | up   | miR-181c |
| C12orf10   | ENSG00000139637  | 0,748770596 | 0,004773242 | down | miR-181c |
| LAMTOR4    | ENSG00000188186  | 0,635317072 | 0,018177528 | down | miR-181c |
| AATF       | ENSG00000275700  | 0,627575508 | 0,02556782  | down | miR-181c |
| TVP23B     | ENSG00000171928  | 1,413044031 | 0,035622617 | up   | miR-181c |
| C17orf89   | ENSG00000224877  | 0,839054192 | 0,019598917 | down | miR-181c |
| SMC2       | ENSG00000136824  | 1,321659708 | 0,001006766 | up   | miR-181c |
| C14orf93   | ENSG00000100802  | 1,780808255 | 0,000756761 | up   | miR-181c |
| DPCD       | ENSG00000166171  | 1,338001966 | 0,008385368 | up   | miR-181c |
| LINC00116  | ENSG00000175701  | 1,525656111 | 0,018739955 | up   | miR-181c |
| EIF2AK1    | ENSG00000086232  | 0,533846934 | 0,00384373  | down | miR-181c |
| CAMSAP1    | ENSG00000130559  | 0,920672519 | 0,013919509 | down | miR-181c |
| RFTN1      | ENSG00000131378  | 0,750253039 | 0,014453374 | down | miR-181c |
| CCDC7      | ENSG00000216937  | 1,582994831 | 0,000402493 | up   | miR-181c |
| SLC25A5    | ENSG00000005022  | 1,241430934 | 0,003181435 | up   | miR-181c |
| CMPK1      | ENSG00000162368  | 1,068336084 | 0,005573103 | up   | miR-181c |
| ACBD5      | ENSG00000107897  | 0,830567897 | 0,014573627 | down | miR-181c |
| FAM210B    | ENSG00000124098  | 1,628902619 | 0,016315381 | up   | miR-181c |
| ZNF467     | ENSG00000181444  | 1,480641733 | 0,031165456 | up   | miR-181c |
| CBLN3      | ENSG00000139899  | 2,579650067 | 6,63693E-05 | up   | miR-181c |
| NDUFB5     | ENSG00000136521  | 0,995528041 | 0,022061242 | down | miR-181c |
| GNS        | ENSG00000135677  | 0,670881855 | 0,00774974  | down | miR-181c |
| RTFDC1     | ENSG00000022277  | 0,542130544 | 0,028161497 | down | miR-181c |
| LARP1B     | ENSG00000138709  | 0,549945347 | 0,028213607 | down | miR-181c |
| SYS1       | ENSG000000204070 | 0,919364036 | 0,002947475 | down | miR-181c |
| PCYOX1     | ENSG00000116005  | 0,929654896 | 0,013530607 | down | miR-181c |
| PPP2CA     | ENSG00000113575  | 0,730155011 | 0,023235516 | down | miR-181c |
| CD58       | ENSG00000116815  | 0,977266354 | 0,014608961 | down | miR-181c |
| ALG3       | ENSG00000214160  | 0,88406012  | 0,007887565 | down | miR-181c |
| ZNF232     | ENSG00000167840  | 1,517363989 | 0,018989713 | up   | miR-181c |
| SMAP1      | ENSG00000112305  | 0,897446441 | 0,026107975 | down | miR-181c |
| ZC3H6      | ENSG00000188177  | 0,514050147 | 0,034809075 | down | miR-181c |
| WSB2       | ENSG00000176871  | 1,182399093 | 0,003734402 | up   | miR-181c |
| QTRTD1     | ENSG00000151576  | 0,988223769 | 0,032522561 | down | miR-181c |
| BX322562.1 | ENSG00000273796  | 2,364750022 | 0,028107519 | up   | miR-181c |

|             |                 |             |             |      |          |
|-------------|-----------------|-------------|-------------|------|----------|
| ID11        | ENSG00000067064 | 1,372772371 | 0,019099049 | up   | miR-181c |
| RPN1        | ENSG00000163902 | 0,447759449 | 0,026537324 | down | miR-181c |
| SMAGP       | ENSG00000170545 | 0,815456066 | 0,026789637 | down | miR-181c |
| TEF         | ENSG00000167074 | 1,115761311 | 0,019647815 | up   | miR-181c |
| DEDD        | ENSG00000158796 | 0,851798436 | 0,022327544 | down | miR-181c |
| F12         | ENSG00000131187 | 1,706687426 | 0,024183915 | up   | miR-181c |
| ACAP1       | ENSG00000072818 | 0,867075604 | 0,049174182 | down | miR-181c |
| TXNDC16     | ENSG00000087301 | 1,565600651 | 0,014811212 | up   | miR-181c |
| POLDIP2     | ENSG00000004142 | 0,818579445 | 0,030401637 | down | miR-181c |
| ZYG11B      | ENSG00000162378 | 0,887993056 | 0,010070423 | down | miR-181c |
| TGFB11      | ENSG00000140682 | 1,068582943 | 0,040926364 | up   | miR-181c |
| GAR1        | ENSG00000109534 | 1,087794292 | 0,033581777 | up   | miR-181c |
| SLC35F3     | ENSG00000183780 | 2,196987922 | 0,021037635 | up   | miR-181c |
| RNASEH1     | ENSG00000171865 | 1,207742746 | 0,003066388 | up   | miR-181c |
| YIPF2       | ENSG00000130733 | 0,777327717 | 0,023356858 | down | miR-181c |
| ZNF22       | ENSG00000165512 | 1,304676929 | 0,000329813 | up   | miR-181c |
| FBXL13      | ENSG00000161040 | 1,514525298 | 0,004337617 | up   | miR-181c |
| NUP155      | ENSG00000113569 | 1,301233078 | 0,00059697  | up   | miR-181c |
| OCIAD2      | ENSG00000145247 | 1,697630799 | 0,000594182 | up   | miR-181c |
| DRG2        | ENSG00000108591 | 0,606801195 | 0,030215224 | down | miR-181c |
| WAC-AS1     | ENSG00000254635 | 1,218852179 | 0,000256557 | up   | miR-181c |
| CC17        | ENSG00000102970 | 1,609073465 | 0,004773321 | up   | miR-181c |
| TRAPPC6B    | ENSG00000239273 | 0,896239273 | 0,00316397  | down | miR-181c |
| RASEF       | ENSG00000165105 | 1,224087313 | 0,031507859 | up   | miR-181c |
| PPP2R2D     | ENSG00000175470 | 0,941275214 | 0,001269101 | down | miR-181c |
| AL161421.1  | ENSG00000275202 | 1,076217168 | 0,041959884 | up   | miR-181c |
| TIMM21      | ENSG00000265354 | 0,919758606 | 0,01110815  | down | miR-181c |
| SMURF1      | ENSG00000198742 | 0,681024887 | 0,002738429 | down | miR-181c |
| LAT2        | ENSG00000086730 | 1,005487743 | 0,028807788 | up   | miR-181c |
| ADIPOR2     | ENSG00000006831 | 0,662150455 | 0,033880571 | down | miR-181c |
| ZSCAN29     | ENSG00000140265 | 0,833330897 | 0,020814729 | down | miR-181c |
| PSMB5       | ENSG00000100804 | 0,826030935 | 0,007454013 | down | miR-181c |
| SWI5        | ENSG00000175854 | 1,55177001  | 0,001069327 | up   | miR-181c |
| ANO7        | ENSG00000146205 | 1,031366504 | 0,030179533 | up   | miR-181c |
| SMTN        | ENSG00000183963 | 0,725356661 | 0,020956245 | down | miR-181c |
| UXT         | ENSG00000126756 | 1,57515633  | 0,003861203 | up   | miR-181c |
| PDCD5       | ENSG00000105185 | 1,561882867 | 0,037867954 | up   | miR-181c |
| PKC2        | ENSG00000100889 | 2,665460198 | 0,006682858 | up   | miR-181c |
| ATP2C1      | ENSG00000017260 | 1,248955518 | 0,002982116 | up   | miR-181c |
| NPTX1       | ENSG00000171246 | 1,933975199 | 0,008659786 | up   | miR-181c |
| ATXN7L3B    | ENSG00000253719 | 0,489398942 | 0,013835155 | down | miR-181c |
| DEPDC7      | ENSG00000121690 | 1,993561318 | 0,009323398 | up   | miR-181c |
| SQRDL       | ENSG00000137767 | 1,042531382 | 0,005540688 | up   | miR-181c |
| AC005261.3  | ENSG00000268713 | 1,993102588 | 0,000859487 | up   | miR-181c |
| EIF4E3      | ENSG00000163412 | 1,716340047 | 0,007518523 | up   | miR-181c |
| ZNF641      | ENSG00000167528 | 1,021968843 | 0,005674559 | up   | miR-181c |
| GIMAP8      | ENSG00000171115 | 2,257786691 | 0,001088536 | up   | miR-181c |
| ADORA1      | ENSG00000163485 | 1,798679699 | 0,005804616 | up   | miR-181c |
| PGM3        | ENSG00000013375 | 0,798478432 | 0,006950748 | down | miR-181c |
| RNF126      | ENSG00000070423 | 1,005691073 | 0,001151438 | up   | miR-181c |
| NIPSNAP3A   | ENSG00000136783 | 0,93732015  | 0,0423282   | down | miR-181c |
| WDR26       | ENSG00000162923 | 1,108305664 | 0,004504575 | up   | miR-181c |
| ARF4        | ENSG00000168374 | 1,391754054 | 0,004196025 | up   | miR-181c |
| AAED1       | ENSG00000158122 | 2,838062731 | 0,009381635 | up   | miR-181c |
| ITPK1       | ENSG00000100605 | 0,74629326  | 0,034905695 | down | miR-181c |
| ALG10B      | ENSG00000175548 | 1,74891425  | 0,005798216 | up   | miR-181c |
| HTATSF1     | ENSG00000102241 | 1,111814068 | 0,000303847 | up   | miR-181c |
| UFL1        | ENSG00000014123 | 0,664658354 | 0,007922251 | down | miR-181c |
| HNRNPR      | ENSG00000125944 | 0,668271754 | 0,03505897  | down | miR-181c |
| MARCHF7     | ENSG00000136536 | 0,806144958 | 0,002324082 | down | miR-181c |
| GID8        | ENSG00000101193 | 0,637741019 | 0,037422974 | down | miR-181c |
| TSPOAP1-AS1 | ENSG00000265148 | 1,503235394 | 0,021110485 | up   | miR-181c |
| RNF7        | ENSG00000114125 | 0,6889077   | 0,027200859 | down | miR-181c |
| POMP        | ENSG00000132963 | 0,744177078 | 0,011004698 | down | miR-181c |
| GLOD4       | ENSG00000167699 | 1,311066832 | 0,007725472 | up   | miR-181c |
| ITGAX       | ENSG00000140678 | 1,080134216 | 0,009629772 | up   | miR-181c |
| SPPL2A      | ENSG00000138600 | 0,768890019 | 0,014515445 | down | miR-181c |
| ACADL       | ENSG00000115361 | 1,970492926 | 0,005043246 | up   | miR-181c |
| MRPL51      | ENSG00000111639 | 0,968809957 | 0,011250345 | down | miR-181c |
| REEP6       | ENSG00000115255 | 2,070049013 | 0,041776792 | up   | miR-181c |
| FMNL1       | ENSG00000184922 | 1,096123486 | 0,010727976 | up   | miR-181c |
| ZNF33A      | ENSG00000189180 | 0,786206768 | 0,005397431 | down | miR-181c |
| VMA21       | ENSG00000160131 | 0,994715879 | 0,011134593 | down | miR-181c |
| DRICH1      | ENSG00000189269 | 1,097208361 | 0,023541358 | up   | miR-181c |
| WARS        | ENSG00000140105 | 1,313587119 | 0,000673925 | up   | miR-181c |
| TLE1        | ENSG00000196781 | 0,913456842 | 0,017166901 | down | miR-181c |
| DNPH1       | ENSG00000112667 | 1,329981309 | 0,002117574 | up   | miR-181c |



|                 |                 |             |             |      |          |
|-----------------|-----------------|-------------|-------------|------|----------|
| NDRG3           | ENSG00000101079 | 1,723844843 | 0,000627929 | up   | miR-181c |
| DHRXS           | ENSG00000169084 | 1,0455349   | 0,039090345 | up   | miR-181c |
| NPM2            | ENSG00000158806 | 2,411699654 | 0,002860095 | up   | miR-181c |
| FRAT1           | ENSG00000165879 | 1,781227457 | 0,016699225 | up   | miR-181c |
| MSANTD4         | ENSG00000170903 | 1,040686472 | 0,019258188 | up   | miR-181c |
| FAM214B         | ENSG00000005238 | 1,476275234 | 0,014508104 | up   | miR-181c |
| THAP7-AS1       | ENSG00000230513 | 1,301226498 | 0,044570859 | up   | miR-181c |
| DNM1L           | ENSG00000087470 | 0,604266646 | 0,038898302 | down | miR-181c |
| PIN1            | ENSG00000127445 | 0,628981053 | 0,034961959 | down | miR-181c |
| METTL23         | ENSG00000181038 | 1,748129465 | 6,33873E-05 | up   | miR-181c |
| HIF1AN          | ENSG00000166135 | 0,845154153 | 0,007525747 | down | miR-181c |
| DNAJC22         | ENSG00000178401 | 1,920083623 | 0,024167122 | up   | miR-181c |
| MOB3A           | ENSG00000172081 | 1,101280709 | 0,008316568 | up   | miR-181c |
| FRMD3           | ENSG00000172159 | 1,893385585 | 0,009701825 | up   | miR-181c |
| IMPACT          | ENSG00000154059 | 0,747020993 | 0,038370055 | down | miR-181c |
| LINC01843       | ENSG00000251169 | 1,892063221 | 0,025615411 | up   | miR-181c |
| ZNF10           | ENSG00000256223 | 1,858822544 | 0,006369424 | up   | miR-181c |
| SYT13           | ENSG00000019505 | 1,333367631 | 0,042981928 | up   | miR-181c |
| RREB1           | ENSG00000124782 | 0,681056509 | 0,02073373  | down | miR-181c |
| FGFR4           | ENSG00000160867 | 1,748682667 | 0,014199526 | up   | miR-181c |
| PPP5D1          | ENSG00000230510 | 2,456052617 | 0,007361786 | up   | miR-181c |
| MOCS3           | ENSG00000124217 | 1,522817005 | 0,001979051 | up   | miR-181c |
| MAPK14          | ENSG00000112062 | 0,947579725 | 0,003972834 | down | miR-181c |
| PGK1            | ENSG00000102144 | 0,994153784 | 0,000477598 | down | miR-181c |
| COL10A1         | ENSG00000123500 | 1,075209086 | 0,04152243  | up   | miR-181c |
| SECTM1          | ENSG00000141574 | 1,368136218 | 0,013704294 | up   | miR-181c |
| LAMP5           | ENSG00000125869 | 2,208110058 | 0,006382333 | up   | miR-181c |
| F11R            | ENSG00000158769 | 0,770008351 | 0,011214488 | down | miR-181c |
| GPRIN1          | ENSG00000169258 | 1,409065612 | 0,020611249 | up   | miR-181c |
| RNF14           | ENSG00000013561 | 0,911133202 | 0,017772086 | down | miR-181c |
| AC091133.1      | ENSG00000230532 | 1,169260539 | 0,03704836  | up   | miR-181c |
| PDZK1IP1        | ENSG00000162366 | 1,223110301 | 0,020523021 | up   | miR-181c |
| LIMS1           | ENSG00000169756 | 0,552849654 | 0,04391907  | down | miR-181c |
| ZNF441          | ENSG00000197044 | 1,543484169 | 0,038238646 | up   | miR-181c |
| CPSF2           | ENSG00000165934 | 0,863231555 | 0,001150623 | down | miR-181c |
| TOR4A           | ENSG00000198113 | 0,774841512 | 0,036771147 | down | miR-181c |
| TMEM185B        | ENSG00000226479 | 2,115900525 | 0,006881724 | up   | miR-181c |
| MPND            | ENSG00000008382 | 1,094058986 | 0,004676256 | up   | miR-181c |
| ZNF699          | ENSG00000196110 | 1,836380503 | 0,006038984 | up   | miR-181c |
| TCP1            | ENSG00000120438 | 1,142016881 | 0,009492268 | up   | miR-181c |
| C12orf75        | ENSG00000235162 | 1,259267242 | 0,02167927  | up   | miR-181c |
| CNIH3           | ENSG00000143786 | 1,996595182 | 0,026933249 | up   | miR-181c |
| DTWD2           | ENSG00000169570 | 2,041317332 | 0,004676383 | up   | miR-181c |
| RNASEK-C17orf49 | ENSG00000161939 | 1,053739269 | 0,049203215 | up   | miR-181c |
| TPD52           | ENSG00000076554 | 1,194959759 | 0,022172189 | up   | miR-181c |
| LMBRD1          | ENSG00000168216 | 0,850477134 | 0,017390519 | down | miR-181c |
| CCT2            | ENSG00000166226 | 0,841752321 | 0,01204053  | down | miR-181c |
| C6orf141        | ENSG00000197261 | 2,231232031 | 0,01907603  | up   | miR-181c |
| ZNF805          | ENSG00000204524 | 1,55563451  | 0,004331079 | up   | miR-181c |
| ZNF2            | ENSG00000275111 | 1,587161415 | 0,020579514 | up   | miR-181c |
| AC009506.1      | ENSG00000224152 | 1,397205784 | 0,022292863 | up   | miR-181c |
| SRP9            | ENSG00000143742 | 1,777304798 | 0,000395359 | up   | miR-181c |
| BEND3           | ENSG00000178409 | 1,722524967 | 0,011323942 | up   | miR-181c |
| C1orf210        | ENSG00000253313 | 1,850864384 | 0,000133674 | up   | miR-181c |
| SLC25A47        | ENSG00000140107 | 4,43397697  | 0,029103596 | up   | miR-181c |
| AP004609.3      | ENSG00000278376 | 1,155826753 | 0,025941813 | up   | miR-181c |
| AC130324.1      | ENSG00000263531 | 2,186140224 | 0,000287002 | up   | miR-181c |
| SLC22A7         | ENSG00000137204 | 4,425221131 | 0,042408115 | up   | miR-181c |
| RDH12           | ENSG00000139988 | 0,950764921 | 0,03755817  | down | miR-181c |
| C14orf132       | ENSG00000227051 | 1,424719983 | 0,001244014 | up   | miR-181c |
| CCL20           | ENSG00000115009 | 2,218431533 | 0,034630243 | up   | miR-181c |
| UEVLD           | ENSG00000151116 | 2,113806533 | 0,003776456 | up   | miR-181c |
| UFSP1           | ENSG00000176125 | 1,439105536 | 0,010005854 | up   | miR-181c |
| SBF2-AS1        | ENSG00000246273 | 2,76536477  | 0,000493201 | up   | miR-181c |
| MOCS1           | ENSG00000124615 | 1,694958875 | 0,007504815 | up   | miR-181c |
| IPCEF1          | ENSG00000074706 | 2,015566022 | 0,002992128 | up   | miR-181c |
| S100A4          | ENSG00000196154 | 2,180073519 | 0,024960744 | up   | miR-181c |
| HIST1H2BN       | ENSG00000233822 | 1,16938642  | 0,012166876 | up   | miR-181c |
| PAN3-AS1        | ENSG00000261485 | 2,222135643 | 0,006435244 | up   | miR-181c |
| CRTAC1          | ENSG00000095713 | 1,792119959 | 0,005705327 | up   | miR-181c |
| PTGER1          | ENSG00000160951 | 1,353651762 | 0,012103108 | up   | miR-181c |
| LINC01123       | ENSG00000204588 | 1,564661523 | 0,043526372 | up   | miR-181c |
| COLEC10         | ENSG00000184374 | 1,190640841 | 0,046900559 | up   | miR-181c |
| PTHLH           | ENSG00000087494 | 1,971958057 | 0,032905231 | up   | miR-181c |
| NDNL2           | ENSG00000185115 | 1,531802307 | 0,040092891 | up   | miR-181c |
| CAMK1G          | ENSG00000008118 | 2,309571032 | 0,033045455 | up   | miR-181c |
| HRCT1           | ENSG00000196196 | 1,972189658 | 0,0040113   | up   | miR-181c |

|           |                 |             |             |    |          |
|-----------|-----------------|-------------|-------------|----|----------|
| ZNF776    | ENSG00000152443 | 1,900369154 | 0,006444469 | up | miR-181c |
| LRRRC73   | ENSG00000204052 | 1,519055769 | 0,033870796 | up | miR-181c |
| LINC01705 | ENSG00000232679 | 2,219789754 | 0,028211509 | up | miR-181c |
| TMEM17    | ENSG00000186889 | 1,952450112 | 0,028022468 | up | miR-181c |
