# Supplementary material for: A MiR181/Sirtuin1 regulatory circuit modulates drug response in biliary cancers
Source: Springer Nature journal article supplement (doi:10.1007/s10238-024-01332-0), 2024-04-10
Supplement: MOESM5 [file 26963182]

Table S3. Pearson's correlation of miR-181c and miR-181d and predicted target genes (filtered for gene expression's p-value < 0.05) in BTC patients

| GENE NAME | correlation<br>with miR-181c | pval        | correlation<br>with miR-181d | pval        |
|-----------|------------------------------|-------------|------------------------------|-------------|
| ENAH      | -0,902375451                 | 0,102620989 | 0,529073322                  | 0,152248135 |
| NPEPPS    | -0,41116716                  | 0,013206184 | 0,288276555                  | 0,026772668 |
| FBXO34    | -0,376840728                 | 5,82919E-13 | -0,071684643                 | 1,89418E-11 |
| CDYL      | -0,253014159                 | 1,40065E-10 | -0,021976241                 | 3,30994E-09 |
| TRIM2     | -0,250925441                 | 9,5328E-11  | -0,128052986                 | 2,34747E-09 |
| GREM1     | -0,244792563                 | 2,76296E-06 | 0,077361681                  | 1,72654E-05 |
| LPCAT1    | -0,239707166                 | 8,92519E-12 | -0,0100696                   | 2,56467E-10 |
| SIRT1     | -0,238139813                 | 1,81E-10    | -0,145712638                 | 2,79E-09    |
| GPD2      | -0,237632053                 | 5,40246E-13 | 0,066257621                  | 1,75506E-11 |
| TRAK1     | -0,234246098                 | 3,20344E-08 | 0,094902255                  | 4,30619E-07 |
| SRSF10    | -0,222888566                 | 4,66006E-07 | 0,032305467                  | 4,81777E-06 |
| RIMKLB    | -0,219207057                 | 2,12258E-12 | -0,021354076                 | 6,61967E-11 |
| VHL       | -0,217069477                 | 5,33331E-10 | 0,095317632                  | 1,18766E-08 |
| AAK1      | -0,213396677                 | 0,009720147 | -0,004175054                 | 0,02080578  |
| HLTF      | -0,207170734                 | 1,48235E-11 | 0,269153747                  | 4,31087E-10 |
| RLIM      | -0,205187254                 | 9,62239E-12 | 0,058312682                  | 2,85648E-10 |
| ATXN7     | -0,198900042                 | 0,006111119 | 0,30916583                   | 0,014822725 |
| DNAJC7    | -0,194620392                 | 0,004705671 | 0,056995322                  | 0,011986959 |
| ITGA3     | -0,193203556                 | 0,000308907 | 0,170948367                  | 0,001004231 |
| ZNF44     | -0,191589175                 | 3,70791E-12 | -0,076373555                 | 1,13942E-10 |
| VPS36     | -0,191413062                 | 8,43465E-10 | -0,173146967                 | 2,02684E-08 |
| ITGA6     | -0,187669584                 | 1,01319E-05 | 0,014688262                  | 5,91482E-05 |
| DHX57     | -0,187516227                 | 2,67806E-11 | 0,16973489                   | 7,38024E-10 |
| DDX60L    | -0,181421954                 | 4,93044E-09 | 0,01628315                   | 7,70715E-08 |
| NOTCH4    | -0,180538849                 | 2,85281E-12 | -0,177113241                 | 8,79274E-11 |
| HOXB4     | -0,172554522                 | 7,99053E-11 | 0,084215727                  | 1,73244E-09 |
| YWHAG     | -0,15521254                  | 0,000196212 | 0,241919621                  | 0,000843013 |
| ERAP2     | -0,154951032                 | 6,39885E-12 | -0,227945438                 | 1,86301E-10 |
| PGM2L1    | -0,150953937                 | 2,63281E-07 | -0,118979877                 | 2,80948E-06 |
| DENND4C   | -0,138811417                 | 6,09574E-11 | 0,039530405                  | 1,48585E-09 |
| ATM       | -0,137600413                 | 1,21293E-05 | 0,098927048                  | 7,46377E-05 |
| LATS1     | -0,136899376                 | 4,70117E-12 | -0,042327006                 | 1,38134E-10 |
| ADCY1     | -0,136493599                 | 2,33035E-14 | -0,16869463                  | 8,20986E-13 |
| C1orf52   | -0,13642592                  | 8,18299E-13 | 0,05514939                   | 2,6305E-11  |
| CCP110    | -0,135414073                 | 3,5711E-11  | 0,032257273                  | 9,12423E-10 |
| DNAL1     | -0,13331787                  | 2,50341E-12 | -0,086470753                 | 7,27528E-11 |
| MINK1     | -0,132301634                 | 3,56785E-11 | 0,278624482                  | 9,49548E-10 |
| DNAJA4    | -0,123380069                 | 2,07062E-11 | 0,10098077                   | 4,98868E-10 |
| PRKCD     | -0,122558631                 | 8,07656E-12 | -0,037547483                 | 2,17286E-10 |
| GNB4      | -0,119299422                 | 4,13644E-10 | -0,111156986                 | 9,61507E-09 |
| ZBTB43    | -0,116756991                 | 2,7588E-09  | -0,20220511                  | 5,03984E-08 |
| ZBTB41    | -0,11670869                  | 1,42818E-12 | -0,018544703                 | 4,53195E-11 |
| GOLGA8A   | -0,11555633                  | 1,60579E-09 | -0,317228485                 | 2,69905E-08 |
| MBOAT2    | -0,115172885                 | 1,5735E-12  | -0,117308876                 | 4,79697E-11 |
| ZDHHC3    | -0,114951839                 | 3,14337E-10 | 0,146107858                  | 6,93737E-09 |
| AFAP1     | -0,112475808                 | 1,52372E-11 | 0,004939498                  | 4,29166E-10 |
| ADGRF5    | -0,111194345                 | 8,61166E-13 | -0,044991387                 | 2,76859E-11 |
| CCDC88C   | -0,107276238                 | 5,84641E-12 | 0,054680042                  | 1,64754E-10 |
| MAP3K3    | -0,106965351                 | 2,25597E-08 | -0,090364201                 | 3,59772E-07 |
| RNF34     | -0,106752569                 | 1,29618E-11 | 0,066359031                  | 3,6875E-10  |
| ALG13     | -0,106469635                 | 2,04061E-12 | -0,231137573                 | 6,16526E-11 |
| TANC2     | -0,097795078                 | 6,31294E-11 | 0,178621356                  | 1,58084E-09 |
| NAPB      | -0,096115865                 | 7,03787E-13 | 0,157242362                  | 2,2769E-11  |
| ETNK1     | -0,090672059                 | 7,40132E-12 | 0,165083263                  | 2,14328E-10 |
| ESR1      | -0,089820417                 | 9,73317E-14 | -0,204541075                 | 3,07654E-12 |
| ITGA2     | -0,089561525                 | 2,21742E-09 | 0,02933415                   | 3,43569E-08 |
| TULP4     | -0,088972099                 | 1,94231E-10 | -0,044356506                 | 4,66045E-09 |
| B3GNT5    | -0,088853047                 | 3,65565E-12 | 0,026138341                  | 1,04376E-10 |
| BRD1      | -0,086477255                 | 9,56962E-12 | -0,003395233                 | 2,75599E-10 |
| ADAM28    | -0,079088505                 | 6,69737E-08 | -0,073405347                 | 7,17194E-07 |
| KIAA1217  | -0,078119901                 | 1,03316E-05 | -0,081950559                 | 6,41521E-05 |
| B3GALT5   | -0,077543178                 | 1,26395E-11 | -0,106823011                 | 3,21095E-10 |
| ADAMTS6   | -0,077303595                 | 2,20848E-13 | 0,072076699                  | 7,35723E-12 |
| RASSF1    | -0,076484802                 | 3,66358E-11 | 0,023665019                  | 9,9779E-10  |
| STXBP5    | -0,076304605                 | 5,93701E-11 | -0,163502217                 | 1,48223E-09 |
| MTMR9     | -0,073244933                 | 7,96079E-12 | -0,054942164                 | 2,23638E-10 |
| RNF145    | -0,073208781                 | 2,16212E-09 | 0,130395188                  | 4,23939E-08 |
| ACVR2A    | -0,070537592                 | 2,006E-12   | -0,113917129                 | 6,26109E-11 |

|         |              |             |              |             |
|---------|--------------|-------------|--------------|-------------|
| ZEB2    | -0,06887692  | 0,003288112 | -0,183060647 | 0,008089194 |
| ZFP62   | -0,068273284 | 7,69761E-13 | -0,156616148 | 2,46673E-11 |
| COL16A1 | -0,068161679 | 4,45317E-12 | -0,107662799 | 1,35477E-10 |
| ANKFY1  | -0,067318875 | 2,83545E-10 | -0,058365654 | 6,50544E-09 |
| PTPRE   | -0,066261886 | 4,17668E-10 | -0,153623381 | 9,40664E-09 |
| ZC3HAV1 | -0,065392647 | 1,46291E-07 | -0,195613006 | 1,76658E-06 |
| SLC24A3 | -0,063569323 | 3,96369E-13 | 0,046157993  | 1,30181E-11 |
| CHD7    | -0,06310379  | 1,00359E-05 | 0,047839548  | 6,83129E-05 |
| MORC3   | -0,060521237 | 7,33673E-10 | -0,021723387 | 1,66566E-08 |
| SLAIN2  | -0,060359778 | 2,72527E-10 | -0,186960506 | 6,49408E-09 |
| CNOT2   | -0,05888253  | 0,004279406 | -0,016840455 | 0,011306915 |
| CLASP1  | -0,058423995 | 3,07212E-11 | 0,095497216  | 8,17426E-10 |
| GNAQ    | -0,054904724 | 1,5543E-08  | 0,149734753  | 2,61939E-07 |
| LCOR    | -0,052699234 | 8,41439E-09 | 0,17190964   | 1,41326E-07 |
| ANKRD44 | -0,05166873  | 6,65276E-12 | -0,17237441  | 1,86859E-10 |
| CEP97   | -0,05126882  | 9,2619E-14  | 0,230205113  | 3,16839E-12 |
| CEP120  | -0,050659812 | 1,69297E-12 | 0,034436182  | 5,35263E-11 |
| CREB1   | -0,049164254 | 2,03773E-10 | 0,048456134  | 5,0331E-09  |
| ITGB8   | -0,045794628 | 1,19143E-10 | 0,025714019  | 2,70381E-09 |
| ZNF664  | -0,045233716 | 1,171E-11   | 0,162444718  | 3,22919E-10 |
| PAXBP1  | -0,044950006 | 5,42605E-10 | -0,197045364 | 1,28733E-08 |
| CDC5L   | -0,043738508 | 5,365E-08   | 0,127698449  | 7,76304E-07 |
| PLXNC1  | -0,041151986 | 9,51129E-11 | -0,085214739 | 2,19842E-09 |
| DCBLD2  | -0,041053056 | 5,37171E-11 | -0,051086805 | 1,26123E-09 |
| SOAT1   | -0,040995164 | 6,05869E-12 | 0,236682591  | 1,77553E-10 |
| CARD11  | -0,040336797 | 1,23301E-13 | 0,014269768  | 4,18623E-12 |
| PPIP5K2 | -0,038873954 | 1,19997E-09 | -0,044272684 | 2,42925E-08 |
| DOCK7   | -0,038849969 | 2,24171E-12 | 0,093567626  | 6,76352E-11 |
| TRNP1   | -0,038655058 | 3,04448E-12 | 0,129798307  | 9,04674E-11 |
| DIDO1   | -0,037312077 | 1,68442E-10 | 0,261389201  | 4,20671E-09 |
| SIPA1L2 | -0,033365359 | 5,69064E-12 | 0,100373925  | 1,72663E-10 |
| OSBPL3  | -0,032334865 | 1,92215E-09 | 0,123811533  | 3,54521E-08 |
| PHF2    | -0,032107943 | 1,454E-11   | -0,202650945 | 3,98654E-10 |
| AVL9    | -0,030567034 | 2,26549E-11 | -0,072264743 | 6,29054E-10 |
| MSI2    | -0,029604321 | 0,00061112  | -0,280749921 | 0,001968758 |
| PARP11  | -0,028591548 | 1,43646E-13 | -0,182893966 | 4,85582E-12 |
| JARID2  | -0,028262359 | 1,69079E-10 | 0,028712733  | 3,95364E-09 |
| CCNDBP1 | -0,027278491 | 4,81553E-12 | 0,153616771  | 1,417E-10   |
| FOXK1   | -0,0271167   | 2,0353E-11  | -0,070856261 | 5,70776E-10 |
| DGKH    | -0,02200577  | 1,2811E-07  | 0,088387468  | 1,41975E-06 |
| FAM135A | -0,02079908  | 2,62216E-11 | 0,054800544  | 7,20764E-10 |
| SPOCK1  | -0,019762123 | 5,82066E-12 | -0,146414554 | 1,51976E-10 |
| ZNF562  | -0,018801664 | 1,28179E-07 | -0,013333742 | 1,46613E-06 |
| ZNF217  | -0,018725732 | 2,18697E-10 | 0,243895529  | 5,2377E-09  |
| ATP8B2  | -0,018222455 | 9,07749E-13 | -0,220942326 | 2,90227E-11 |
| ARNT2   | -0,017145004 | 1,72366E-13 | 0,295749463  | 5,58451E-12 |
| INPP4A  | -0,015672451 | 1,73853E-12 | -0,026227541 | 5,2411E-11  |
| CRIM1   | -0,014080017 | 5,8253E-10  | -0,093872155 | 1,29212E-08 |
| PTPDC1  | -0,013750845 | 9,38254E-13 | -0,052951126 | 3,00052E-11 |
| FSD1L   | -0,011522749 | 4,3253E-14  | 0,164155887  | 1,50572E-12 |
| RAP1B   | -0,010848291 | 9,85958E-09 | -0,015754506 | 1,63859E-07 |
| PUM1    | -0,010608278 | 0,000926414 | 0,020665864  | 0,00308103  |
| PURB    | -0,010240462 | 4,88105E-10 | -0,060204051 | 1,16182E-08 |
| SESN3   | -0,009043938 | 1,23428E-10 | -0,043925627 | 3,02075E-09 |
| ENTPD6  | -0,008721831 | 1,29081E-09 | 0,036404186  | 2,34269E-08 |
| ENDOD1  | -0,007420766 | 3,21471E-11 | -0,161774132 | 8,25471E-10 |
| PTPN4   | -0,007359671 | 6,97616E-12 | 0,397605665  | 1,9555E-10  |
| ACER3   | -0,006694565 | 3,74502E-11 | 0,120519922  | 9,25017E-10 |
| TMEM87B | -0,005778603 | 1,74808E-10 | 0,057063781  | 4,34173E-09 |
| DMXL2   | -0,004187488 | 3,05875E-10 | 0,067335952  | 7,19805E-09 |
| KRAS    | -0,004057157 | 8,10258E-10 | 0,137989092  | 1,65958E-08 |
| ERO1A   | -0,002758805 | 7,09663E-08 | 0,141107972  | 8,87379E-07 |
| PSPC1   | -0,000447645 | 6,01413E-12 | 0,010127266  | 1,81613E-10 |
| ARHGEF7 | -6,68113E-05 | 1,40516E-11 | 0,024663052  | 3,99396E-10 |
| KIF3B   | 0,001123362  | 1,82518E-09 | -0,112816294 | 3,72956E-08 |
| XRN1    | 0,001143671  | 3,24321E-05 | -0,215456277 | 0,000181581 |
| TTF1    | 0,002964626  | 2,25846E-10 | 0,237086429  | 5,37825E-09 |
| MAEA    | 0,00323114   | 1,06996E-11 | 0,047088124  | 3,18289E-10 |
| UBP1    | 0,004856496  | 3,11659E-09 | 0,276189763  | 6,00179E-08 |
| PDCD4   | 0,00504728   | 1,56845E-05 | -0,124554849 | 9,77117E-05 |
| TGFB1   | 0,007630484  | 5,71333E-05 | -0,010859022 | 0,000266047 |
| CD46    | 0,013577103  | 0,004395407 | 0,437615408  | 0,011256843 |
| GRK6    | 0,014424409  | 7,90019E-13 | -0,044128138 | 2,55147E-11 |
| GPR88   | 0,016513395  | 9,62884E-15 | -0,159590335 | 3,45867E-13 |
| DIP2C   | 0,017365231  | 3,71795E-09 | -0,138734249 | 6,69262E-08 |
| CUL5    | 0,022636141  | 9,97428E-09 | -0,082745657 | 1,76994E-07 |
| C2CD5   | 0,022937337  | 2,40961E-13 | 0,256605544  | 8,02613E-12 |

|           |             |             |              |             |
|-----------|-------------|-------------|--------------|-------------|
| ANKRD52   | 0,024578892 | 2,44832E-11 | 0,303372901  | 6,58843E-10 |
| INO80D    | 0,024749056 | 8,85795E-11 | 0,004109303  | 2,43278E-09 |
| GFPT1     | 0,025295028 | 5,78198E-08 | -0,017972142 | 7,80167E-07 |
| KIF1B     | 0,027239222 | 1,14059E-08 | 0,249898677  | 1,95729E-07 |
| CDS1      | 0,028042833 | 2,42714E-12 | 0,077305047  | 7,29718E-11 |
| CHMP2B    | 0,028858752 | 4,74776E-10 | -0,025242717 | 1,09753E-08 |
| USP33     | 0,030332202 | 1,72907E-06 | 0,025107898  | 1,5609E-05  |
| PAM       | 0,030932879 | 1,75272E-10 | 0,062700285  | 4,33558E-09 |
| ATXN1     | 0,032940592 | 4,50716E-07 | 0,224765409  | 4,96059E-06 |
| PPFIA1    | 0,03502691  | 0,000488202 | -0,160974646 | 0,001803139 |
| MAP1A     | 0,035033429 | 1,23062E-09 | -0,096078073 | 2,31045E-08 |
| IFT57     | 0,038664702 | 1,83517E-12 | 0,074933329  | 5,77398E-11 |
| ADRA1A    | 0,040440856 | 1,13046E-14 | -0,161442504 | 4,04683E-13 |
| SRGAP1    | 0,047884536 | 7,23444E-05 | 0,024339122  | 0,000362646 |
| ZDHHC17   | 0,047998135 | 5,29007E-12 | 0,058650092  | 1,59768E-10 |
| MFAP3L    | 0,052017403 | 1,62622E-14 | 0,017901487  | 5,78051E-13 |
| CREBZF    | 0,052264083 | 7,68495E-10 | 0,167710828  | 1,74658E-08 |
| ZNF83     | 0,053418643 | 1,04602E-10 | 0,381052181  | 2,65832E-09 |
| RBBP7     | 0,053550546 | 3,06218E-09 | 0,252856833  | 5,74681E-08 |
| RIN2      | 0,053650163 | 6,42058E-12 | 0,181019027  | 1,93346E-10 |
| CRYBG3    | 0,055259875 | 1,21487E-09 | -0,061276198 | 2,4469E-08  |
| MAPK1IP1L | 0,056191547 | 2,40006E-10 | 0,052845474  | 6,26416E-09 |
| RANGAP1   | 0,057215804 | 1,13401E-06 | 0,124078838  | 9,8714E-06  |
| CD2AP     | 0,061084167 | 1,17963E-05 | 0,077911576  | 7,71186E-05 |
| ATP2B2    | 0,061973162 | 3,4269E-14  | 0,027008817  | 1,15331E-12 |
| CLOCK     | 0,062632461 | 6,52939E-11 | -0,003969672 | 1,7487E-09  |
| SLC25A24  | 0,062683206 | 5,81841E-13 | -0,084463819 | 1,89102E-11 |
| CEP83     | 0,064113382 | 4,99087E-12 | 0,248786853  | 1,46672E-10 |
| NPAT      | 0,06593453  | 2,88763E-12 | -0,017186695 | 8,95094E-11 |
| GLIS3     | 0,068718399 | 2,34093E-10 | 0,144512857  | 5,74742E-09 |
| ZNF544    | 0,071180731 | 1,5057E-12  | 0,230702914  | 4,58182E-11 |
| C12orf49  | 0,071687563 | 5,70504E-12 | 0,094424668  | 1,72276E-10 |
| LMBRD2    | 0,072631227 | 1,28054E-11 | 0,221132356  | 3,7647E-10  |
| EPC2      | 0,074989323 | 1,06476E-11 | 0,190495525  | 3,04156E-10 |
| IPO7      | 0,075789019 | 9,06635E-08 | 0,213297938  | 1,26293E-06 |
| SPAG1     | 0,077292648 | 6,95469E-13 | 0,118011522  | 2,24201E-11 |
| ZNF121    | 0,07861016  | 9,31701E-10 | 0,252087177  | 1,83918E-08 |
| ACAP2     | 0,078775096 | 3,08396E-09 | 0,218279186  | 6,16404E-08 |
| RAI1      | 0,079356771 | 6,42158E-12 | 0,032643157  | 1,86643E-10 |
| ANKRD50   | 0,079644204 | 5,98609E-12 | 0,205007942  | 1,80194E-10 |
| FMNL2     | 0,080687993 | 1,44375E-08 | 0,053725526  | 2,27105E-07 |
| JADE2     | 0,081056243 | 3,07576E-11 | 0,033006099  | 8,15016E-10 |
| SEPT8     | 0,081176677 | 4,65231E-11 | -0,023748087 | 1,14464E-09 |
| NR2C2     | 0,081180431 | 1,13246E-12 | 0,375194505  | 3,60936E-11 |
| SORD      | 0,081929838 | 1,10662E-14 | 0,061570608  | 3,96428E-13 |
| STIM2     | 0,082344573 | 6,54939E-10 | -0,002148957 | 1,4945E-08  |
| PDPK1     | 0,083008042 | 1,72146E-09 | 0,024935455  | 3,85598E-08 |
| ARFGEF3   | 0,083045411 | 7,28046E-12 | 0,266480705  | 2,01818E-10 |
| CCDC6     | 0,08347487  | 5,81549E-10 | 0,046599859  | 1,24992E-08 |
| FRYL      | 0,085046053 | 9,95074E-09 | 0,035137208  | 1,76178E-07 |
| BCL9      | 0,085694475 | 2,80695E-13 | 0,291927749  | 9,28637E-12 |
| TET2      | 0,087842337 | 1,81359E-09 | 0,048017516  | 4,05897E-08 |
| PAN3      | 0,08947334  | 5,82994E-12 | 0,064346061  | 1,64428E-10 |
| KIF3A     | 0,089541913 | 3,8564E-11  | 0,344395849  | 1,09101E-09 |
| GPX8      | 0,089679091 | 8,62467E-12 | 0,106523946  | 2,4745E-10  |
| ARL2BP    | 0,092608531 | 2,77734E-12 | 0,002680412  | 8,63164E-11 |
| GSE1      | 0,093065587 | 2,24345E-06 | 0,089787302  | 1,82965E-05 |
| TGFBR1    | 0,093316307 | 8,09293E-12 | 0,226343648  | 2,34598E-10 |
| DIP2B     | 0,094996057 | 2,17215E-11 | 0,142524327  | 5,67337E-10 |
| RAB3GAP1  | 0,09543642  | 1,05689E-08 | 0,117938765  | 1,86505E-07 |
| FAM122B   | 0,097185075 | 3,92669E-12 | 0,316515294  | 1,11771E-10 |
| G2E3      | 0,100020395 | 1,16217E-12 | 0,054531545  | 3,70523E-11 |
| LRBA      | 0,103050709 | 3,41354E-08 | -0,153912733 | 4,86704E-07 |
| KLF15     | 0,103869501 | 2,6853E-14  | -0,148264737 | 9,43327E-13 |
| WDR82     | 0,108330005 | 1,00812E-09 | 0,146359625  | 2,25655E-08 |
| PDCD6IP   | 0,110091086 | 1,14822E-09 | 0,109032073  | 2,46634E-08 |
| TNFK      | 0,1125394   | 2,92471E-09 | -0,105178016 | 4,81475E-08 |
| MTF2      | 0,113838254 | 3,68617E-10 | 0,122130538  | 8,86465E-09 |
| C2orf69   | 0,115406165 | 1,06275E-12 | 0,010139855  | 3,40444E-11 |
| VPS41     | 0,115998581 | 6,57367E-07 | -0,02972013  | 6,28899E-06 |
| MCC       | 0,116159187 | 4,11934E-14 | -0,136597437 | 1,43273E-12 |
| AGFG1     | 0,116321323 | 1,09743E-06 | 0,172119906  | 1,01992E-05 |
| NFAT5     | 0,116573298 | 0,000143056 | -0,036131303 | 0,000646328 |
| MEF2A     | 0,117153544 | 3,91321E-08 | -0,288777966 | 5,55128E-07 |
| AP1S3     | 0,117190039 | 2,687E-11   | 0,064776004  | 6,66945E-10 |
| VPS13B    | 0,118771648 | 1,75832E-11 | -0,093101318 | 4,95294E-10 |
| ATXN3     | 0,120422228 | 1,33842E-07 | -0,070305118 | 1,78002E-06 |

|           |             |             |              |             |
|-----------|-------------|-------------|--------------|-------------|
| CD302     | 0,120487952 | 1,8256E-13  | -0,093930653 | 6,14072E-12 |
| SRGAP2    | 0,121503691 | 1,53628E-13 | 0,045550589  | 5,19374E-12 |
| OSBP18    | 0,121945991 | 3,67851E-06 | 0,008558541  | 2,73548E-05 |
| IGF2BP2   | 0,122000943 | 4,03129E-06 | 0,082858736  | 2,79837E-05 |
| REST      | 0,122061685 | 0,000189683 | 0,142261593  | 0,000840444 |
| ETV6      | 0,122230868 | 0,00020551  | -0,029715284 | 0,000880483 |
| NAALADL2  | 0,123282432 | 4,67881E-12 | 0,114450698  | 1,36491E-10 |
| AKT3      | 0,125515401 | 2,78972E-10 | 0,071228395  | 6,76159E-09 |
| PTBP3     | 0,127641995 | 0,001060549 | 0,320084671  | 0,003493384 |
| SPIRE1    | 0,127731027 | 8,79375E-12 | 0,309445635  | 2,61405E-10 |
| CDKL5     | 0,127917395 | 9,25315E-13 | 0,077719876  | 2,77378E-11 |
| LUZP1     | 0,128407869 | 8,21561E-09 | -0,011891556 | 1,56245E-07 |
| PIAS1     | 0,130348361 | 7,21781E-09 | 0,107412733  | 1,33739E-07 |
| OSBP12    | 0,13045603  | 6,49488E-10 | 0,050452526  | 1,38391E-08 |
| IPO8      | 0,130617885 | 1,39717E-11 | 0,228500168  | 3,97764E-10 |
| GPATCH2L  | 0,132260888 | 7,49051E-08 | 0,119240733  | 9,9761E-07  |
| CCNK      | 0,134733075 | 4,54782E-12 | -0,030713064 | 1,25323E-10 |
| NAA15     | 0,135590781 | 3,89932E-10 | 0,104753708  | 8,55672E-09 |
| CAPRN1    | 0,137060475 | 5,42091E-09 | 0,083622504  | 1,05013E-07 |
| USP46     | 0,137286049 | 4,96034E-13 | 0,063144647  | 1,56741E-11 |
| F2R       | 0,138200438 | 1,30046E-11 | -0,012130656 | 3,78719E-10 |
| RNF169    | 0,139740353 | 1,34896E-11 | 0,047522326  | 3,94093E-10 |
| PRDX3     | 0,139833487 | 8,91344E-14 | 0,216601129  | 3,05122E-12 |
| RALA      | 0,140316137 | 2,18471E-07 | 0,167866791  | 2,34816E-06 |
| CAND1     | 0,143327593 | 2,77411E-08 | 0,297082322  | 4,13453E-07 |
| GIGYF1    | 0,144329452 | 8,19835E-06 | 0,199439022  | 5,65151E-05 |
| STRN      | 0,144860084 | 4,73281E-12 | 0,016705089  | 1,38975E-10 |
| HIPK1     | 0,144938436 | 1,47352E-09 | 0,205445425  | 3,12865E-08 |
| RALGAPB   | 0,14515674  | 8,5899E-12  | 0,245363821  | 2,4862E-10  |
| PLEKHJ1   | 0,145774219 | 5,79752E-11 | 0,099797782  | 1,55553E-09 |
| AFTPH     | 0,145855483 | 3,19103E-09 | 0,175284266  | 5,81241E-08 |
| CTDSPL    | 0,147270094 | 1,03828E-08 | 0,167597401  | 1,60916E-07 |
| NOTCH2    | 0,14834694  | 3,3541E-12  | 0,003948018  | 1,03392E-10 |
| PEAK1     | 0,148979091 | 1,27938E-08 | -0,21793481  | 2,10285E-07 |
| LTBP2     | 0,149515304 | 1,47493E-05 | -0,088054643 | 8,11408E-05 |
| PDE5A     | 0,152269062 | 5,48603E-12 | -0,06851962  | 1,63818E-10 |
| RLF       | 0,153380126 | 2,6677E-11  | 0,222755803  | 7,1634E-10  |
| ARL5A     | 0,154477817 | 5,5133E-07  | 0,462764182  | 5,4787E-06  |
| TMEM131   | 0,15464481  | 8,5993E-12  | -0,021768381 | 2,48631E-10 |
| SIN3B     | 0,155599159 | 1,39877E-10 | -0,02835201  | 3,40089E-09 |
| NACC2     | 0,15781234  | 9,13281E-13 | 0,220476278  | 2,93669E-11 |
| NAB1      | 0,158716642 | 2,64155E-08 | 0,42007927   | 3,82277E-07 |
| GOLGA8B   | 0,158795289 | 1,45365E-06 | 0,150445279  | 1,17535E-05 |
| EIF2AK1   | 0,161600079 | 4,25211E-08 | 0,276301278  | 6,1874E-07  |
| PPP2R3A   | 0,161620087 | 4,10367E-13 | 0,033178901  | 1,34661E-11 |
| TNS1      | 0,163547906 | 0,000998226 | 0,229189313  | 0,003110407 |
| PIK3C2A   | 0,163557008 | 0,003569108 | -0,026964405 | 0,009286277 |
| CBLB      | 0,164204242 | 2,82754E-08 | 0,040915636  | 3,96079E-07 |
| SSB       | 0,166976929 | 3,14138E-05 | 0,161510037  | 0,000176525 |
| IFT81     | 0,167494185 | 1,91165E-13 | 0,227449868  | 6,4118E-12  |
| DSE       | 0,1704541   | 1,53112E-10 | -0,017273624 | 3,94967E-09 |
| PPP1R12B  | 0,17485683  | 1,25727E-07 | -0,095465375 | 1,47894E-06 |
| MYO1E     | 0,175777479 | 1,94439E-07 | -0,113840113 | 2,24125E-06 |
| TIA1      | 0,179721212 | 9,56334E-07 | 0,076118075  | 8,69105E-06 |
| RNMT      | 0,182209285 | 4,61782E-09 | 0,259325955  | 9,03181E-08 |
| KLF7      | 0,18313364  | 9,25085E-11 | 0,020388397  | 2,28878E-09 |
| ARF3      | 0,185592656 | 0,001033631 | -0,178705203 | 0,003406312 |
| MGA       | 0,191440984 | 1,67318E-09 | 0,229777985  | 3,63657E-08 |
| SLC35E1   | 0,192035032 | 1,034E-07   | 0,040864057  | 1,35334E-06 |
| CAMTA2    | 0,193780505 | 2,00432E-12 | 0,181350989  | 6,28989E-11 |
| CREBRF    | 0,195888914 | 0,005854148 | 0,108753476  | 0,013811281 |
| AFF1      | 0,197330923 | 9,92337E-10 | -0,114016581 | 2,086E-08   |
| BIRC6     | 0,198799399 | 7,96847E-07 | 0,09011727   | 8,72508E-06 |
| GTSE1     | 0,198924228 | 7,79107E-14 | 0,268070084  | 2,66835E-12 |
| CPSF6     | 0,202579292 | 1,16278E-10 | 0,208623578  | 2,58198E-09 |
| CDC42BPA  | 0,202834468 | 1,16431E-05 | -0,187989446 | 6,95134E-05 |
| FAM13B    | 0,203656942 | 1,22949E-12 | 0,311407343  | 3,92273E-11 |
| POU2F1    | 0,209160055 | 1,04907E-09 | 0,269009466  | 2,35631E-08 |
| CTTNBP2NL | 0,211969226 | 2,69721E-09 | -0,125162277 | 5,089E-08   |
| KATNBL1   | 0,212396094 | 3,94866E-10 | 0,105344181  | 8,97078E-09 |
| TMEM165   | 0,21308056  | 1,92734E-06 | 0,072045034  | 1,62802E-05 |
| KPNA4     | 0,213480511 | 0,000348716 | 0,096689034  | 0,001356135 |
| SNX5      | 0,21415333  | 1,58808E-06 | 0,428061718  | 1,35675E-05 |
| LEMD3     | 0,214743062 | 2,81326E-12 | 0,21514095   | 8,71345E-11 |
| G3BP2     | 0,216153694 | 1,25883E-10 | 0,035303856  | 3,28547E-09 |
| QSER1     | 0,216479184 | 1,12307E-09 | 0,245757075  | 2,48783E-08 |
| PAK4      | 0,217728535 | 7,60461E-10 | 0,212469043  | 1,56256E-08 |

|          |             |             |              |             |
|----------|-------------|-------------|--------------|-------------|
| XPO7     | 0,22005962  | 6,08035E-10 | 0,362979256  | 1,38675E-08 |
| GLS      | 0,221393157 | 5,26482E-06 | 0,098285319  | 4,06962E-05 |
| PPP2R5E  | 0,222337762 | 2,34897E-05 | 0,119466596  | 0,000142597 |
| ZNF704   | 0,224643334 | 9,67632E-11 | -0,130857909 | 2,30166E-09 |
| GD11     | 0,224908403 | 1,4691E-08  | 0,287303099  | 2,24034E-07 |
| NBEA     | 0,225044441 | 1,41415E-11 | 0,095338384  | 3,72465E-10 |
| ETS1     | 0,227657783 | 4,69793E-09 | -0,104608212 | 7,56721E-08 |
| CAPRN2   | 0,232903585 | 2,80743E-09 | 0,323633291  | 4,76985E-08 |
| DYNC2H1  | 0,233029159 | 2,23923E-08 | -0,041875051 | 2,94714E-07 |
| DNAJC13  | 0,233463817 | 1,42625E-09 | 0,001919591  | 2,75776E-08 |
| MAPK1    | 0,234545713 | 8,1348E-10  | 0,086312715  | 1,8482E-08  |
| MECP2    | 0,235776012 | 4,7371E-08  | 0,157064778  | 6,84672E-07 |
| SBNO1    | 0,241194294 | 2,62959E-05 | 0,385339742  | 0,000153461 |
| ILF3     | 0,243668337 | 0,084865813 | -0,633881995 | 0,131816392 |
| PHTF2    | 0,244314696 | 4,8354E-12  | 0,096558324  | 1,423E-10   |
| AGO4     | 0,246086779 | 1,00533E-11 | 0,220267843  | 2,78993E-10 |
| ZC3H6    | 0,24922022  | 7,31204E-11 | -0,116795884 | 2,01963E-09 |
| SRPK2    | 0,250340335 | 6,84131E-09 | -0,009222326 | 1,12294E-07 |
| CTNNA1   | 0,252130447 | 5,25801E-07 | 0,20785326   | 5,39505E-06 |
| RAB31P   | 0,253273524 | 9,88018E-08 | 0,299458912  | 1,0057E-06  |
| FAM102A  | 0,254298144 | 2,66583E-09 | 0,092027998  | 5,31768E-08 |
| ZBTB4    | 0,25951442  | 4,93266E-10 | 0,103799838  | 1,14135E-08 |
| TMEM87A  | 0,263818165 | 7,23803E-07 | 0,139873312  | 7,51391E-06 |
| DNAJC5   | 0,272588915 | 9,20526E-08 | 0,105911487  | 1,10365E-06 |
| PCNP     | 0,274548603 | 1,30873E-08 | 0,205624012  | 2,28009E-07 |
| PTBP2    | 0,27610622  | 4,11187E-13 | 0,171050496  | 1,3532E-11  |
| ZNF37A   | 0,276204841 | 1,26288E-08 | 0,144956318  | 2,00834E-07 |
| TGFBRAP1 | 0,277624519 | 4,76961E-13 | 0,313058364  | 1,56477E-11 |
| RASSF8   | 0,280425632 | 1,49344E-11 | 0,029258248  | 4,20593E-10 |
| ANTXR1   | 0,283832689 | 8,06488E-06 | 0,070617089  | 4,60228E-05 |
| KLHL42   | 0,290077447 | 1,20164E-09 | 0,113516976  | 2,19754E-08 |
| PPP1R9A  | 0,290148589 | 5,45506E-08 | 0,126099292  | 6,4713E-07  |
| SLC25A36 | 0,290316178 | 1,6461E-08  | 0,181998802  | 2,59379E-07 |
| CDC73    | 0,301833682 | 3,6523E-08  | 0,107194093  | 5,53495E-07 |
| SECISBP2 | 0,306592746 | 2,33598E-08 | -0,080467032 | 3,39992E-07 |
| BRWD1    | 0,307076281 | 1,26321E-06 | 0,245260303  | 1,12884E-05 |
| YWHAZ    | 0,317028858 | 0,005015992 | 0,094255461  | 0,01160902  |
| ZMYND11  | 0,320440466 | 2,14763E-07 | 0,049096154  | 2,39142E-06 |
| TMF1     | 0,323201579 | 1,88197E-05 | 0,166772582  | 0,00011574  |
| DNAJC21  | 0,330678419 | 2,2634E-07  | 0,151248486  | 2,67589E-06 |
| MMP14    | 0,3329941   | 0,035698133 | 0,676298348  | 0,059087257 |
| YLPM1    | 0,341003773 | 0,00010273  | 0,337583178  | 0,000460822 |
| MAP1B    | 0,341020946 | 0,005569409 | -0,18456093  | 0,012794016 |
| ZNF326   | 0,352771396 | 1,41184E-08 | 0,153406239  | 2,37942E-07 |
| SMC6     | 0,35698859  | 1,88148E-06 | 0,264135995  | 1,58768E-05 |
| MFSD6    | 0,358880473 | 1,05687E-12 | 0,277181196  | 3,37246E-11 |
| CAMSAP2  | 0,361907987 | 1,04861E-07 | 0,267345768  | 1,24558E-06 |
| INO80    | 0,367227837 | 3,48893E-08 | 0,068677259  | 5,13446E-07 |
| ZNF655   | 0,370937787 | 1,17809E-07 | 0,385517145  | 1,47948E-06 |
| GPBP1    | 0,441802315 | 0,008001667 | 0,427969031  | 0,017348765 |
| PAFAH1B2 | 0,44276804  | 0,000274609 | 0,028324496  | 0,001085269 |
| TBL1XR1  | 0,470181436 | 2,62592E-06 | 0,339986377  | 2,04642E-05 |
| TNPO1    | 0,51332461  | 0,000384335 | 0,438357068  | 0,001441994 |
