# Supplementary material for: A MiR181/Sirtuin1 regulatory circuit modulates drug response in biliary cancers
Source: Springer Nature journal article supplement (doi:10.1007/s10238-024-01332-0), 2024-04-10
Supplement: MOESM6 [file 26963182]

Table S4. GSEA querying Molecular Signature database (MSigDB) of DE target genes in BTC patients expressing high mRNA-181c and -181d versus low, using hallmark, wikipathways, reactome and KEGG pathways

| GENE SET                             | pval  | FDR   | ES     | NES     | Pathways     |
|--------------------------------------|-------|-------|--------|---------|--------------|
| ANDROGEN_RESPONSE                    | 0.000 | 0.000 | -0.618 | -23.210 |              |
| BILE_ACID_METABOLISM                 | 0.000 | 0.002 | -0.838 | -21.683 |              |
| MYC_TARGETS_V1                       | 0.039 | 0.122 | -0.396 | -15.556 |              |
| MYC_TARGETS_V2                       | 0.060 | 0.135 | -0.764 | -15.078 |              |
| HEDGEHOG_SIGNALING                   | 0.062 | 0.149 | -0.723 | -14.451 |              |
| ADIPOGENESIS                         | 0.099 | 0.135 | -0.376 | -14.394 |              |
| OXIDATIVE_PHOSPHORYLATION            | 0.085 | 0.229 | -0.452 | -13.198 |              |
| FATTY_ACID_METABOLISM                | 0.223 | 0.351 | -0.438 | -12.178 |              |
| ESTROGEN_RESPONSE_EARLY              | 0.231 | 0.362 | -0.220 | -11.888 | Hallmark     |
| ESTROGEN_RESPONSE_LATE               | 0.743 | 0.837 | -0.192 | -0.810  |              |
| PEROXISOME                           | 0.308 | 0.458 | -0.443 | -11.096 |              |
| HYPOXIA                              | 0.381 | 0.644 | -0.177 | -0.989  |              |
| NOTCH_SIGNALING                      | 0.470 | 0.621 | -0.581 | -0.977  |              |
| MTORC1_SIGNALING                     | 0.455 | 0.590 | -0.174 | -0.971  |              |
| PI3K_AKT_MTOR_SIGNALING              | 0.828 | 0.820 | -0.181 | -0.789  |              |
| PROTEIN_SECRETION                    | 0.988 | 0.961 | -0.221 | -0.632  |              |
| <hr/>                                |       |       |        |         |              |
| P53_TRANSCRIPTIONAL_GENE_NETWORK     | 0.014 | 0.485 | 0.680  | 16.207  |              |
| APOPTOSIS                            | 0.463 | 0.925 | 0.484  | 0.999   |              |
| ANGIOGENESIS                         | 0.048 | 0.238 | -0.695 | -15.721 |              |
| EGFR_TYROSINE_KINASE_INHIBITOR_RESIS | 0.054 | 0.333 | -0.387 | -14.700 |              |
| TARGET_OF_RAPAMYCIN_SIGNALING        | 0.135 | 0.434 | -0.609 | -13.240 |              |
| PI3KAKTMTOR_SIGNALING_PATHWAY_AND    | 0.220 | 0.561 | -0.482 | -12.018 |              |
| MODULATION_OF_PI3KAKTMTOR_SIGNALIN   | 0.102 | 0.433 | -0.961 | -12.848 |              |
| WNT_SIGNALING                        | 0.237 | 0.636 | -0.304 | -11.304 |              |
| DNA_DAMAGE_RESPONSE_ONLY_ATM_DEP     | 0.167 | 0.563 | -0.283 | -11.993 |              |
| DNA_MISMATCH_REPAIR                  | 0.801 | 0.950 | -0.601 | -0.802  |              |
| MAPK_CASCADE                         | 0.337 | 0.656 | -0.482 | -10.905 |              |
| NRF2_PATHWAY                         | 0.018 | 0.336 | 0.811  | 15.579  |              |
| NUCLEAR_RECEPTORS                    | 0.001 | 0.018 | -0.676 | -20.550 |              |
| ESTROGEN_RECEPTOR_PATHWAY            | 0.001 | 0.050 | -0.968 | -18.889 |              |
| FATTY_ACID_BIOSYNTHESIS              | 0.001 | 0.019 | -0.939 | -21.452 |              |
| OMEGA9_FATTY_ACID_SYNTHESIS          | 0.001 | 0.059 | -0.972 | -18.915 |              |
| FATTY_ACID_TRANSPORTERS              | 0.003 | 0.064 | -0.913 | -18.271 |              |
| OXYSTEROLS_DERIVED_FROM_CHOLESTER    | 0.025 | 0.411 | -0.984 | -13.213 |              |
| FATTY_ACID_BETAOXIDATION             | 0.210 | 0.562 | -0.523 | -11.975 |              |
| MEVALONATE_ARM_OF_CHOLESTEROL_BI     | 0.288 | 0.634 | -0.837 | -11.291 | WikiPathways |
| CHOLESTEROL_SYNTHESIS_DISORDERS      | 0.330 | 0.641 | -0.837 | -11.101 |              |
| CHOLESTEROL_BIOSYNTHESIS_PATHWAY     | 0.351 | 0.635 | -0.837 | -11.027 |              |
| CHOLESTEROL_METABOLISM               | 0.859 | 0.962 | -0.455 | -0.749  |              |
| LIPID_METABOLISM_PATHWAY             | 0.820 | 0.975 | -0.385 | -0.758  |              |
| CHOLESTEROL_METABOLISM               | 0.005 | 0.062 | -0.731 | -18.412 |              |
| SREBF_LIPID_HOMEOSTASIS              | 0.028 | 0.266 | -0.803 | -15.518 |              |
| STEROL_REGULATORY_ELEMENTBINDING_I   | 0.196 | 0.558 | -0.311 | -12.046 |              |
| TRANSCRIPTIONAL_CASCADE_REGULATING   | 0.027 | 0.295 | -0.933 | -15.313 |              |
| ENERGY_METABOLISM                    | 0.845 | 0.958 | -0.261 | -0.786  |              |
| MITOCHONDRIAL_COMPLEX_IV_ASSEMBLY    | 0.282 | 0.618 | -0.879 | -11.560 |              |
| MITOCHONDRIAL_FATTY_ACID_BETAOXID/   | 0.006 | 0.242 | -0.967 | -15.781 |              |
| MITOCHONDRIAL_COMPLEX_I_ASSEMBLY_    | 0.032 | 0.332 | -0.898 | -14.635 |              |
| ELECTRON_TRANSPORT_CHAIN_OXP/OS_     | 0.042 | 0.353 | -0.880 | -14.466 |              |
| GLYOXYLATE_METABOLISM                | 0.003 | 0.171 | -0.979 | -16.445 |              |
| GLYCOLYSIS_AND_GLUconeogenesis       | 0.127 | 0.418 | -0.693 | -13.473 |              |
| PPAR_SIGNALING_PATHWAY               | 0.005 | 0.018 | -0.752 | -2.094  |              |
| PPARALPHA_PATHWAY                    | 0.064 | 0.432 | -0.966 | -12.888 |              |
| NAD_METABOLISM_SIRTUINS_AND_AGING    | 0.406 | 0.731 | -0.779 | -10.451 |              |
| NAD_METABOLISM_                      | 0.965 | 1.000 | -0.328 | -0.639  |              |
| FOXA2_PATHWAY                        | 0.621 | 0.866 | -0.538 | -0.885  |              |
| <hr/>                                |       |       |        |         |              |
| FATTY_ACYL_COA_BIOSYNTHESIS          | 0.001 | 0.059 | -0.939 | -20.775 |              |
| ABC_TRANSPORTER_DISORDERS            | 0.005 | 0.133 | -0.737 | -1.877  |              |
| NUCLEAR_RECEPTOR_TRANSCRIPTION_PA    | 0.009 | 0.120 | -0.513 | -18.674 |              |
| ABC_FAMILY_PROTEINS_MEDIATED_TRAN    | 0.013 | 0.133 | -0.737 | -17.999 |              |
| SYNTHESIS_OF_VERY_LONG_CHAIN_FATTY   | 0.007 | 0.121 | -0.913 | -17.999 |              |
| HEDGEHOG_LIGAND_BIOGENESIS           | 0.004 | 0.179 | -0.854 | -17.229 |              |
| FATTY_ACID_METABOLISM                | 0.006 | 0.177 | -0.598 | -17.123 |              |
| RAF_INDEPENDENT_MAPK1_3_ACTIVATION   | 0.025 | 0.173 | -0.680 | -16.959 |              |
| SIGNALING_BY_NOTCH3                  | 0.016 | 0.245 | -0.867 | -16.342 |              |
| ATF6_ATF6_ALPHA_ACTIVATES_CHAPERON   | 0.018 | 0.252 | -0.841 | -16.255 |              |
| ACTIVATED_NTRK2_SIGNALS_THROUGH_PI   | 0.020 | 0.262 | -0.940 | -15.854 |              |
| RHO_GTPASES_ACTIVATE_PKNS            | 0.051 | 0.289 | -0.428 | -15.524 |              |
| ACTIVATION_OF_GENE_EXPRESSION_BY_SI  | 0.036 | 0.276 | -0.490 | -1.551  |              |
| PKA_ACTIVATION_IN_GLUcAGON_SIGNALL   | 0.066 | 0.314 | -0.767 | -15.248 |              |
| RHO_GTPASES_ACTIVATE_PAKS            | 0.043 | 0.318 | -0.692 | -15.190 | Reactome     |
| MTOR_SIGNALING                       | 0.057 | 0.318 | -0.610 | -15.093 |              |
| RESPIRATORY_ELECTRON_TRANSPORT_AT    | 0.047 | 0.315 | -0.898 | -15.040 |              |
| NICOTINAMIDE_SALVAGING               | 0.036 | 0.320 | -0.888 | -14.914 |              |
| RESPIRATORY_ELECTRON_TRANSPORT       | 0.042 | 0.328 | -0.898 | -14.848 |              |
| THE_CITRIC_ACID_TCA_CYCLE_AND_RESPI  | 0.024 | 0.320 | -0.898 | -14.825 |              |
| COMPLEX_I_BIOGENESIS                 | 0.050 | 0.334 | -0.898 | -14.703 |              |
| PCP_CE_PATHWAY                       | 0.041 | 0.328 | -0.882 | -14.702 |              |
| ENERGY_DEPENDENT_REGULATION_OF_MT    | 0.045 | 0.350 | -0.862 | -14.122 |              |
| NOTCH3_INTRACELLULAR_DOMAIN_REGUL    | 0.075 | 0.371 | -0.866 | -13.999 |              |
| MITOCHONDRIAL_PROTEIN_IMPORT         | 0.068 | 0.387 | -0.625 | -13.879 |              |
| RHO_GTPASES_ACTIVATE_CIT             | 0.125 | 0.394 | -0.691 | -1.372  |              |
| RHO_GTPASES_ACTIVATE_ROCKS           | 0.102 | 0.390 | -0.691 | -13.712 |              |
| MITOCHONDRIAL_TRANSLATION            | 0.097 | 0.397 | -0.828 | -13.663 |              |
| SENESCENCE_ASSOCIATED_SECRETORY_PI   | 0.147 | 0.393 | -0.500 | -13.658 |              |
| <hr/>                                |       |       |        |         |              |
| PEROXISOME                           | 0.003 | 0.000 | -0.871 | -2.379  |              |
| PPAR_SIGNALING_PATHWAY               | 0.003 | 0.010 | -0.752 | -2.082  |              |
| FATTY_ACID_METABOLISM                | 0.003 | 0.048 | -0.913 | -1.838  |              |
| PROTEASOME                           | 0.043 | 0.344 | -0.882 | -1.479  |              |
| INSULIN_SIGNALING_PATHWAY            | 0.043 | 0.427 | -0.298 | -1.420  |              |
| GLYOXYLATE_AND_DICARBOXYLATE_MET     | 0.003 | 0.379 | -1.000 | -1.343  |              |
| GLYCINE_SERINE_AND_THREONINE_METAE   | 0.018 | 0.469 | -0.992 | -1.305  |              |
| PHENYLALANINE_METABOLISM             | 0.048 | 0.475 | -0.979 | -1.297  |              |
| TYROSINE_METABOLISM                  | 0.054 | 0.495 | -0.979 | -1.286  |              |
| HEDGEHOG_SIGNALING_PATHWAY           | 0.184 | 0.519 | -0.908 | -1.210  | KEGG         |
| TAURINE_AND_HYPOTAURINE_METABOLIS!   | 0.230 | 0.548 | -0.872 | -1.169  |              |
| LYSINE_DEGRADATION                   | 0.289 | 0.549 | -0.592 | -1.156  |              |
| GALACTOSE_METABOLISM                 | 0.272 | 0.540 | -0.692 | -1.153  |              |
| FRUCTOSE_AND_MANNANOSE_METABOLISM    | 0.307 | 0.583 | -0.513 | -1.117  |              |
| CIRCADIAN_RHYTHM_MAMMAL              | 0.333 | 0.603 | -0.484 | -1.102  |              |
| GLYCOSYLPHOSPHATIDYLINOSITOL_GPI_AI  | 0.331 | 0.630 | -0.635 | -1.083  |              |
| GLYCOLYSIS_GLUconeogenesis           | 0.581 | 0.736 | -0.692 | -0.934  |              |
| BIOSYNTHESIS_OF_UNSATURATED_FATTY    | 0.687 | 0.881 | -0.498 | -0.821  |              |
