# Supplementary material for: A MiR181/Sirtuin1 regulatory circuit modulates drug response in biliary cancers
Source: Springer Nature journal article supplement (doi:10.1007/s10238-024-01332-0), 2024-04-10
Supplement: MOESM7 [file 26963182]

Table S5. Functional annotation of target genes negatively regulated by miRNA 181c/d in BTC

| Functional Category                                | Genes in list | interaction                                           | interaction score |
|----------------------------------------------------|---------------|-------------------------------------------------------|-------------------|
| HALLMARK ADIPOGENESIS                              | CD302         | SIRT1 (pp) DICER1; CD302 (pp) DICER1                  | 0.727             |
|                                                    | PRDX3         | SIRT1 (pp) PPARGC1A; PPARGC1A (pp) PRDX3              | 0.460             |
| HALLMARK ANDROGEN RESPONSE                         | SORD          | SIRT1 (pp) CAT; CAT (pp) SORD                         | 0.858             |
| HALLMARK HYPOXIA                                   | ERO1A         | SIRT1 (pp) ARNTL; ERO1L (pp) ARNTL                    | 0.459             |
|                                                    | ETS1          | SIRT1 (pp) TP53; TP53 (pp) ETS1                       | 0.999             |
|                                                    | KLF7          | SIRT1 (pp) PPARG; PPARG (pp) KLF7                     | 0.438             |
|                                                    | PAM           |                                                       |                   |
|                                                    | TGFBI         | SIRT1 (pp) MMP2; MMP2 (pp) TGFBI                      | 0.615             |
|                                                    | PAM           | SIRT1 (pp) TP53; PAM (pp) FAU; RPS27A (pp) FAU        | 0.999             |
| HALLMARK MTORC1 SIGNALING                          | ERO1A         | SIRT1 (pp) ARNTL; ERO1L (pp) ARNTL                    | 0.459             |
|                                                    | SORD          | SIRT1 (pp) CAT; CAT (pp) SORD                         | 0.858             |
| HALLMARK MYC TARGETS                               | PRDX3         | SIRT1 (pp) PPARGC1A; PPARGC1A (pp) PRDX3              | 0.460             |
|                                                    | SORD          | SIRT1 (pp) CAT; CAT (pp) SORD                         | 0.858             |
|                                                    | SSB           | SIRT1 (pp) MDM2; MDM2 (pp) SSB                        | 0.680             |
| HALLMARK OXIDATIVE PHOSPHORYLATION                 | PRDX3         | SIRT1 (pp) PPARGC1A; PPARGC1A (pp) PRDX3              | 0.460             |
| KEGG PPAR SIGNALING_PATHWAY                        | PDPK1         | SIRT1 (pp) FOXO3; PDPK1 (pp) FOXO3                    | 0.792             |
| REACTOME ABC TRANSPORTER_DISORDERS                 | ERO1A         | SIRT1 (pp) ARNTL; ERO1L (pp) ARNTL                    | 0.459             |
| REACTOME METABOLISM OF AMINO ACIDS AND DERIVATIVES | GLS           | SIRT1 (pp) TP53; TP53 (pp) GLS                        | 0.999             |
|                                                    | RIMKLB        | SIRT1 (pp) MDM2; FOLH1 (pp) MDM2; FOLH1 (pp) RIMKLB   | 0.787             |
|                                                    | SECISBP2      | SIRT1 (pp) MDM2; MDM2 (pp) RPL30; SECISBP2 (pp) RPL30 | 0.787             |
| REACTOME NUCLEAR RECEPTOR TRANSCRIPTION PATHWAY    | ESR1          | SIRT1 (pp) ESR1                                       | 0.909             |
|                                                    | NR2C2         | SIRT1 (pp) HDAC3; HDAC3 (pp) NR2C2                    | 0.524             |
